# Supplementary material for: Health workers’ perspectives of a mobile health tool to improve diagnosis and management of paediatric acute respiratory illnesses in Uganda: a qualitative study
Source: PubMed Central journal article supplement — BMJ Open. 2021 Jul 19;11(7):e049708. doi: 10.1136/bmjopen-2021-049708 (PMC8291301; doi:10.1136/bmjopen-2021-049708), 2021-07-19
Supplement: bmjopen-2021-049708.draft_revisions.pdf [file bmjopen-2021-049708.draft_revisions.pdf]

# BMJ Open

BMJ Open is committed to open peer review. As part of this commitment we make the peer review history of every article we publish publicly available.

When an article is published we post the peer reviewers' comments and the authors' responses online. We also post the versions of the paper that were used during peer review. These are the versions that the peer review comments apply to.

The versions of the paper that follow are the versions that were submitted during the peer review process. They are not the versions of record or the final published versions. They should not be cited or distributed as the published version of this manuscript.

BMJ Open is an open access journal and the full, final, typeset and author-corrected version of record of the manuscript is available on our site with no access controls, subscription charges or pay-per-view fees (<http://bmjopen.bmj.com>).

If you have any questions on BMJ Open's open peer review process please email [info.bmjopen@bmj.com](mailto:info.bmjopen@bmj.com)

# BMJ Open

## Health workers' perspectives of a mobile health tool to improve diagnosis and management of pediatric acute respiratory illnesses in Uganda: A qualitative study

|                               |                                                                                                                                                                                                                                                                                                                                                                                                                                                                                                                                                                                                                                                                                                                                                                                                                                                                                                                                                                                                                                                                           |
|-------------------------------|---------------------------------------------------------------------------------------------------------------------------------------------------------------------------------------------------------------------------------------------------------------------------------------------------------------------------------------------------------------------------------------------------------------------------------------------------------------------------------------------------------------------------------------------------------------------------------------------------------------------------------------------------------------------------------------------------------------------------------------------------------------------------------------------------------------------------------------------------------------------------------------------------------------------------------------------------------------------------------------------------------------------------------------------------------------------------|
| Journal:                      | <i>BMJ Open</i>                                                                                                                                                                                                                                                                                                                                                                                                                                                                                                                                                                                                                                                                                                                                                                                                                                                                                                                                                                                                                                                           |
| Manuscript ID                 | bmjopen-2021-049708                                                                                                                                                                                                                                                                                                                                                                                                                                                                                                                                                                                                                                                                                                                                                                                                                                                                                                                                                                                                                                                       |
| Article Type:                 | Original research                                                                                                                                                                                                                                                                                                                                                                                                                                                                                                                                                                                                                                                                                                                                                                                                                                                                                                                                                                                                                                                         |
| Date Submitted by the Author: | 02-Feb-2021                                                                                                                                                                                                                                                                                                                                                                                                                                                                                                                                                                                                                                                                                                                                                                                                                                                                                                                                                                                                                                                               |
| Complete List of Authors:     | Ellington, Laura; University of Washington School of Medicine, Pediatrics<br>Najjingo, Irene; Makerere University College of Health Sciences, Makerere University Lung Institute<br>Rosenfeld, Margaret; University of Washington School of Medicine, Pediatrics; University of Washington School of Public Health<br>Stout, James ; University of Washington School of Medicine, Pediatrics; University of Washington School of Public Health<br>Farquhar, Stephanie ; University of Washington School of Public Health<br>Vashistha, Aditya; Cornell University, Computer Science<br>Nekesa, Bridget; Makerere University College of Health Sciences, Makerere University Lung Institute<br>Namiya, Zaituni; Makerere University College of Health Sciences, Makerere University Lung Institute<br>Kruse, Agatha ; University of Washington, Computer Science and Engineering<br>Anderson, Richard; University of Washington, Computer Science and Engineering<br>Nantanda, Rebecca; Makerere University College of Health Sciences, Makerere University Lung Institute |
| Keywords:                     | Respiratory infections < THORACIC MEDICINE, International health services < HEALTH SERVICES ADMINISTRATION & MANAGEMENT, Community child health < PAEDIATRICS, Paediatric thoracic medicine < PAEDIATRICS, PUBLIC HEALTH, QUALITATIVE RESEARCH                                                                                                                                                                                                                                                                                                                                                                                                                                                                                                                                                                                                                                                                                                                                                                                                                            |
|                               |                                                                                                                                                                                                                                                                                                                                                                                                                                                                                                                                                                                                                                                                                                                                                                                                                                                                                                                                                                                                                                                                           |

SCHOLARONE™  
Manuscripts

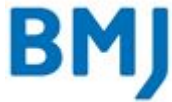

I, the Submitting Author has the right to grant and does grant on behalf of all authors of the Work (as defined in the below author licence), an exclusive licence and/or a non-exclusive licence for contributions from authors who are: i) UK Crown employees; ii) where BMJ has agreed a CC-BY licence shall apply, and/or iii) in accordance with the terms applicable for US Federal Government officers or employees acting as part of their official duties; on a worldwide, perpetual, irrevocable, royalty-free basis to BMJ Publishing Group Ltd ("BMJ") its licensees and where the relevant Journal is co-owned by BMJ to the co-owners of the Journal, to publish the Work in this journal and any other BMJ products and to exploit all rights, as set out in our [licence](#).

The Submitting Author accepts and understands that any supply made under these terms is made by BMJ to the Submitting Author unless you are acting as an employee on behalf of your employer or a postgraduate student of an affiliated institution which is paying any applicable article publishing charge ("APC") for Open Access articles. Where the Submitting Author wishes to make the Work available on an Open Access basis (and intends to pay the relevant APC), the terms of reuse of such Open Access shall be governed by a Creative Commons licence – details of these licences and which [Creative Commons](#) licence will apply to this Work are set out in our licence referred to above.

Other than as permitted in any relevant BMJ Author's Self Archiving Policies, I confirm this Work has not been accepted for publication elsewhere, is not being considered for publication elsewhere and does not duplicate material already published. I confirm all authors consent to publication of this Work and authorise the granting of this licence.

1  
2  
3  
4  
5  
6  
7  
8  
9  
10  
11 **Health workers' perspectives of a mobile health tool to improve diagnosis and**  
12 **management of pediatric acute respiratory illnesses in Uganda: A qualitative study**  
13  
14  
15  
16  
17  
18  
19

20 Laura E Ellington, MD MS<sup>1\*</sup>; Irene Najjingo<sup>2</sup>; Margaret Rosenfeld, MD MPH<sup>1,3</sup>; James W Stout,  
21 MD MPH<sup>1,3</sup>; Stephanie A Farquhar, PhD<sup>3</sup>; Aditya Vashistha, PhD MS<sup>4</sup>; Bridget Nekesa<sup>2</sup>; Zaituni  
22 Namiya<sup>2</sup>; Agatha J Kruse<sup>5</sup>; Richard Anderson, PhD<sup>5</sup>; Rebecca Nantanda, MBChB, PhD<sup>2</sup>  
23  
24

25  
26 <sup>1</sup> Department of Pediatrics, University of Washington School of Medicine, Seattle, Washington,  
27  
28 USA  
29

30 <sup>2</sup> Makerere University Lung Institute, Makerere University College of Health Sciences, Kampala,  
31  
32 Uganda  
33

34 <sup>3</sup> University of Washington School of Public Health, Seattle, Washington, USA  
35

36 <sup>4</sup> Cornell University School of Computer Science, Ithaca, NY, USA  
37

38 <sup>5</sup> University of Washington School of Computer Science and Engineering, Seattle, Washington,  
39  
40 USA  
41  
42  
43  
44

45 \*Corresponding author: Laura E. Ellington, 4800 Sand Point Way NE, Seattle, WA 98105;

46  
47 [lelling@uw.edu](mailto:lelling@uw.edu)  
48  
49  
50  
51  
52  
53

54 **Word count: 5000**  
55  
56  
57  
58  
59  
60

## Abstract

**Objectives:** Mobile health tools have potential to improve the diagnosis and management of acute lower respiratory illnesses (ALRI), a leading cause of pediatric mortality worldwide. The objectives were to evaluate health workers' perceptions of acceptability, usability, and feasibility of ALRITE, a novel mobile health tool to help frontline health workers diagnose, treat and provide education about ALRI in children <5 years.

**Design:** A qualitative study including informal semi-structured interviews with health facility administrators and focus groups and qualitative usability evaluations with primary care health workers.

**Setting:** Two federally funded Ugandan primary care health facilities, one peri-urban and one rural.

**Participants:** We enrolled 3 health administrators and 28 health workers (clinical officers and nurses).

**Intervention:** The ALRITE smartphone application was developed to help frontline health workers adhere to ALRI guidelines and differentiate wheezing illnesses from pneumonia in children under 5 years of age. ALRITE contains a simple decision tree, a partially automated respiratory rate counter, educational videos, and an adapted respiratory assessment score to determine bronchodilator responsiveness.

**Results:** Themes impacting the potential implementation of ALRITE were organized using individual-level, clinic-level, and health-system level determinants. Individual-level determinants were acceptability and perceived benefit, usability, provider needs, and provider-patient relationship. Clinic-level determinants were limited resources and integration within the health center. Systems-level determinants included medication shortages and stakeholder engagement.

1  
2  
3 Conclusions: Incorporation of these themes will ready ALRITE for field testing. Early  
4  
5 engagement of end-users provides insights critical to the development of tailored mHealth  
6  
7 decision support tools.  
8  
9  
10  
11  
12  
13  
14  
15  
16  
17  
18  
19  
20  
21  
22  
23  
24  
25  
26  
27  
28  
29  
30  
31  
32  
33  
34  
35  
36  
37  
38  
39  
40  
41  
42  
43  
44  
45  
46  
47  
48  
49  
50  
51  
52  
53  
54  
55  
56  
57  
58  
59  
60

For peer review only

### Strengths and limitations of this study

- Health workers reported high acceptability and usability of our novel mobile health tool, while also providing critical feedback for improved usability and adaptation to their clinical setting.
- Health worker and health administrators provided a rich understanding of the health setting and potential systems-based and individual level challenges to implementation.
- This study was limited by perspectives at two health centers, which may not reflect regional differences in resource availability, staffing, and health workers' perceptions.
- Health worker perceptions were obtained without experience using ALRITE in clinical practice, which will be a focus of future work.
- Our results support the continued development of tailored mHealth tools for decision support in LMICs based on high user acceptability and usability.

**Keywords:** Community child Health, international health services, paediatric thoracic medicine, respiratory infections, qualitative research, public health

## INTRODUCTION

Acute lower respiratory illnesses (ALRI) remain a leading cause of mortality in children under 5, responsible for 15% of all deaths in this age range.<sup>1,2</sup> Over 800,000 young children worldwide die of ALRI each year; 500,000 of these deaths occur in sub-Saharan Africa.<sup>1-5</sup> In Uganda, ALRI is responsible for 11% deaths in children under 5.<sup>5,6</sup> ALRI encompass multiple disease processes that include bacterial pneumonia, viral pneumonia, and wheezing illnesses. Differentiating between these diseases and choosing the appropriate treatment plan is challenging, especially where skilled personnel and diagnostic tools are lacking. The World Health Organization (WHO) Integrated Management of Childhood Illnesses (IMCI) provides guidelines for ALRI diagnosis and management, with emphasis on pneumonia and treatment with antibiotics. The IMCI was updated in 2014 to include assessment of wheezing and treatment with inhaled bronchodilators,<sup>7</sup> but wheezing illness remains underdiagnosed and undertreated in low- and middle-income countries (LMICs).<sup>8,9</sup>

Mobile phone use recently surpassed two-thirds of the global population and over 70% in Uganda<sup>10</sup>, offering opportunities for digital health tools to enhance adherence to guidelines and build capacity through clinician education.<sup>11-16</sup> Importantly, small pilot studies of mHealth tools based on WHO IMCI ALRI guidelines demonstrated promising preliminary results but have not addressed wheezing illness.<sup>17-20</sup> To promote responsible, sustainable, and high impact mHealth interventions in LMICs, the WHO recently released digital health guidelines recommending high quality research in fields of decision support and education.<sup>21</sup>

We developed the Acute Lower Respiratory Illness Treatment and Evaluation (ALRITE) mHealth application as a decision support tool to aid frontline health workers to improve diagnosis and treatment of ALRI in children under 5 years of age, with a particular focus on distinguishing wheezing illness from pneumonia. In order to address potential challenges with



1  
2  
3 widespread ALRITE use, this study sought to understand determinants of successful ALRITE  
4 implementation from the end users' perspective. The objective of this study was to evaluate  
5 health workers' perceptions of feasibility, usability, and acceptability of the ALRITE mHealth tool  
6 in two Ugandan primary care health centers. This user-centered, formative approach will inform  
7 further development of a locally relevant decision support tool to improve the diagnosis and  
8 treatment of ALRI in Ugandan health centers.  
9  
10  
11  
12  
13  
14  
15  
16  
17

## 18 **METHODS**

### 19 **Study design**

20 This study uses a human-centered, or participatory, approach to examine frontline health  
21 workers' perceptions of ALRITE and its impact on their workflows and patient care. We  
22 developed an initial prototype of ALRITE and used it as a technology probe to gather insights  
23 about its feasibility, usability, and acceptability.<sup>22</sup> We used a qualitative approach consisting of  
24 informal semi-structured interviews with health facility administrators and focus groups with  
25 primary care health workers (clinical officers and nurses). We also performed qualitative  
26 usability evaluations, in which we guided users through 2-3 clinical scenarios with limited  
27 prompting to obtain information on user agility (moving through the app screens), user  
28 feedback, and errors made during the scenarios.  
29  
30  
31  
32  
33  
34  
35  
36  
37  
38  
39  
40  
41  
42

### 43 **Study sites**

44 Both study sites were federally funded Health Center IV in Jinja district, Uganda and offer free  
45 healthcare. The peri-urban site is located 15 minutes driving from the city center of Jinja, the  
46 second largest city in Uganda, and the rural site is located 45-60 minutes driving from Jinja.  
47 Both sites have inpatient and outpatient facilities and an operating theater for obstetrics and  
48 urgent surgical cases.  
49  
50  
51  
52  
53  
54  
55  
56  
57  
58  
59  
60

1  
2  
3 The health care delivery system in Uganda has 6 levels that build on the previous level: 1)  
4 Health Center II provides basic outpatient care; 2) Health Center III has maternity services; 3)  
5 Health Center IV has primary care, basic inpatient facilities and emergency obstetric care; 4)  
6 District Hospitals have general surgery, dental services, and diagnostic services (i.e. chest  
7 radiography and laboratory); 5) Regional Referral Hospitals have specialized care; 6) National  
8 Referral Hospital has additional specialized and sub-specialized services.  
9  
10  
11  
12  
13  
14  
15  
16  
17

18 The two specific Health Center IV were selected for this study based on prior research  
19 indicating that 1) adherence to IMCI was low, 2) consultations were performed by health  
20 workers with limited training, 3) antibiotics were over-prescribed, and 4) inhaled bronchodilators  
21 for wheezing illness were not prescribed.<sup>9</sup>  
22  
23  
24  
25  
26  
27

## 28 **Participants**

29 We recruited at least 1 health administrator for semi-structured interviews from each study site.  
30 Health administrators were clinicians (medical doctors or clinical officers) who serve a director  
31 role in leadership and staff supervision at an individual health center, termed locally as “health  
32 facility in-charges”. Eligible participants for focus groups were health workers (clinical officers or  
33 nurses) who had been working at the study site for at least 6 months and were responsible for  
34 outpatient care of children. Clinical officers complete a three-year diploma course in clinical  
35 medicine. Nurses in these health centers primarily act as clinicians due to staff shortages and  
36 task shifting. The study team employed in-person information sessions for recruitment using  
37 convenience sampling. All participants provided a written informed consent in English for their  
38 participation.  
39  
40  
41  
42  
43  
44  
45  
46  
47  
48  
49  
50  
51  
52  
53

## 54 **ALRITE mHealth tool**

1  
2  
3 Based on a previous mHealth tool, mPneumonia<sup>17 18</sup>, the ALRITE mHealth application was  
4 developed for smartphones to help frontline health workers adhere to IMCI guidelines and  
5 differentiate wheezing illnesses from pneumonia in children under 5 years of age. ALRITE  
6 contains a simple decision tree, a partially automated respiratory rate counter, educational  
7 videos, and an adapted respiratory assessment score to determine bronchodilator  
8 responsiveness (Figure 1). The algorithm walks the user through basic demographics, IMCI  
9 danger signs, medical history, physical exam, and bronchodilator assessment (if appropriate).  
10 The final diagnoses include severe disease, pneumonia, wheezing illness, and upper respiratory  
11 illness. The app is 27 MB and was downloaded on supplied Android smartphones for study use.  
12  
13  
14  
15  
16  
17  
18  
19  
20  
21  
22  
23

#### 24 **Data collection**

25  
26 Focus groups and interviews were performed primarily in English using interview/focus group  
27 guides and clinical scenarios for usability evaluations (Supplementary information). Ugandan  
28 research assistants did provide clarifications and some probing in the local language; some  
29 participant responses were given in the local language and translated to English for the study  
30 notes. All interviews and focus groups were digitally recorded, deidentified, and transcribed into  
31 English by IN, who is fluent in English and the local language. Transcriptions were reviewed by  
32 IN and LEE for content and cultural accuracy. Members of the study team (LEE, IN, MR, SAF)  
33 took notes during usability evaluations, focus groups, and interviews to augment and clarify the  
34 transcribed notes.  
35  
36  
37  
38  
39  
40  
41  
42  
43  
44  
45  
46

#### 47 **Study team**

48  
49 This was an international collaboration, including experts in public health, pulmonology/asthma,  
50 information and communication technology for development, human-computer interaction, and  
51 community-based interventions. Research assistants BN and ZN from Uganda experienced in  
52 qualitative interviewing and fluent in the local language led focus groups and interviews with the  
53  
54  
55  
56  
57  
58  
59  
60

1  
2  
3 guidance of LEE, a content expert in the ALRITE app with previous qualitative experience in  
4 technology implementation. SAF provided qualitative expertise in design, data collection, and  
5 analysis. RN provided local expertise in health systems, qualitative design and interview guides,  
6 and pediatrics. IN provided local research coordination and knowledge of the health system.  
7  
8 Pediatric expertise was provided by RN and JS with additional pediatric pulmonology expertise  
9 by MR and LEE. ALRITE app design and development was performed by AK, AV, and RA, with  
10 additional expertise in usability evaluations and human-centered design by AV.  
11  
12  
13  
14  
15  
16  
17  
18  
19

## 20 **Analysis**

21  
22 We analyzed our detailed notes and transcripts using an inductive thematic approach, whereby  
23 the researchers LEE, SAF, and IN examined the data to identify common themes for each of the  
24 research questions. During the analysis, the team documented outlier or dissenting  
25 perspectives in order to provide a more complete picture of participant responses to ALRITE.  
26  
27 First, LEE and SAF read through each of the transcripts and set of notes and then we  
28 developed a provisional framework based on primary research questions. LEE, SAF, MR, IN,  
29 BN, and ZN held team meetings following each day of data collection to compile notes, review  
30 emerging themes, and refine the coding framework. Codes were aggregated into major themes  
31 and subthemes without the use of coding software. Additional meetings with the research team  
32 allowed for further refinement of themes and subthemes. Transcripts were reread to ensure that  
33 preliminary results represented the majority of user feedback. The quotes were chosen to  
34 confirm and highlight themes and introduce diverging viewpoints not previously captured. The  
35 Standards for Reporting Qualitative Research (SRQR) were used to guide reporting.<sup>23</sup>  
36  
37  
38  
39  
40  
41  
42  
43  
44  
45  
46  
47  
48  
49  
50

## 51 **Ethics**

The study was approved by the Mulago Hospital Research and Ethics Committee and Uganda National Council for Science and Technology (HS2692). The study was reviewed and received exempt status from the University of Washington (STUDY0007895).

### Patient and Public involvement

While not involved in the design, conduct, or reporting, study participants are involved in ultimate design and implementation of the intervention and are included in the dissemination plan, along with district- and national-level health system members and patient caregivers.

## RESULTS

### Participant & setting characteristics

In January 2020, we enrolled 28 healthcare provider participants across 2 health centers in Uganda. Key stakeholders, including 3 health administrators (HA), took part in individual in-depth interviews, while 5 clinical officers and 20 nurses (HW) took part in 3 focus groups (Table 1).

**Table 1. Focus group participant characteristics**

|                                         | Rural Site<br>(n=12) | Peri-urban<br>Site<br>(n=13) |
|-----------------------------------------|----------------------|------------------------------|
| <b>Role</b>                             |                      |                              |
| Clinical officer                        | 2                    | 3                            |
| Nurse                                   | 10                   | 10                           |
| <b>Female</b>                           | 9                    | 10                           |
| <b>Age</b>                              |                      |                              |
| <30 years                               | 5                    | 5                            |
| 30-40 years                             | 5                    | 6                            |
| >40 years                               | 2                    | 2                            |
| <b>Experience in health care, years</b> |                      |                              |
| < 5                                     | 2                    | 3                            |
| 5-10                                    | 8                    | 4                            |
| > 10                                    | 2                    | 6                            |

1  
2  
3 We identified several themes impacting the development and implementation of ALRITE in  
4  
5 Ugandan health centers from the perspective of health administrators and frontline health  
6  
7 workers. Themes were organized by a social ecological model of determinants: individual, clinic,  
8  
9 and health system (Figure 2). Individual-level determinants were acceptability and perceived  
10  
11 benefit, usability, provider needs, and provider-patient relationship. Clinic-level determinants  
12  
13 were limited resources, integration within the health center. Systems-level determinants  
14  
15 included medication shortages and stakeholder engagement. Each theme is presented below in  
16  
17 greater detail and with direct quotes that typify respondent comments.  
18  
19  
20  
21

## 22 **Individual-level**

### 23 **Acceptability & perceived benefit of ALRITE**

24  
25 All health workers indicated they would like to have ALRITE available to use in their healthcare  
26  
27 setting. Health workers also reported that they appreciated that ALRITE reminded them of  
28  
29 important medical questions to ask and key components of the physical exam.  
30  
31  
32  
33  
34

35 “It helps us to remember the clear assessment of these children because at times  
36  
37 you are rushing and forget to assess something. You go with what you see quickly,  
38  
39 but the app gives you the procedure to follow. It also helps in giving the right doses.”  
40

41 HW-002-FG2  
42  
43  
44

45 They responded positively to the integrated respiratory rate counter. Health workers’ eagerness  
46  
47 to learn was apparent during focus groups and interviews. Indeed, many health workers  
48  
49 reported the educational videos were one of their favorite features of ALRITE. In addition to data  
50  
51 gathering, health workers liked the information management capabilities, including medication  
52  
53 dosing, which is generally age- or weight-based for children.  
54  
55  
56  
57  
58  
59  
60

1  
2  
3 “The part of the app that I like mainly are the videos. It is good because it helps  
4 diagnosing and guides through the right treatment hence saving patient time.” HA-  
5  
6  
7 001  
8  
9

10  
11 “[The respiratory rate counter] is convenient because you may not have a watch.”  
12  
13  
14 HW-007-FG3.  
15

16  
17  
18 It is important to acknowledge the novelty of ALRITE as a mHealth app technology likely  
19  
20 contributed to high acceptability by health workers as well.  
21  
22

23  
24 “[Providers] usually like new technology, I think they will be excited to use it and  
25  
26 therefore they are likely to download [the app]. In addition, people prefer digital  
27  
28 information than opening and reading what is in the [IMCI] book.” HA-003  
29  
30

31  
32  
33 Respondents had ideas for improving acceptability, appropriateness, and potential benefit of  
34  
35 ALRITE. Health workers asked for additional automated or semi-automated smartphone tools,  
36  
37 such as pulse oximetry or digital auscultation to be integrated into ALRITE. Multiple health  
38  
39 workers commented on the potential for storage of clinical information. One health worker  
40  
41 wanted to use it as a personal quality control device to review his previous diagnoses and  
42  
43 treatment plans. A few wanted the app expanded to other disease processes and age groups.  
44  
45 Some health workers suggested incorporating additional educational components targeted to  
46  
47 patients and families. One health worker suggested incorporating risk stratification for children  
48  
49 with chronic disease and environmental risk factors (i.e. smoke exposure, crowded housing) in  
50  
51 order to focus on prevention.  
52  
53  
54  
55  
56  
57  
58  
59  
60

1  
2  
3 “[In the app], we are missing [a question on] the type of fuel used at home to cook  
4 and source of light. Some produce a lot of smoke. [By offering recommendations,  
5 families] can change the way of cooking, hence reducing exposures. This could help  
6 in prevention [of respiratory diseases]. We therefore can make a recommendation  
7 and follow up in about 6 months.” HW-005-FG3  
8  
9  
10  
11  
12  
13  
14  
15

### 16 ALRITE usability

17 We defined usability as “the design factors that affect the user experience of operating the  
18 application’s device and navigating the application for its intended purpose.”<sup>18</sup> ALRITE features  
19 that contributed to a positive user experience included overall design, simplicity, flow, and clarity  
20 of diagnosis. Generally, health workers thought the app was easy to follow and would be quick  
21 to get to diagnosis.  
22  
23  
24  
25  
26  
27  
28  
29

30 “It saves time. You diagnose very fast and you are able to know the treatment to give  
31 so it improves on the appropriate management of patients.” HW-001-FG1  
32  
33  
34  
35  
36

37 Health workers who owned smartphones were more facile with ALRITE during usability  
38 evaluations than those who owned simple mobile phones, moving through the scenarios faster  
39 with fewer errors. Importantly, after the first standardized clinical scenario, all health workers  
40 spent less time and were more facile using ALRITE on subsequent scenarios without much  
41 guidance from the research team. Proficiency with the app was not formally tested.  
42  
43  
44  
45  
46  
47  
48

49 Health workers provided valuable feedback to improve the usability of ALRITE, including minor  
50 changes to the visual display, layout, and flow of the app. For example, health workers  
51 recommended larger font for better visualization. They also recommended using a patient age  
52 group instead of date of birth for 2 reasons: 1) health workers had difficulty using the calendar  
53  
54  
55  
56  
57  
58  
59  
60



1  
2  
3 function, and 2) caregivers may not know a child's date of birth, so asking for a child's age  
4 group is standard practice.  
5  
6  
7

#### 8 9 Provider-specific needs

10  
11 Another important consideration to ALRITE acceptability is the end user's experience with  
12 smartphones. In our study, all health workers owned a mobile phone, of which approximately  
13 60% owned a smartphone. Most who owned a smartphone used social media or communication  
14 apps. No health workers we spoke with were using mHealth apps, and only a few had heard of  
15 these types of apps.  
16  
17  
18  
19  
20  
21  
22  
23

24 All those with smartphones preferred that ALRITE be directly downloaded to their personal  
25 devices compared to clinic-supplied devices, as they would be more likely to use the app if it  
26 were readily available on their own smartphones. Additionally, if health workers used the app on  
27 their own smartphones rather than a clinic-supplied device, they said they would be less likely to  
28 lose or misplace the device. However, one health worker reminded the group that not everyone  
29 has a smartphone, so smartphones would need to be made available to individuals without a  
30 personal device. Health workers were pleased that the size of the app was only (27Mb).  
31  
32  
33  
34  
35  
36  
37  
38  
39  
40

41 The provider's training level was also an important factor. In different levels of health centers in  
42 Uganda, there are health workers with varying levels of training and provider roles, ranging from  
43 nurse to medical officer. End users with limited clinical training may be more likely to use  
44 ALRITE in practice to help with clinical decision-making than others with more training or clinical  
45 experience who may not think additional clinical decision support adds value to their clinical  
46 care.  
47  
48  
49  
50  
51  
52  
53  
54  
55  
56  
57  
58  
59  
60

1  
2  
3 “There are incidences when the doctors are not at the clinic and the nurse needs to  
4 make a diagnosis and give treatment as well. ALRITE will save time.” HA-001  
5  
6  
7  
8

#### 9 Provider-patient relationship

10 Health workers had some concerns regarding ALRITE use in their clinic. Some thought that  
11 using the app in front of patients and families would reduce the quality and quantity of personal  
12 interaction at a clinic visit. Some also expressed concern that if they used ALRITE to help make  
13 clinical decisions, families would lose trust in health workers’ ability to diagnose and treat.  
14 However, one respondent also suggested that the app could be used as an educational tool for  
15 families and help build trust during the visit.  
16  
17  
18  
19  
20  
21  
22  
23  
24  
25

26 “The first challenge is on the side of our clients. When you are busy using the app,  
27 the client might think you’re neglecting her or him and you’re busy on WhatsApp, and  
28 secondly, a client might think you’re not knowledgeable enough since you’re using a  
29 phone and lose trust in you thinking you don’t know what to do... But I think I can  
30 start by engaging the patients and informing them that what I am going to do is for  
31 your good, I am not just looking for answers but rather improving diagnosis for your  
32 child.” HW-003-FG2  
33  
34  
35  
36  
37  
38  
39  
40  
41  
42

#### 43 **Clinic-level**

44 Limited resources

##### 45 *High patient volume and limited staffing*

46  
47 At the peri-urban site, 100-300 patients are seen in the ambulatory clinic daily, 60% of which are  
48 children (IC-001). Similarly, at the rural site, a stakeholder reported, “we see about 100-200  
49 patients daily... and about 45% of these are children less than 5 years.” (IC-003). Stakeholders  
50 identified the most common pediatric conditions: malaria, ALRI, and diarrhea. A combination of  
51  
52  
53  
54  
55  
56  
57  
58  
59  
60

1  
2  
3 clinical officers and nurses without specialty pediatric training see pediatric patients at both  
4 sites. The peri-urban site also staffs a few general medical doctors, but they are not always on  
5 site. All health workers reported they received IMCI training, from which Uganda Clinical  
6 Guidelines are derived.<sup>24</sup> Health workers reported that visit length typically ranges from 10-15  
7 minutes, but a few reported they often take less than 10 minutes.  
8  
9  
10  
11  
12  
13  
14  
15

16 “In assessing children, we have a challenge with patient load with few trained health  
17 workers who can assess patients. It’s a facility in a semi-urban area so the numbers are  
18 big with few health workers, and treatment is not always available.” HA-001  
19  
20  
21  
22  
23

#### 24 *Limited resources for the diagnosis of pediatric respiratory disease*

25 To diagnose respiratory disease, both sites reported use of stethoscopes, although these are  
26 not universally available, nor are they required to use IMCI. They rely on personal watches to  
27 count respiratory rate, but not everyone has a watch. Pulse oximetry is not typically available.  
28  
29  
30  
31  
32  
33

34 “We have one pulse oximeter in [the operating] theater, but we are currently not using it  
35 because it gives confusing results.” HA-003  
36  
37  
38  
39  
40

41 “It is not a problem [to use a stethoscope], but if it is not available, we resort to the IMCI  
42 approach where you depend on a physical exam [without a stethoscope]. In addition,  
43 what compromises quality is the number of patients waiting in the line to be reviewed,  
44 and you may end up missing out on an important indicator.” HW-002-FG3  
45  
46  
47  
48  
49  
50

#### 51 *Limited resources and training affecting adherence to WHO IMCI*

52 All health workers received WHO IMCI training. However, they reported that adherence to IMCI  
53 can be challenging for a number of reasons. Firstly, IMCI incorporates respiratory rate and  
54  
55  
56  
57  
58  
59  
60

1  
2  
3 evaluation of respiratory distress into its clinical decision algorithm. Some health workers  
4 reported that counting respiratory rate is impossible without a watch or timer. Secondly, IMCI  
5 recommends evaluation of wheezing, but this exam finding is challenging to diagnose,  
6 especially without a stethoscope.  
7  
8  
9  
10

11  
12  
13  
14 “[Chest] indrawing is easier [to assess] compared to wheezing.” HW-001-FG3  
15

16  
17  
18 “Monitoring during the care of these children or reassessing the vitals is a challenge.”  
19  
20 HW-003-FG3  
21

22  
23  
24 Health workers frequently denied opportunities for robust continuing medical education or  
25 refresher trainings for IMCI.  
26  
27

28  
29  
30 “We have sent people for IMCI training. We also have a national trainer at the facility  
31 who organizes [continuous medical education], but the turnout of health workers is  
32 usually not good. Usually, when people do something for many years, they tend to  
33 think there is nothing new they can learn.” HA-003  
34  
35  
36  
37  
38  
39  
40

41 Thirdly, availability and use of the IMCI materials are limited in health centers. IMCI can be  
42 available in paper or electronic form. However, health workers reported that the paper form is  
43 not convenient to use due to the size of the booklet and the likelihood of misplacing it. One  
44 health administrator reported that his health center had IMCI installed on a laptop, but the laptop  
45 broke and was not replaced.  
46  
47  
48  
49  
50

51  
52  
53 ALRITE integration into existing health system

54  
55  
56 *Change to workflow*  
57  
58

1  
2  
3 Integrating ALRITE into clinical practice will inevitably change clinic workflow. It may contribute  
4 to duplicative work because the current system includes entering data into a written health  
5 record. Interestingly, this was not brought up as a concern during focus groups or interviews.  
6  
7 Furthermore, using a new technology will be slow at first and may make patient encounters  
8 longer rather than shorter in an already busy clinic. Health workers reported that they would  
9 need to practice with ALRITE prior to using it with patients to improve work efficiency.  
10  
11  
12  
13  
14  
15  
16  
17

18 “At first, it’s likely to slow the work because we may be learning the app but with time  
19 it will become part of us, and we become part of it so it will ease the work... we need  
20 to be familiar with it to help us save time so that patients do not see us take a lot of  
21 time on the phones.” HW-002-FG2  
22  
23  
24  
25  
26  
27

28 “I think we shall have to sort out those with respiratory illnesses at triage which is  
29 different from what is being done currently where all patients follow the same  
30 assessment route regardless of condition.” HW-001-FG1  
31  
32  
33  
34  
35  
36

37 Furthermore, current practice in Ugandan health centers does not routinely include  
38 reassessment of patients after a bronchodilator trial, which is necessary to ascertain whether  
39 patients would benefit from treatment with a bronchodilator. Most health workers thought it  
40 would be feasible to reassess patients if warranted; however, a few health workers reported that  
41 many patients leave after the initial assessment. Lack of reassessment would limit providers’  
42 ability to determine bronchodilator responsiveness, an important factor in diagnosing wheezing  
43 illnesses and asthma in young children and therefore an important component of ALRITE.  
44  
45  
46  
47  
48  
49  
50  
51  
52

53 “We reassess only those who are admitted on the wards. We reassess if the child  
54 worsens, but if they are improving, we reassess them the next day during the ward  
55  
56  
57  
58  
59  
60

1  
2  
3 rounds. I think it's important to integrate the app into the system because it gives  
4 reminders about reassessing a patient." HA-001  
5  
6  
7

8  
9 "There is no opportunity [to reassess children] because most of them come from far  
10 and do not usually come back [after treatment is prescribed]." HW-001-FG3  
11  
12  
13

### 14 15 *Triage*

16 One current challenge and potential opportunity for ALRITE integration is in patient triage.  
17  
18 Health administrators reported no formal triage process to risk-stratify patients as they present  
19 to care. There is also no separate pediatric clinic. All patients are seen in the order they arrive,  
20 whether adults or children. One health administrator saw ALRITE implementation as an  
21 opportunity to establish triage at their health center. He suggested that ALRITE could be used  
22 earlier when pediatric patients arrive to the clinic to prioritize those with WHO danger signs and  
23 acute respiratory distress.  
24  
25  
26  
27  
28  
29  
30  
31  
32  
33  
34

35 "[Challenges include] lack of a dedicated clinician to manage children and lack of  
36 enough consultation rooms. There is also a knowledge gap in assessing children. We do  
37 not have a triage area where we are able to prioritize those with worse conditions. We  
38 usually just do visual observation of who is an emergency situation instead of taking  
39 medical history and a few vitals. The other issue is we don't differentiate children from  
40 adults, they all go through the same entry point... The other [issue] is lack of an  
41 emergency unit for children with severe difficulty in breathing." HA-003  
42  
43  
44  
45  
46  
47  
48  
49  
50

### 51 **Systems-level**

52 Medication shortages impacting ALRITE management  
53  
54  
55  
56  
57  
58  
59  
60

1  
2  
3 Aside from features of ALRITE itself, we explored other factors that would impact feasibility of  
4 ALRITE at a systems level. ALRITE recommends treatment for children with respiratory  
5 illnesses, including antibiotics for pneumonia and inhaled bronchodilators with/without systemic  
6 corticosteroids for wheezing. Oral salbutamol is generally available at the health centers and  
7 sometimes used for children but carries a high side effect profile and is not recommended for  
8 acute wheezing in children.<sup>25 26</sup> Health administrator at both sites reported very limited  
9 availability of inhaled bronchodilators (2-3 inhalers every 2 months). Health workers may  
10 prescribe medications if not available on site, but this requires family members to pay out-of-  
11 pocket for prescribed medications at an off-site pharmacy or higher-level health center. Even if  
12 ALRITE improves diagnosis of wheezing illness, its impact and feasibility will be greatly limited if  
13 appropriate treatment is not readily available.  
14  
15  
16  
17  
18  
19  
20  
21  
22  
23  
24  
25  
26  
27

28 “We are not independent when it comes to drugs. Supplies are from National Medical  
29 Stores, and they usually give what they have unless you have an independent  
30 source outside of the usual supply chain.” HA-002  
31  
32  
33  
34  
35  
36

37 “The app talks about the bronchodilator, but it doesn’t talk about other drugs to give.  
38 Here at the low-level facilities we do not have the bronchodilators.” HW-002-FG1  
39  
40  
41  
42

### 43 Stakeholder buy-in

44 While not a common theme, one health administrator emphasized the importance of engaging  
45 stakeholders early for successful implementation. Specifically, the administrator explained that  
46 the Ministry of Health in Uganda and local district health officials would need to approve the app  
47 prior to large scale distribution across public and private facilities. Additionally, support at these  
48 leadership levels will be critical for widespread uptake and implementation of ALRITE.  
49  
50  
51  
52  
53  
54  
55  
56  
57  
58  
59  
60

## DISCUSSION

In this study, we identified key determinants of successful implementation of ALRITE, our mHealth decision support tool, from frontline health workers' perspectives (Figure 2). In addition to ALRITE-specific determinants, health workers and administrators identified important individual-level, clinic-level, and health systems-level determinants and offered innovative ideas for future app development. Overall, these results support ongoing development of ALRITE for potential integration into routine clinical care and underscore the importance of user-centered design early in development prior to implementation of a new technology. ALRITE, if successfully implemented, has the potential to improve childhood morbidity and mortality in three major ways: 1) increased awareness, diagnosis and treatment of wheezing illness, 2) improved IMCI guideline adherence, and 3) effective triage of critically ill infants and children. Potential challenges identified include changes to the provider-patient relationship, time constraints, and medication shortages. However, through thoughtful design and implementation, ALRITE has potential to overcome these challenges by enhancing the provider-patient relationship through education and improved management, improving clinical efficiency through a streamlined process, and increasing supply of life-saving medications such as inhaled bronchodilators through increased awareness, advocacy, and demand.

Previous studies have also evaluated mHealth decision support based on WHO IMCI.<sup>17-19</sup> The predecessor to ALRITE, mPneumonia, demonstrated high acceptability and usability in pilot studies in Ghana.<sup>17 18</sup> Unlike ALRITE, mPneumonia was designed to use on clinic-supplied tablets. Health workers were not as familiar with smartphones and had difficulty navigating the application and general tablet use.<sup>17</sup> Furthermore, health workers expressed potential challenges of mPneumonia including access to electricity and added time to patient encounters.<sup>18</sup> The disparate results between mPneumonia and ALRITE likely reflects interval



1  
2  
3 improvements in devices and software as well as additional experience with smartphones given  
4 growing mobile phone use worldwide.  
5  
6  
7

8  
9 Two important systematic reviews of health workers' perspectives using mHealth in primary  
10 care highlighted similar themes.<sup>21 27</sup> Decision support mHealth tools achieved high acceptability,  
11 with health workers reporting increased efficiency, better access to information, and improved  
12 adherence to guidelines.<sup>21</sup> Similar to our results, some health workers were concerned mHealth  
13 may negatively impact the provider-patient relationship,<sup>21</sup> but this concern has not been  
14 evaluated by patients or caregivers. Contrary to our results, some health workers were  
15 concerned the algorithm was too prescriptive for clinical decision making.<sup>21</sup> We found that health  
16 workers appreciated the simple ALRITE algorithm, which may reflect the limited clinical training  
17 in our study population. Additional factors influencing health workers' acceptability of mHealth  
18 technologies were cost to the health worker, previous mobile phone experience, and increased  
19 time/workload.<sup>27</sup> While our study did not evaluate cost, as ALRITE would be a free application,  
20 health workers did appreciate that ALRITE had a small footprint (27 Mb) so would not require  
21 much data or take up much smartphone memory. Conversely, health worker perceptions of  
22 ALRITE did not change based on prior mobile phone experience, but those with smartphone  
23 experience were much more facile with the app.  
24  
25  
26  
27  
28  
29  
30  
31  
32  
33  
34  
35  
36  
37  
38  
39  
40  
41  
42

43 There has been a recent explosion of digital health tools for use in LMICs, but evidence on  
44 effectiveness and scale-up has been lacking.<sup>11 16 28 29</sup> An early human-centered approach to  
45 evaluation is critical to better understand determinants for successful implementation and to  
46 guide further mHealth design. Therefore, we engaged health administrators and frontline health  
47 workers early in the development of ALRITE to better inform acceptability, appropriateness, and  
48 feasibility of its use in Ugandan health centers. Through stakeholder interviews, health worker  
49 focus groups, and usability evaluations, we not only received important feedback to improve  
50  
51  
52  
53  
54  
55  
56  
57  
58  
59  
60

1  
2  
3 ALRITE, but also gained a richer understanding of the health setting and potential systems-  
4 based and individual level challenges to implementation.  
5  
6  
7  
8

9 This study had important limitations. First, perceptions of health workers were limited to two  
10 health facilities in Uganda. We purposefully chose one peri-urban and one rural health center to  
11 better understand differences in resource availability, staffing, and health workers' perceptions.  
12 However, there may be additional regional differences in perceptions of and comfort with  
13 ALRITE that have yet to be explored. Secondly, it may be possible that we did not capture the  
14 full breadth of perspectives, as health workers with dissenting opinions may not have felt  
15 comfortable speaking up during focus groups. We tried to address this by probing for dissenting  
16 opinions during focus groups and with individual usability evaluations. Thirdly, we did not  
17 perform a formal quantitative usability evaluation but rather described general trends and  
18 observations. A formal evaluation of end user proficiency was not the objective of this study  
19 because the ALRITE app was still in the prototype phase. Finally, health worker perceptions  
20 were obtained without experience using ALRITE in clinical practice. This understanding of  
21 feasibility in clinical care will be a major focus of future work.  
22  
23  
24  
25  
26  
27  
28  
29  
30  
31  
32  
33  
34  
35  
36  
37  
38

39 Next steps include updating ALRITE based on user feedback and field testing with frontline  
40 health workers. We will also address important potential barriers for implementation, including  
41 engaging caregivers, streamlining the ALRITE app to limit any negative effect on existing  
42 workflow, developing training programs, ensuring readily available technical support, and  
43 engaging key stakeholders at the Uganda Ministry of Health and district health leadership to  
44 support further research, medication supply, and ultimate implementation of ALRITE.  
45  
46  
47  
48  
49  
50  
51  
52

## 53 **CONCLUSION**

54  
55  
56  
57  
58  
59  
60

1  
2  
3 Taken together, these results provide a detailed, on-the-ground assessment of the opportunities  
4 and challenges in the respiratory assessment, diagnosis and treatment of ALRI in young  
5 children. Further, the engagement of health workers and richness of data collected support the  
6 use of human-centered approaches early-on to identify factors that are pivotal to success of a  
7 mHealth application. Finally, our results support the continued development of tailored mHealth  
8 tools for decision support in LMICs based on high user acceptability and usability.  
9  
10  
11  
12  
13  
14  
15  
16  
17  
18  
19  
20  
21  
22  
23  
24  
25  
26  
27  
28  
29  
30  
31  
32  
33  
34  
35  
36  
37  
38  
39  
40  
41  
42  
43  
44  
45  
46  
47  
48  
49  
50  
51  
52  
53  
54  
55  
56  
57  
58  
59  
60

### **Data availability**

Data supporting the findings are available within the manuscript. Additional quotes are available upon reasonable request to the corresponding author.

### **Acknowledgements**

We would like to sincerely thank all health workers and health facility in-charges who participated in this study. We are also grateful to the Jinja District Health Office who gave permission and support to conduct the study.

### **Author contributions**

LEE, MR, JWS, AV, RA, and RN contributed to the concept and study design. AJK developed the mobile health application with mentorship from AV and RA. LEE, IN, and RN coordinated and supervised data collection from the sites. LEE, MR, SAF, IN, BN, and ZN performed data collection. LEE, SAF, and IN analyzed the data, and all authors contributed to interpretation. LEE wrote the draft of the manuscript. RN provided oversight of the project. All authors worked collaboratively to review, edit, and approve the final manuscript.

### **Competing interests**

The authors report no competing interests.

### **Funding**

This work was supported by the University of Washington Global Innovation Fund, the Firland Foundation, and the Arthur Rosenfeld Endowment for Pediatric Pulmonary Fellows.

## References

1. Liu L, Oza S, Hogan D, et al. Global, regional, and national causes of child mortality in 2000–13, with projections to inform post-2015 priorities: an updated systematic analysis. *The Lancet* 2015;385(9966):430-40. doi: 10.1016/s0140-6736(14)61698-6
2. GBD 2015 Child Mortality Collaborators. Global, regional, national, and selected subnational levels of stillbirths, neonatal, infant, and under-5 mortality, 1980-2015: a systematic analysis for the Global Burden of Disease Study 2015. *Lancet (London, England)* 2016;388(10053):1725-74. doi: 10.1016/s0140-6736(16)31575-6 [published Online First: 2016/10/14]
3. Walker CLF, Rudan I, Liu L, et al. Global burden of childhood pneumonia and diarrhoea. *The Lancet* 2013;381(9875):1405-16. doi: 10.1016/s0140-6736(13)60222-6
4. Zar HJ, Ferkol TW. The global burden of respiratory disease-impact on child health. *Pediatr Pulmonol* 2014;49(5):430-4. doi: 10.1002/ppul.23030 [published Online First: 2014/03/13]
5. McAllister DA, Liu L, Shi T, et al. Global, regional, and national estimates of pneumonia morbidity and mortality in children younger than 5 years between 2000 and 2015: a systematic analysis. *The Lancet Global Health* 2019;7(1):e47-e57. doi: 10.1016/s2214-109x(18)30408-x
6. IHME. Uganda Country Profile 2016 [updated 2016. Available from: <http://www.healthdata.org/uganda> accessed October 19 2018.
7. World Health Organization. Integrated Management of Childhood Illness, 2014.
8. Nantanda R, Tumwine JK, Ndeezi G, et al. Asthma and pneumonia among children less than five years with acute respiratory symptoms in Mulago Hospital, Uganda: evidence of under-diagnosis of asthma. *PLoS One* 2013;8(11):e81562. doi: 10.1371/journal.pone.0081562 [published Online First: 2013/12/07]

- 1  
2  
3 9. Kjaergaard J, Anastasaki M, Stubbe Ostergaard M, et al. Diagnosis and treatment of acute  
4  
5 respiratory illness in children under five in primary care in low-, middle-, and high-income  
6  
7 countries: A descriptive FRESH AIR study. *PLoS One* 2019;14(11):e0221389. doi:  
8  
9 10.1371/journal.pone.0221389 [published Online First: 2019/11/07]
- 10  
11 10. The Collaboration on International ICT Policy for East and Southern Africa. National  
12  
13 Information Technology Survey 2017/18 Report: CIPESA, 2018:274.
- 14  
15 11. Agarwal S, Perry HB, Long LA, et al. Evidence on feasibility and effective use of mHealth  
16  
17 strategies by frontline health workers in developing countries: systematic review. *Trop*  
18  
19 *Med Int Health* 2015;20(8):1003-14. doi: 10.1111/tmi.12525
- 20  
21 12. Kallander K, Tibenderana JK, Akpogheneta OJ, et al. Mobile health (mHealth) approaches  
22  
23 and lessons for increased performance and retention of community health workers in  
24  
25 low- and middle-income countries: a review. *J Med Internet Res* 2013;15(1):e17. doi:  
26  
27 10.2196/jmir.2130
- 28  
29 13. Lodhia V, Karanja S, Lees S, et al. Acceptability, Usability, and Views on Deployment of  
30  
31 Peek, a Mobile Phone mHealth Intervention for Eye Care in Kenya: Qualitative Study.  
32  
33 *JMIR mHealth and uHealth* 2016;4(2):e30. doi: 10.2196/mhealth.4746 [published Online  
34  
35 First: 2016/05/11]
- 36  
37 14. Medhanyie AA, Little A, Yebyo H, et al. Health workers' experiences, barriers, preferences  
38  
39 and motivating factors in using mHealth forms in Ethiopia. *Human Resources for Health*  
40  
41 2015;13(2) doi: doi:10.1186/1478-4491-13-2
- 42  
43 15. Velez O, Okyere PB, Kanter AS, et al. A usability study of a mobile health application for  
44  
45 rural Ghanaian midwives. *Journal of midwifery & women's health* 2014;59(2):184-91. doi:  
46  
47 10.1111/jmwh.12071 [published Online First: 2014/01/10]
- 48  
49 16. Aranda-Jan CB, Mohutsiwa-Dibe N, Loukanova S. Systematic review on what works, what  
50  
51 does not work and why of implementation of mobile health (mHealth) projects in Africa.  
52  
53 *BMC public health* 2014;144:188.
- 54  
55  
56  
57  
58  
59  
60

- 1  
2  
3 17. Ginsburg AS, Delarosa J, Brunette W, et al. mPneumonia: Development of an Innovative  
4  
5 mHealth Application for Diagnosing and Treating Childhood Pneumonia and Other  
6  
7 Childhood Illnesses in Low-Resource Settings. *PLoS One* 2015;10(10):e0139625. doi:  
8  
9 10.1371/journal.pone.0139625 [published Online First: 2015/10/17]  
10
- 11 18. Ginsburg AS, Tawiah Agyemang C, Ambler G, et al. mPneumonia, an Innovation for  
12  
13 Diagnosing and Treating Childhood Pneumonia in Low-Resource Settings: A Feasibility,  
14  
15 Usability and Acceptability Study in Ghana. *PLoS One* 2016;11(10):e0165201. doi:  
16  
17 10.1371/journal.pone.0165201  
18
- 19 19. Rambaud-Althaus C, Shao A, Samaka J, et al. Performance of Health Workers Using an  
20  
21 Electronic Algorithm for the Management of Childhood Illness in Tanzania: A Pilot  
22  
23 Implementation Study. *Am J Trop Med Hyg* 2017;96(1):249-57. doi: 10.4269/ajtmh.15-  
24  
25 0395  
26
- 27 20. Keitel K, D'Acremont V. Electronic clinical decision algorithms for the integrated primary care  
28  
29 management of febrile children in low-resource settings: review of existing tools. *Clin*  
30  
31 *Microbiol Infect* 2018;24(8):845-55. doi: 10.1016/j.cmi.2018.04.014 [published Online  
32  
33 First: 2018/04/24]  
34
- 35 21. WHO guideline: recommendations on digital interventions for health system strengthening.  
36  
37 Geneva: World Health Organization 2019.  
38
- 39 22. Hutchinson H, Mackay W, Westerlund B, et al. Technology probes: inspiring design for and  
40  
41 with families. Proceedings of the SIGCHI Conference on Human Factors in Computing  
42  
43 Systems. Ft. Lauderdale, Florida, USA: Association for Computing Machinery, 2003:17–  
44  
45 24.  
46  
47
- 48 23. O'Brien BC, Harris IB, Beckman TJ, et al. Standards for reporting qualitative research: a  
49  
50 synthesis of recommendations. *Acad Med* 2014;89(9):1245-51. doi:  
51  
52 10.1097/ACM.0000000000000388 [published Online First: 2014/07/01]  
53  
54
- 55 24. Uganda Clinical Guidelines. Fourth ed. Kampala, Uganda: Ministry of Health Uganda 2016.  
56  
57  
58

- 1  
2  
3 25. Global Strategy for Asthma Management and Prevention: MCR VISION, Inc. 2006.  
4  
5 26. World Health Organization Model List of Essential Medicines for Children. 7th Edition ed.  
6  
7 Geneva: World Health Organization 2019.  
8  
9 27. Odendaal WA, Anstey Watkins J, Leon N, et al. Health workers' perceptions and  
10  
11 experiences of using mHealth technologies to deliver primary healthcare services: a  
12  
13 qualitative evidence synthesis. *Cochrane Database Syst Rev* 2020;3:CD011942. doi:  
14  
15 10.1002/14651858.CD011942.pub2 [published Online First: 2020/03/28]  
16  
17 28. Tomlinson M, Rotheram-Borus MJ, Swartz L, et al. Scaling up mHealth: where is the  
18  
19 evidence? *PLoS Med* 2013;10(2):e1001382. doi: 10.1371/journal.pmed.1001382  
20  
21 [published Online First: 2013/02/21]  
22  
23 29. Hall CS, Fottrell E, Wilkinson S, et al. Assessing the impact of mHealth interventions in low-  
24  
25 and middle-income countries--what has been shown to work? *Global health action*  
26  
27 2014;7:25606. doi: 10.3402/gha.v7.25606 [published Online First: 2014/11/02]  
28  
29  
30  
31  
32  
33  
34  
35  
36  
37  
38  
39  
40  
41  
42  
43  
44  
45  
46  
47  
48  
49  
50  
51  
52  
53  
54  
55  
56  
57  
58  
59  
60



1  
2  
3 **Figure 1.** ALRITE sample screenshots. A) Menu screen. B) Respiratory rate counter. C)  
4 Example of diagnosis and treatment recommendations. D) Educational toolkit pop-up on  
5 bronchodilator administration. E) Educational toolkit pop-up on stridor.  
6  
7  
8  
9

10  
11 **Figure 2.** Frontline health workers' perspectives of determinants of ALRITE implementation.  
12  
13  
14  
15  
16  
17  
18  
19  
20  
21  
22  
23  
24  
25  
26  
27  
28  
29  
30  
31  
32  
33  
34  
35  
36  
37  
38  
39  
40  
41  
42  
43  
44  
45  
46  
47  
48  
49  
50  
51  
52  
53  
54  
55  
56  
57  
58  
59  
60

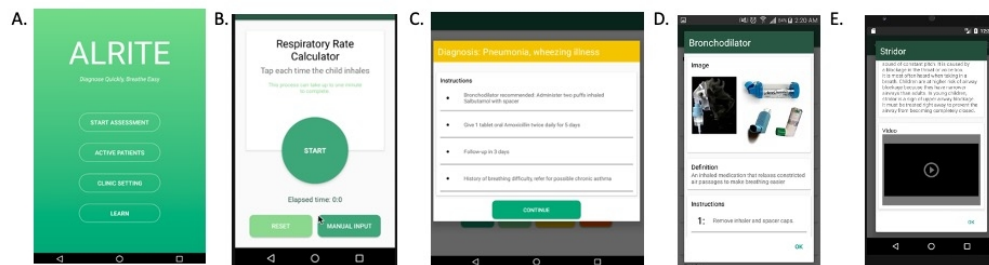

Figure 1. ALRITE sample screenshots. A) Menu screen. B) Respiratory rate counter. C) Example of diagnosis and treatment recommendations. D) Educational toolkit pop-up on bronchodilator administration. E) Educational toolkit pop-up on stridor.

325x87mm (72 x 72 DPI)

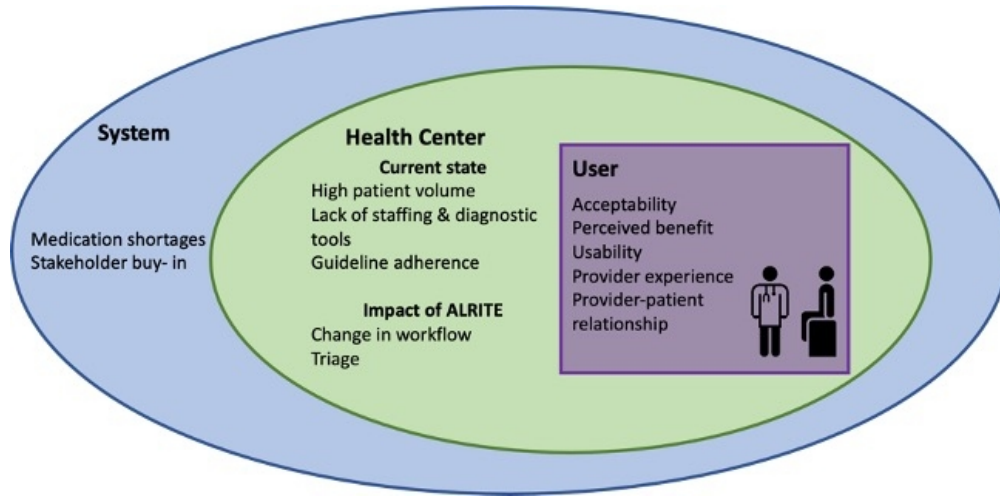

Figure 2. Frontline health workers' perspectives of determinants of ALRITE implementation.

228x112mm (72 x 72 DPI)

## Focus Group: Facilitator's Guide

### I. Brief demonstration of ALRITE (5 min)

This app is 27 Mb. Would you be willing/interested in downloading?

Outline for focus group

1. Information about your health center
2. Feedback on ALRITE app
3. Feasibility of using app within health setting

### II. Basic information

Please raise hand if:

- a. you own a mobile phone
- b. that mobile phone is a smart phone
- c. you regularly use applications on your phone (ex: Facebook, Whatsapp, games...)
- d. you have used a mobile health application
- e. you have completed the WHO IMCI training  
(count and record for each)

Ice breaking questions (choose 1 or 2)

- how often do you see kids compared to adults in your setting?
- What is the typical workflow of children coming into clinic with respiratory complaints? (*how patients move from arrival to discharge and treatment*)
- What are the most common diagnoses that you give to children who come to clinic with respiratory symptoms?
- what kind of equipment and treatments do you have to take care of children with respiratory disease?

### III. General comments – ALRITE tool as mobile app (25 min)

- What are your general thoughts about the app?
- What did you think could be improved?
- Is there anything that you would remove from the app? Or add?
- Would this be something you would prefer to have on your personal phone or keep on a hospital phone/tablet?
- How could this app help fill a need in your clinical setting?
- Where do you see challenges with using the app?

### IV. Feasibility of ALRITE tool (20 min)

1) Bronchodilator timing and reevaluation.

- Tell us about your experience treating children with inhaled bronchodilators.
- The ALRITE app asks to reassess children after receiving a bronchodilator after 10 minutes. If you give bronchodilators to children, do you typically reassess them afterwards? Tell more about it. What are the challenges to perform a reassessment?

2) Integration into clinical practice

- 1 - How do you think using this app would change your workload?
- 2 - Do you think this app will change the flow of patients that you described earlier? Please elaborate.
- 3 - Biggest challenges/barriers to use?

4  
5  
6 **V. IMCI decision tree & Respiratory assessment (if there is time)**

- 7 - How does this protocol/decision tree follow how you currently assess patients in your clinic?
- 8 - Do you think the application impacts your ability to perform respiratory assessment? If so, how? If not,  
9 what would make it more useful?

10  
11  
12  
13 **Closing comments**  
14  
15  
16  
17  
18  
19  
20  
21  
22  
23  
24  
25  
26  
27  
28  
29  
30  
31  
32  
33  
34  
35  
36  
37  
38  
39  
40  
41  
42  
43  
44  
45  
46  
47  
48  
49  
50  
51  
52  
53  
54  
55  
56  
57  
58  
59  
60

For peer review only

# Introduction to ALRITE & Usability test

## Description of ALRITE

ALRITE is a mobile health application that was created to help diagnose and manage acute respiratory illnesses in young children. The goal of the app is to provide decision support to healthcare providers for children with acute respiratory complaints. The app contains a decision tree based on the World Health Organization's (WHO) Integrated Management of Childhood Illness (IMCI) case management guidelines.

One unique addition is that ALRITE will guide you through a respiratory assessment to help decide on whether a bronchodilator trial may be beneficial. Globally, wheezing illnesses are under-recognized and could contribute to severe respiratory illness in young children.

After the assessment, ALRITE will provide most likely diagnoses and treatment recommendations based on the information provided: 1) pneumonia, 2) pneumonia + wheezing illness, 3) severe disease requiring urgent referral/intervention, or 4) upper respiratory infection (supportive care only).

## Instructions to participant:

We will ask you to complete a series of tasks using simulated clinical scenarios. There is no time limit or one single solution to completing each task. The study is designed to test the app and not you. You are welcome to ask me any questions that you have while completing the task. There may be times in the study where I do not answer your question because we are interested in seeing how you solve the problem. I will let you know when I cannot answer your question.

As you complete these tasks, we are going to ask you to think aloud as you work. Thinking aloud will help provide us an idea of what you are thinking as you are completing the task. We understand that you may forget to think aloud. If this happens, we ask you to tell us what you are thinking about. After each task is completed, I will ask you a few questions about the task. After all tasks have been completed, I will ask you a few questions about your overall experience of the ALRITE mobile application. If any of the questions are unclear, please ask for clarification.

We ask that during the scenarios, you imagine that you are using the app in the middle of a busy clinical shift and answer the questions as such.

## Participant Comments & Feedback

Participant comments are verbal cues that indicate successes and failures in the app. We will record these comments digitally for later review as well as notetaking during the interview. Participants will be asked to answer a brief survey after completing the interview.

## Errors

Errors are mistakes that the participants make while using the app that slows or stops the participant from completing each task. This data is critical for fixing errors and increasing efficiency in the app. These errors will be documented by the notetaker.

## Scenario 1:

### **Task 1: Input information provided into the app to determine whether a bronchodilator trial is recommended.**

*A new patient enters your clinic with the following circumstances:*

- *Name: (choose your name)*
- *Female*
- *Birthdate (choose a date where the child is between 4-6 months old)*
- *Alert and playful*
- *Not Vomiting or convulsing*
- *No difficulty eating or drinking*
- *Coughing for 10 days*
- *No HIV exposure risk*
- *This is her third episode of coughing/difficulty breathing episode since birth.*
- *On exam, her temperature is 37.3C. Oxygen saturation 94%. Respiratory rate 64. She has moderate chest indrawing. No Stridor. When you listen with a stethoscope, you hear wheezing when she inhales and exhales.*

**Task 2: Read aloud whether a bronchodilator trial is recommended. If recommended, please find the tutorial on how to administer the bronchodilator and talk through how to administer to your patient. Input that you have administered the bronchodilator in the app.**

## Scenario 2:

### **Task 3: Input information for the respiratory assessment using the video of a child provided.**

*A new patient enters your clinic with the following circumstances:*

- *Name: (choose a friend's name)*
- *Male*
- *Birthdate (choose a date where the child is 3 years old)*
- *Alert and playful*
- *Not Vomiting or convulsing*
- *No difficulty eating or drinking*
- *Coughing for 7 days*
- *No HIV exposure risk*
- *This is his second episode of coughing/difficulty breathing episode since birth*

*Watch video and record respiratory assessment*

**Task 4: Read aloud whether a bronchodilator trial is recommended. Then close the encounter and return to the home screen.**

### Scenario 3:

**Task 5: Return to your first patient's encounter (Scenario 1). Is she ready for re-assessment? How do you know?**

**If ready, please input her follow up examination outlined below.**

- *Name: (your name)*
- *After the bronchodilator, she seems to be breathing a little easier than before the trial. On exam, her oxygen saturation 95%. Respiratory rate 54. She has mild chest indrawing. She still has wheezing but only when she exhales.*

**Task 6: Talk through the diagnosis and treatment recommendations provided by the app.**

For peer review only



# Reporting checklist for qualitative study.

Based on the SRQR guidelines.

|                                            | Reporting Item                                                                                                                                                                                                                                                                                                                                                                                                                                                                                                                                             | Page Number |
|--------------------------------------------|------------------------------------------------------------------------------------------------------------------------------------------------------------------------------------------------------------------------------------------------------------------------------------------------------------------------------------------------------------------------------------------------------------------------------------------------------------------------------------------------------------------------------------------------------------|-------------|
| <b>Title</b>                               |                                                                                                                                                                                                                                                                                                                                                                                                                                                                                                                                                            |             |
|                                            | <a href="#">#1</a> Concise description of the nature and topic of the study identifying the study as qualitative or indicating the approach (e.g. ethnography, grounded theory) or data collection methods (e.g. interview, focus group) is recommended                                                                                                                                                                                                                                                                                                    | 1           |
| <b>Abstract</b>                            |                                                                                                                                                                                                                                                                                                                                                                                                                                                                                                                                                            |             |
|                                            | <a href="#">#2</a> Summary of the key elements of the study using the abstract format of the intended publication; typically includes background, purpose, methods, results and conclusions                                                                                                                                                                                                                                                                                                                                                                | 2           |
| <b>Introduction</b>                        |                                                                                                                                                                                                                                                                                                                                                                                                                                                                                                                                                            |             |
| Problem formulation                        | <a href="#">#3</a> Description and significance of the problem / phenomenon studied: review of relevant theory and empirical work; problem statement                                                                                                                                                                                                                                                                                                                                                                                                       | 4-5         |
| Purpose or research question               | <a href="#">#4</a> Purpose of the study and specific objectives or questions                                                                                                                                                                                                                                                                                                                                                                                                                                                                               | 5           |
| <b>Methods</b>                             |                                                                                                                                                                                                                                                                                                                                                                                                                                                                                                                                                            |             |
| Qualitative approach and research paradigm | <a href="#">#5</a> Qualitative approach (e.g. ethnography, grounded theory, case study, phenomenology, narrative research) and guiding theory if appropriate; identifying the research paradigm (e.g. postpositivist, constructivist / interpretivist) is also recommended; rationale. The rationale should briefly discuss the justification for choosing that theory, approach, method or technique rather than other options available; the assumptions and limitations implicit in those choices and how those choices influence study conclusions and | 8           |

transferability. As appropriate the rationale for several items might be discussed together.

|    |                              |                     |            |
|----|------------------------------|---------------------|------------|
| 1  |                              |                     |            |
| 2  |                              |                     |            |
| 3  |                              |                     |            |
| 4  | Researcher characteristics   | <a href="#">#6</a>  | 7-8        |
| 5  | and reflexivity              |                     |            |
| 6  |                              |                     |            |
| 7  |                              |                     |            |
| 8  |                              |                     |            |
| 9  |                              |                     |            |
| 10 |                              |                     |            |
| 11 |                              |                     |            |
| 12 |                              |                     |            |
| 13 |                              |                     |            |
| 14 | Context                      | <a href="#">#7</a>  | 5-6        |
| 15 |                              |                     |            |
| 16 | Sampling strategy            | <a href="#">#8</a>  | 6,8        |
| 17 |                              |                     |            |
| 18 |                              |                     |            |
| 19 |                              |                     |            |
| 20 |                              |                     |            |
| 21 | Ethical issues pertaining to | <a href="#">#9</a>  | 9          |
| 22 | human subjects               |                     |            |
| 23 |                              |                     |            |
| 24 |                              |                     |            |
| 25 |                              |                     |            |
| 26 |                              |                     |            |
| 27 | Data collection methods      | <a href="#">#10</a> | 7-9        |
| 28 |                              |                     |            |
| 29 |                              |                     |            |
| 30 |                              |                     |            |
| 31 |                              |                     |            |
| 32 |                              |                     |            |
| 33 |                              |                     |            |
| 34 |                              |                     |            |
| 35 | Data collection              | <a href="#">#11</a> | 7,         |
| 36 | instruments and              |                     | supplement |
| 37 | technologies                 |                     |            |
| 38 |                              |                     |            |
| 39 |                              |                     |            |
| 40 |                              |                     |            |
| 41 |                              |                     |            |
| 42 | Units of study               | <a href="#">#12</a> | 9          |
| 43 |                              |                     |            |
| 44 |                              |                     |            |
| 45 |                              |                     |            |
| 46 |                              |                     |            |
| 47 | Data processing              | <a href="#">#13</a> | 7          |
| 48 |                              |                     |            |
| 49 |                              |                     |            |
| 50 |                              |                     |            |
| 51 |                              |                     |            |
| 52 |                              |                     |            |
| 53 |                              |                     |            |
| 54 | Data analysis                | <a href="#">#14</a> | 8          |
| 55 |                              |                     |            |
| 56 |                              |                     |            |
| 57 |                              |                     |            |
| 58 |                              |                     |            |
| 59 |                              |                     |            |
| 60 |                              |                     |            |

|    |                              |                     |                                                                 |       |
|----|------------------------------|---------------------|-----------------------------------------------------------------|-------|
| 1  | Techniques to enhance        | <a href="#">#15</a> | Techniques to enhance trustworthiness and credibility of        | 8     |
| 2  | trustworthiness              |                     | data analysis (e.g. member checking, audit trail,               |       |
| 3  |                              |                     | triangulation); rationale                                       |       |
| 4  |                              |                     |                                                                 |       |
| 5  |                              |                     |                                                                 |       |
| 6  | <b>Results/findings</b>      |                     |                                                                 |       |
| 7  |                              |                     |                                                                 |       |
| 8  |                              |                     |                                                                 |       |
| 9  | Syntheses and                | <a href="#">#16</a> | Main findings (e.g. interpretations, inferences, and themes);   | 9-19  |
| 10 | interpretation               |                     | might include development of a theory or model, or              |       |
| 11 |                              |                     | integration with prior research or theory                       |       |
| 12 |                              |                     |                                                                 |       |
| 13 |                              |                     |                                                                 |       |
| 14 | Links to empirical data      | <a href="#">#17</a> | Evidence (e.g. quotes, field notes, text excerpts,              | 10-19 |
| 15 |                              |                     | photographs) to substantiate analytic findings                  |       |
| 16 |                              |                     |                                                                 |       |
| 17 |                              |                     |                                                                 |       |
| 18 | <b>Discussion</b>            |                     |                                                                 |       |
| 19 |                              |                     |                                                                 |       |
| 20 | Intergration with prior      | <a href="#">#18</a> | Short summary of main findings; explanation of how              | 20-22 |
| 21 | work, implications,          |                     | findings and conclusions connect to, support, elaborate on,     |       |
| 22 | transferability and          |                     | or challenge conclusions of earlier scholarship; discussion     |       |
| 23 | contribution(s) to the field |                     | of scope of application / generalizability; identification of   |       |
| 24 |                              |                     | unique contributions(s) to scholarship in a discipline or field |       |
| 25 |                              |                     |                                                                 |       |
| 26 |                              |                     |                                                                 |       |
| 27 |                              |                     |                                                                 |       |
| 28 | Limitations                  | <a href="#">#19</a> | Trustworthiness and limitations of findings                     | 22    |
| 29 |                              |                     |                                                                 |       |
| 30 |                              |                     |                                                                 |       |
| 31 | <b>Other</b>                 |                     |                                                                 |       |
| 32 |                              |                     |                                                                 |       |
| 33 | Conflicts of interest        | <a href="#">#20</a> | Potential sources of influence of perceived influence on        | 24    |
| 34 |                              |                     | study conduct and conclusions; how these were managed           |       |
| 35 |                              |                     |                                                                 |       |
| 36 |                              |                     |                                                                 |       |
| 37 | Funding                      | <a href="#">#21</a> | Sources of funding and other support; role of funders in data   | 24    |
| 38 |                              |                     | collection, interpretation and reporting                        |       |
| 39 |                              |                     |                                                                 |       |

None The SRQR checklist is distributed with permission of Wolters Kluwer © 2014 by the Association of American Medical Colleges. This checklist can be completed online using <https://www.goodreports.org/>, a tool made by the [EQUATOR Network](#) in collaboration with [Penelope.ai](#)

# BMJ Open

## Health workers' perspectives of a mobile health tool to improve diagnosis and management of pediatric acute respiratory illnesses in Uganda: A qualitative study

|                                 |                                                                                                                                                                                                                                                                                                                                                                                                                                                                                                                                                                                                                                                                                                                                                                                                                                                                                                                                                                                                                                                                                                   |
|---------------------------------|---------------------------------------------------------------------------------------------------------------------------------------------------------------------------------------------------------------------------------------------------------------------------------------------------------------------------------------------------------------------------------------------------------------------------------------------------------------------------------------------------------------------------------------------------------------------------------------------------------------------------------------------------------------------------------------------------------------------------------------------------------------------------------------------------------------------------------------------------------------------------------------------------------------------------------------------------------------------------------------------------------------------------------------------------------------------------------------------------|
| Journal:                        | <i>BMJ Open</i>                                                                                                                                                                                                                                                                                                                                                                                                                                                                                                                                                                                                                                                                                                                                                                                                                                                                                                                                                                                                                                                                                   |
| Manuscript ID                   | bmjopen-2021-049708.R1                                                                                                                                                                                                                                                                                                                                                                                                                                                                                                                                                                                                                                                                                                                                                                                                                                                                                                                                                                                                                                                                            |
| Article Type:                   | Original research                                                                                                                                                                                                                                                                                                                                                                                                                                                                                                                                                                                                                                                                                                                                                                                                                                                                                                                                                                                                                                                                                 |
| Date Submitted by the Author:   | 13-May-2021                                                                                                                                                                                                                                                                                                                                                                                                                                                                                                                                                                                                                                                                                                                                                                                                                                                                                                                                                                                                                                                                                       |
| Complete List of Authors:       | Ellington, Laura; University of Washington School of Medicine, Pediatrics<br>Najjingo, Irene; Makerere University College of Health Sciences,<br>Makerere University Lung Institute<br>Rosenfeld, Margaret; University of Washington School of Medicine,<br>Pediatrics; University of Washington School of Public Health<br>Stout, James ; University of Washington School of Medicine, Pediatrics;<br>University of Washington School of Public Health<br>Farquhar, Stephanie ; University of Washington School of Public Health<br>Vashistha, Aditya; Cornell University, Computer Science<br>Nekesa, Bridget; Makerere University College of Health Sciences,<br>Makerere University Lung Institute<br>Namiya, Zaituni; Makerere University College of Health Sciences,<br>Makerere University Lung Institute<br>Kruse, Agatha ; University of Washington, Computer Science and<br>Engineering<br>Anderson, Richard; University of Washington, Computer Science and<br>Engineering<br>Nantanda, Rebecca; Makerere University College of Health Sciences,<br>Makerere University Lung Institute |
| <b>Primary Subject Heading</b>: | Global health                                                                                                                                                                                                                                                                                                                                                                                                                                                                                                                                                                                                                                                                                                                                                                                                                                                                                                                                                                                                                                                                                     |
| Secondary Subject Heading:      | Paediatrics, Qualitative research, Respiratory medicine, Public health,<br>Infectious diseases                                                                                                                                                                                                                                                                                                                                                                                                                                                                                                                                                                                                                                                                                                                                                                                                                                                                                                                                                                                                    |
| Keywords:                       | Respiratory infections < THORACIC MEDICINE, International health<br>services < HEALTH SERVICES ADMINISTRATION & MANAGEMENT,<br>Community child health < PAEDIATRICS, Paediatric thoracic medicine <<br>PAEDIATRICS, PUBLIC HEALTH, QUALITATIVE RESEARCH                                                                                                                                                                                                                                                                                                                                                                                                                                                                                                                                                                                                                                                                                                                                                                                                                                           |
|                                 |                                                                                                                                                                                                                                                                                                                                                                                                                                                                                                                                                                                                                                                                                                                                                                                                                                                                                                                                                                                                                                                                                                   |

SCHOLARONE™  
Manuscripts



I, the Submitting Author has the right to grant and does grant on behalf of all authors of the Work (as defined in the below author licence), an exclusive licence and/or a non-exclusive licence for contributions from authors who are: i) UK Crown employees; ii) where BMJ has agreed a CC-BY licence shall apply, and/or iii) in accordance with the terms applicable for US Federal Government officers or employees acting as part of their official duties; on a worldwide, perpetual, irrevocable, royalty-free basis to BMJ Publishing Group Ltd ("BMJ") its licensees and where the relevant Journal is co-owned by BMJ to the co-owners of the Journal, to publish the Work in this journal and any other BMJ products and to exploit all rights, as set out in our [licence](#).

The Submitting Author accepts and understands that any supply made under these terms is made by BMJ to the Submitting Author unless you are acting as an employee on behalf of your employer or a postgraduate student of an affiliated institution which is paying any applicable article publishing charge ("APC") for Open Access articles. Where the Submitting Author wishes to make the Work available on an Open Access basis (and intends to pay the relevant APC), the terms of reuse of such Open Access shall be governed by a Creative Commons licence – details of these licences and which [Creative Commons](#) licence will apply to this Work are set out in our licence referred to above.

Other than as permitted in any relevant BMJ Author's Self Archiving Policies, I confirm this Work has not been accepted for publication elsewhere, is not being considered for publication elsewhere and does not duplicate material already published. I confirm all authors consent to publication of this Work and authorise the granting of this licence.

1  
2  
3  
4  
5  
6  
7  
8  
9  
10  
11 **Health workers' perspectives of a mobile health tool to improve diagnosis and**  
12 **management of pediatric acute respiratory illnesses in Uganda: A qualitative study**  
13  
14  
15  
16  
17  
18  
19

20 Laura E Ellington, MD MS<sup>1\*</sup>; Irene Najjingo<sup>2</sup>; Margaret Rosenfeld, MD MPH<sup>1,3</sup>; James W Stout,  
21 MD MPH<sup>1,3</sup>; Stephanie A Farquhar, PhD<sup>3</sup>; Aditya Vashistha, PhD MS<sup>4</sup>; Bridget Nekesa<sup>2</sup>; Zaituni  
22 Namiya<sup>2</sup>; Agatha J Kruse<sup>5</sup>; Richard Anderson, PhD<sup>5</sup>; Rebecca Nantanda, MBChB, PhD<sup>2</sup>  
23  
24  
25

26 <sup>1</sup> Department of Pediatrics, University of Washington School of Medicine, Seattle, Washington,  
27  
28 USA  
29

30 <sup>2</sup> Makerere University Lung Institute, Makerere University College of Health Sciences, Kampala,  
31  
32 Uganda  
33

34 <sup>3</sup> University of Washington School of Public Health, Seattle, Washington, USA  
35

36 <sup>4</sup> Cornell University School of Computer Science, Ithaca, NY, USA  
37

38 <sup>5</sup> University of Washington School of Computer Science and Engineering, Seattle, Washington,  
39  
40 USA  
41  
42  
43  
44

45 \*Corresponding author: Laura E. Ellington, 4800 Sand Point Way NE, Seattle, WA 98105;

46 [lelling@uw.edu](mailto:lelling@uw.edu)  
47  
48  
49  
50  
51  
52  
53

54 **Word count: 5822**  
55  
56  
57  
58  
59  
60

## Abstract

Objectives: Mobile health tools have potential to improve the diagnosis and management of acute lower respiratory illnesses (ALRI), a leading cause of pediatric mortality worldwide. The objectives were to evaluate health workers' perceptions of acceptability, usability, and feasibility of ALRITE, a novel mobile health tool to help frontline health workers diagnose, treat and provide education about ALRI in children <5 years.

Design: A qualitative study including semi-structured interviews with health facility administrators and focus groups with primary care health workers.

Setting: Two federally funded Ugandan primary care health facilities, one peri-urban and one rural.

Participants: We enrolled 3 health administrators and 28 health workers (clinical officers and nurses).

Intervention: The ALRITE smartphone application was developed to help frontline health workers adhere to ALRI guidelines and differentiate wheezing illnesses from pneumonia in children under 5 years of age. ALRITE contains a simple decision tree, a partially automated respiratory rate counter, educational videos, and an adapted respiratory assessment score to determine bronchodilator responsiveness. We performed a demonstration of ALRITE for participants at the beginning of interviews and focus groups. No participant had used ALRITE prior.

Results: Themes impacting the potential implementation of ALRITE were organized using individual-level, clinic-level, and health-system level determinants. Individual-level determinants were acceptability and perceived benefit, usability, provider needs, and provider-patient relationship. Clinic-level determinants were limited resources and integration within the health center. Systems-level determinants included medication shortages and stakeholder engagement.

1  
2  
3 Conclusions: Incorporation of these themes will ready ALRITE for field testing. Early  
4  
5 engagement of end-users provides insights critical to the development of tailored mHealth  
6  
7 decision support tools.  
8  
9  
10  
11  
12  
13  
14  
15  
16  
17  
18  
19  
20  
21  
22  
23  
24  
25  
26  
27  
28  
29  
30  
31  
32  
33  
34  
35  
36  
37  
38  
39  
40  
41  
42  
43  
44  
45  
46  
47  
48  
49  
50  
51  
52  
53  
54  
55  
56  
57  
58  
59  
60

For peer review only



### Strengths and limitations of this study

- By using a technology probe and human-centered participatory approach early in mHealth development, we engaged participants and gathered information not only about the ALRITE tool but also contextual factors that are pivotal to the ultimate success of a mHealth application in this setting
- We partnered with local health officials in the planning phase to encourage health worker attendance to information sessions, which translated to enrolling almost all eligible health workers, thus providing a more accurate and complete assessment at each study site
- This study was limited by perspectives at two health centers, which may not reflect regional differences in resource availability, staffing, and health workers' perceptions.
- Health worker perceptions were obtained without experience using ALRITE in clinical practice, which will be a focus of future work.
- We acknowledge that key team members who participated in all aspects of this project are American physicians/researchers who bring a different set of experiences and lens to this work, which may have influenced participants' responses and interpretation, but American team members worked in close partnership with Ugandan team members to ensure shared decision-making and engagement with study participants.

**Keywords:** Community child Health, international health services, paediatric thoracic medicine, respiratory infections, qualitative research, public health, mobile health

## INTRODUCTION

Acute lower respiratory illnesses (ALRI) remain a leading cause of mortality in children under 5, responsible for 15% of all deaths in this age range.<sup>1,2</sup> Over 800,000 young children worldwide die of ALRI each year; 500,000 of these deaths occur in sub-Saharan Africa.<sup>1-5</sup> In Uganda, ALRI is responsible for 11% deaths in children under 5.<sup>5,6</sup> ALRI encompass multiple disease processes that include bacterial pneumonia, viral pneumonia, and wheezing illnesses. Differentiating between these diseases and choosing the appropriate treatment plan is challenging, especially where skilled personnel and diagnostic tools are lacking. The World Health Organization (WHO) Integrated Management of Childhood Illnesses (IMCI) provides guidelines for ALRI diagnosis and management, with emphasis on pneumonia and treatment with antibiotics. The IMCI was updated in 2014 to include assessment of wheezing and treatment with inhaled bronchodilators,<sup>7</sup> but wheezing illness remains underdiagnosed and undertreated in low- and middle-income countries (LMICs).<sup>8,9</sup>

Mobile phone use recently surpassed two-thirds of the global population and over 70% in Uganda<sup>10</sup>, offering opportunities for digital health tools to enhance adherence to guidelines and build capacity through clinician education.<sup>11-16</sup> Importantly, small pilot studies of mHealth tools based on WHO IMCI ALRI guidelines demonstrated promising preliminary results but have not addressed wheezing illness.<sup>17-20</sup> To promote responsible, sustainable, and high impact mHealth interventions in LMICs, the WHO recently released digital health guidelines recommending high quality research in fields of decision support and education.<sup>21</sup>

We developed the Acute Lower Respiratory Illness Treatment and Evaluation (ALRITE) mHealth application as a decision support tool to aid frontline health workers to improve diagnosis and treatment of ALRI in children under 5 years of age, with a particular focus on distinguishing wheezing illness from pneumonia. In order to address potential challenges with

1  
2  
3 widespread ALRITE use, this study sought to understand determinants of successful ALRITE  
4 implementation from the end users' perspective. The objective of this study was to evaluate  
5 health workers' perceptions of feasibility, usability, and acceptability of the ALRITE mHealth tool  
6 in two Ugandan primary care health centers. This user-centered, formative approach will inform  
7 further development of a locally relevant decision support tool to improve the diagnosis and  
8 treatment of ALRI in Ugandan health centers.  
9  
10  
11  
12  
13  
14  
15

## 16 17 18 **METHODS**

### 19 20 **Study design**

21  
22 This study uses a human-centered, or participatory, approach to examine frontline health  
23 workers' perceptions of ALRITE and its impact on their workflows and patient care. We  
24 developed an initial prototype of ALRITE and used it as a technology probe to gather insights  
25 about its feasibility, usability, and acceptability. Technology probes are defined as instruments  
26 to "[collect] information about the use and users of the technology in a real-world setting",  
27 improve the intervention's design by meeting the needs and wishes of the user, and field-test.<sup>22</sup>  
28 We used an exploratory qualitative study design to allow for deeper exploration into feasibility,  
29 usability, and acceptability for the purposes of 1) improving the mHealth tool, 2) identifying  
30 barriers/facilitators beyond the tool itself to inform feasibility and implementation strategies, and  
31 3) determining quantitative outcomes measures for future studies (qual to QUAN mixed  
32 methods approach).<sup>23</sup> The research team determined that quantitative survey data would have  
33 been inadequate to answer our research questions due to lack of depth, opportunity to probe,  
34 and concerns about social desirability bias.  
35  
36  
37  
38  
39  
40  
41  
42  
43  
44  
45  
46  
47  
48  
49  
50

51 We conducted in-depth semi-structured interviews with health facility administrators to  
52 understand clinic context, availability of resources, challenges, day-to-day operations, and  
53 feasibility of ALRITE from a systems standpoint (Supplementary Material). We conducted focus  
54  
55  
56  
57  
58  
59  
60

1  
2  
3 groups with primary care health workers (clinical officers and nurses) to understand how  
4 participants respond to peer responses and the forces that may influence their thinking and  
5 behavior around the app, how this would affect patient-provider interactions, and their reactions  
6 towards technology. All health worker participants had time to practice using ALRITE with  
7 clinical scenarios (Supplementary Material) before focus groups to give participants a better  
8 understanding of the app, its content, and usability to better inform their focus group responses.  
9  
10  
11  
12  
13  
14  
15  
16  
17

### 18 **Study sites**

19 Both study sites were federally funded Health Center IV in Jinja district, Uganda and offer free  
20 healthcare. The peri-urban site is located 15 minutes driving from the city center of Jinja, the  
21 second largest city in Uganda, and the rural site is located 45-60 minutes driving from Jinja.  
22 Both sites have inpatient and outpatient facilities and an operating theater for obstetrics and  
23 urgent surgical cases.  
24  
25  
26  
27  
28  
29  
30  
31

32 The health care delivery system in Uganda has 6 levels that build on the previous level: 1)  
33 Health Center II provides basic outpatient care; 2) Health Center III has maternity services; 3)  
34 Health Center IV has primary care, basic inpatient facilities and emergency obstetric care; 4)  
35 District Hospitals have general surgery, dental services, and diagnostic services (i.e. chest  
36 radiography and laboratory); 5) Regional Referral Hospitals have specialized care; 6) National  
37 Referral Hospital has additional specialized and sub-specialized services.  
38  
39  
40  
41  
42  
43  
44  
45  
46

47 The two specific Health Center IV were selected for this study based on prior research  
48 indicating that 1) adherence to IMCI was low, 2) consultations were performed by health  
49 workers with limited training, 3) antibiotics were over-prescribed, and 4) inhaled bronchodilators  
50 for wheezing illness were not prescribed.<sup>9</sup>  
51  
52  
53  
54  
55  
56  
57  
58  
59  
60

## Participants

We recruited at least 1 health administrator for semi-structured interviews from each study site. Health administrators were clinicians (medical doctors or clinical officers) who serve a director role in leadership and staff supervision at an individual health center, termed locally as “health facility in-charges”. Eligible participants for focus groups were health workers (clinical officers or nurses) who had been working at the study site for at least 6 months and were responsible for outpatient care of children. None had used ALRITE prior. Clinical officers complete a three-year diploma course in clinical medicine. Nurses in these health centers primarily act as clinicians due to staff shortages and task shifting. Prior to data collection, research team members met with officials at the Jinja District Health Office for approval, plan for disseminating study information to participating study sites, and scheduling days for recruitment and data collection. Information sessions were coordinated with help from health administrators at each study site to maximize participation. All health workers were notified about the session dates one week in advance and were invited to attend the information session even if not scheduled to work that day. The study team employed in-person information sessions for recruitment using convenience sampling. Sample size was determined by the number of health workers who showed up the scheduled days of data collection with the goal of recruiting all eligible health workers at each study site. All participants provided a written informed consent in English for their participation.

## ALRITE mHealth tool

Based on a previous mHealth tool, mPneumonia<sup>17 18</sup>, the ALRITE mHealth application was developed for smartphones to help frontline health workers adhere to IMCI guidelines and differentiate wheezing illnesses from pneumonia in children under 5 years of age. ALRITE contains a simple decision tree, a partially automated respiratory rate counter, educational videos (brief clips providing examples of children in respiratory distress), and an adapted

1  
2  
3 respiratory assessment score to determine bronchodilator responsiveness (Figure 1). The  
4 algorithm walks the user through basic demographics, IMCI danger signs, medical history,  
5 physical exam, and bronchodilator assessment (if appropriate). The final diagnoses include  
6 *severe pneumonia or very severe disease, pneumonia +/-, wheezing illness, and cough or cold*  
7 *+/- wheezing illness*. The WHO classification does not include a separate diagnosis of  
8 “wheezing illness” but rather includes the diagnosis and treatment of wheezing as additional  
9 recommendations for the diagnoses of “pneumonia” and “cough or cold”.<sup>7</sup> We added the term  
10 “wheezing illness” to ALRITE diagnoses to prompt health workers to provide bronchodilators  
11 and refer for further assessment as necessary. The app is 27 MB and was downloaded on  
12 supplied Android smartphones for study use.

### 23 24 25 26 **Data collection and management**

27  
28 Prior to data collection, research assistants were trained and pretested focus group/interview  
29 guides through simulations with the research team. Demographic information was collected first  
30 on paper forms, then transferred to REDCap (Research Electronic Data Capture).<sup>24</sup> Unique  
31 identifiers were used for each participant. Focus groups and interviews were performed  
32 primarily in English over the course of one week using interview/focus group guides  
33 (Supplementary information). Prior to focus groups, all health worker participants were given  
34 time to practice using ALRITE by going through at least 2 clinical scenarios individually or in  
35 small groups of up to 3 people (Supplementary information), while members of the study team  
36 (LEE, IN, MR, SAF, BN, ZN) asked for specific feedback, answered questions about the app,  
37 and took notes. We performed a demonstration of ALRITE for participants at the beginning of  
38 interviews and focus groups. Ugandan research assistants did provide clarifications and some  
39 probing in the local language; some participant responses were given in the local language and  
40 translated to English for the study notes. All interviews and focus groups were digitally recorded,  
41 deidentified, and transcribed into English without identifiers by IN, who is fluent in English and  
42  
43  
44  
45  
46  
47  
48  
49  
50  
51  
52  
53  
54  
55  
56  
57  
58  
59  
60

1  
2  
3 the local language. Transcriptions were reviewed by IN and LEE for content and cultural  
4 accuracy. Members of the study team (LEE, IN, MR, SAF) took notes during focus groups and  
5 interviews to augment and clarify the transcribed notes. Hard copy data were securely  
6 transported to Makerere University Lung Institute (Kampala, Uganda) for secure storage. No  
7 personal data will be transferred from the primary institution in Kampala, Uganda.  
8  
9  
10  
11  
12  
13  
14  
15

### 16 **Study team**

17 This was an international collaboration, including experts in public health, pulmonology/asthma,  
18 information and communication technology for development, human-computer interaction, and  
19 community-based interventions. Research assistants BN and ZN from Uganda experienced in  
20 qualitative interviewing and fluent in the local language led focus groups and interviews with the  
21 guidance of LEE, a content expert in the ALRITE app with previous qualitative experience in  
22 technology implementation. SAF provided qualitative expertise in design, data collection, and  
23 analysis. RN provided local expertise in health systems, qualitative design and interview guides,  
24 and pediatrics. IN provided local research coordination and knowledge of the health system.  
25 Pediatric expertise was provided by RN and JS with additional pediatric pulmonology expertise  
26 by MR and LEE. RA was instrumental in the design of mPneumonia and senior author on both  
27 manuscripts.<sup>17 18</sup> ALRITE app design and development was performed by AK, AV, and RA, with  
28 additional expertise in usability testing and human-centered design by AV. We acknowledge  
29 that key team members who participated in all aspects of this project are American physicians  
30 and researchers who bring a different set of experiences and lens to this work, and that our  
31 positionality may have influenced participants' responses and interpretation. Working in  
32 partnership with our Ugandan team was critical to ensure shared decision-making and our  
33 ability to work closely with the clinicians.  
34  
35  
36  
37  
38  
39  
40  
41  
42  
43  
44  
45  
46  
47  
48  
49  
50  
51  
52  
53  
54  
55

### 56 **Analysis**

1  
2  
3 We analyzed our detailed notes and transcripts using a deductive thematic approach, whereby  
4 the researchers LEE, SAF, and IN examined the data to identify common themes for each of the  
5 research questions based on a similar framework of a previously published mHealth  
6 technology.<sup>17 18</sup> During the analysis, the team documented outlier or dissenting perspectives in  
7 order to provide a more complete picture of participant responses to ALRITE. First, LEE and  
8 SAF read through each of the transcripts and set of notes and then we developed a provisional  
9 framework based on primary research questions. LEE, SAF, MR, IN, BN, and ZN held team  
10 meetings following each day of data collection to compile notes, review emerging themes, and  
11 refine the coding framework. Codes were aggregated into major themes and subthemes by first  
12 annotating an online document of transcripts, then reorganizing into a separate document,  
13 similar to but without the use of coding software. Additional meetings with the research team  
14 allowed for further refinement of themes and subthemes. Transcripts were reread to ensure that  
15 preliminary results represented the majority of user feedback. The quotes were chosen to  
16 confirm and highlight themes and introduce diverging viewpoints not previously captured. The  
17 Standards for Reporting Qualitative Research (SRQR) were used to guide reporting.<sup>25</sup>

## 36 **Ethics**

37  
38 The study was approved by the Mulago Hospital Research and Ethics Committee and Uganda  
39 National Council for Science and Technology (HS2692). The study was reviewed and received  
40 exempt status from the University of Washington (STUDY0007895). Written informed consent  
41 was obtained from all participants in accordance with international and local regulations.

## 49 **Patient and Public involvement**

50  
51 While not involved in the initial design, conduct, or reporting, study participants are involved in  
52 ultimate design and implementation of the intervention and are included in the dissemination  
53 plan, along with district- and national-level health system members and patient caregivers.



## RESULTS

### Participant & setting characteristics

In January 2020, we enrolled 28 healthcare provider participants across 2 health centers in Uganda. Key stakeholders, including 3 health administrators (HA), took part in individual in-depth interviews, while 5 clinical officers and 20 nurses (HW) took part in 3 focus groups (Table 1). Based on recommendations from the health administrators from each site, we conducted separate focus groups for clinical officers (n=3) and nurses (n=10) at the peri-urban site to limit concern for potential power dynamic, but this was not deemed a concern at the rural site where one focus group was recommended. Interviews were approximately 30 minutes long, while focus groups were approximately 1.5 hours in length.

**Table 1. Participant characteristics**

|                                         | Rural Site  | Peri-urban Site |
|-----------------------------------------|-------------|-----------------|
| <b><i>In-depth interviews</i></b>       | <b>n=1</b>  | <b>n=2</b>      |
| <b>Role</b>                             |             |                 |
| Medical officer                         | 0           | 2               |
| Clinical officer                        | 1           | 0               |
| <b>Male</b>                             | 1           | 2               |
| <b><i>Focus groups</i></b>              | <b>n=12</b> | <b>n=13</b>     |
| <b>Role</b>                             |             |                 |
| Clinical officer                        | 2           | 3               |
| Nurse                                   | 10          | 10              |
| <b>Female</b>                           | 9           | 10              |
| <b>Age</b>                              |             |                 |
| <30 years                               | 5           | 5               |
| 30-40 years                             | 5           | 6               |
| >40 years                               | 2           | 2               |
| <b>Experience in health care, years</b> |             |                 |
| < 5                                     | 2           | 3               |
| 5-10                                    | 8           | 4               |
| > 10                                    | 2           | 6               |

We identified several themes impacting the development and implementation of ALRITE in Ugandan health centers from the perspective of health administrators and frontline health

1  
2  
3 workers. Themes were organized by a social ecological model of determinants: individual, clinic,  
4 and health system (Figure 2). Individual-level determinants were acceptability and perceived  
5 benefit, usability, provider needs, and provider-patient relationship. Clinic-level determinants  
6 were limited resources, integration within the health center. Systems-level determinants  
7 included medication shortages and stakeholder engagement. Each theme is presented below in  
8 greater detail and with direct quotes that typify respondent comments.  
9  
10  
11  
12  
13  
14  
15  
16  
17

### 18 **Individual-level**

#### 19 Acceptability & perceived benefit of ALRITE

20 All health workers indicated they would like to have ALRITE available to use in their healthcare  
21 setting. Health workers also reported that they appreciated that ALRITE reminded them of  
22 important medical questions to ask and key components of the physical exam.  
23  
24  
25  
26  
27  
28  
29

30 “It helps us to remember the clear assessment of these children because at times  
31 you are rushing and forget to assess something. You go with what you see quickly,  
32 but the app gives you the procedure to follow. It also helps in giving the right doses.”  
33  
34  
35  
36

37 HW-002-FG2  
38  
39  
40

41 They responded positively to the integrated respiratory rate counter. Health workers’ eagerness  
42 to learn was apparent during focus groups and interviews. Indeed, many health workers  
43 reported the educational videos were one of their favorite features of ALRITE. In addition to data  
44 gathering, health workers liked the information management capabilities, including medication  
45 dosing, which is generally age- or weight-based for children.  
46  
47  
48  
49  
50  
51  
52  
53  
54  
55  
56  
57  
58  
59  
60

1  
2  
3 “The part of the app that I like mainly are the videos. It is good because it helps  
4 diagnosing and guides through the right treatment hence saving patient time.” HA-  
5  
6  
7 001  
8  
9

10  
11 “[The respiratory rate counter] is convenient because you may not have a watch.”  
12  
13  
14 HW-007-FG3.  
15

16  
17  
18 It is important to acknowledge the novelty of ALRITE as a mHealth app technology likely  
19  
20 contributed to high acceptability by health workers as well.  
21  
22  
23

24 “[Providers] usually like new technology, I think they will be excited to use it and  
25  
26 therefore they are likely to download [the app]. In addition, people prefer digital  
27  
28 information than opening and reading what is in the [IMCI] book.” HA-003  
29  
30  
31

32  
33 Respondents had ideas for improving acceptability, appropriateness, and potential benefit of  
34  
35 ALRITE. Health workers asked for additional automated or semi-automated smartphone tools,  
36  
37 such as pulse oximetry or digital auscultation to be integrated into ALRITE. Multiple health  
38  
39 workers commented on the potential for storage of clinical information. One health worker  
40  
41 wanted to use it as a personal quality control device to review his previous diagnoses and  
42  
43 treatment plans. A few wanted the app expanded to other disease processes and age groups.  
44  
45 Some health workers suggested incorporating additional educational components targeted to  
46  
47 patients and families. One health worker suggested incorporating risk stratification for children  
48  
49 with chronic disease and environmental risk factors (i.e. smoke exposure, crowded housing) in  
50  
51 order to focus on prevention.  
52  
53  
54  
55  
56  
57  
58  
59  
60

1  
2  
3 “[In the app], we are missing [a question on] the type of fuel used at home to cook  
4 and source of light. Some produce a lot of smoke. [By offering recommendations,  
5 families] can change the way of cooking, hence reducing exposures. This could help  
6 in prevention [of respiratory diseases]. We therefore can make a recommendation  
7 and follow up in about 6 months.” HW-005-FG3  
8  
9  
10  
11  
12  
13  
14  
15

### 16 ALRITE usability

17 We defined usability as “the design factors that affect the user experience of operating the  
18 application’s device and navigating the application for its intended purpose.”<sup>18</sup> ALRITE features  
19 that contributed to a positive user experience included overall design, simplicity, flow, and clarity  
20 of diagnosis. Generally, health workers thought the app was easy to follow and would be quick  
21 to get to diagnosis.  
22  
23  
24  
25  
26  
27  
28  
29

30 “It saves time. You diagnose very fast and you are able to know the treatment to give  
31 so it improves on the appropriate management of patients.” HW-001-FG1  
32  
33  
34  
35  
36

37 When given the opportunity to use the mHealth tool, health workers who owned smartphones  
38 were more facile with ALRITE than those who owned simple mobile phones. Importantly, after  
39 practicing with ALRITE and receiving coaching from the research team, all health workers  
40 became more facile using ALRITE. Proficiency with the app was not formally tested.  
41  
42  
43  
44  
45  
46

47 Health workers provided valuable feedback to improve the usability of ALRITE, including minor  
48 changes to the visual display, layout, and flow of the app. For example, health workers  
49 recommended larger font for better visualization. They also recommended using a patient age  
50 group instead of date of birth for 2 reasons: 1) health workers had difficulty using the calendar  
51  
52  
53  
54  
55  
56  
57  
58  
59  
60

1  
2  
3 function, and 2) caregivers may not know a child's date of birth, so asking for a child's age  
4 group is standard practice.  
5  
6  
7

#### 8 9 Provider-specific needs

10  
11 Another important consideration to ALRITE acceptability is the end user's experience with  
12 smartphones. In our study, all health workers owned a mobile phone, of which approximately  
13 60% owned a smartphone. Most who owned a smartphone used social media or communication  
14 apps. No health workers we spoke with were using mHealth apps, and only a few had heard of  
15 these types of apps.  
16  
17  
18  
19  
20  
21  
22  
23

24 All those with smartphones preferred that ALRITE be directly downloaded to their personal  
25 devices compared to clinic-supplied devices, as they would be more likely to use the app if it  
26 were readily available on their own smartphones. Additionally, if health workers used the app on  
27 their own smartphones rather than a clinic-supplied device, they said they would be less likely to  
28 lose or misplace the device. However, one health worker reminded the group that not everyone  
29 has a smartphone, so smartphones would need to be made available to individuals without a  
30 personal device. Health workers were pleased that the size of the app was only (27Mb).  
31  
32  
33  
34  
35  
36  
37  
38  
39  
40

41 The provider's training level was also an important factor. In different levels of health centers in  
42 Uganda, there are health workers with varying levels of training and provider roles, ranging from  
43 nurse to medical officer. End users with limited clinical training may be more likely to use  
44 ALRITE in practice to help with clinical decision-making than others with more training or clinical  
45 experience who may not think additional clinical decision support adds value to their clinical  
46 care.  
47  
48  
49  
50  
51  
52  
53  
54  
55  
56  
57  
58  
59  
60

1  
2  
3 “There are incidences when the doctors are not at the clinic and the nurse needs to  
4 make a diagnosis and give treatment as well. ALRITE will save time.” HA-001  
5  
6  
7  
8

9  
10 **Provider-patient relationship**

11 Health workers had some concerns regarding ALRITE use in their clinic. Some thought that  
12 using the app in front of patients and families would reduce the quality and quantity of personal  
13 interaction at a clinic visit. Some also expressed concern that if they used ALRITE to help make  
14 clinical decisions, families would lose trust in health workers’ ability to diagnose and treat.  
15  
16 However, one respondent also suggested that the app could be used as an educational tool for  
17 families and help build trust during the visit.  
18  
19  
20  
21  
22  
23  
24  
25

26 “The first challenge is on the side of our clients. When you are busy using the app,  
27 the client might think you’re neglecting her or him and you’re busy on WhatsApp, and  
28 secondly, a client might think you’re not knowledgeable enough since you’re using a  
29 phone and lose trust in you thinking you don’t know what to do... But I think I can  
30 start by engaging the patients and informing them that what I am going to do is for  
31 your good, I am not just looking for answers but rather improving diagnosis for your  
32 child.” HW-003-FG2  
33  
34  
35  
36  
37  
38  
39  
40  
41  
42

43 **Clinic-level**

44  
45 **Limited resources**

46  
47 *High patient volume and limited staffing*

48  
49 At the peri-urban site, 100-300 patients are seen in the ambulatory clinic daily, 60% of which are  
50 children (IC-001). Similarly, at the rural site, a stakeholder reported, “we see about 100-200  
51 patients daily... and about 45% of these are children less than 5 years.” (IC-003). Stakeholders  
52 identified the most common pediatric conditions: malaria, ALRI, and diarrhea. A combination of  
53  
54  
55  
56  
57  
58  
59  
60

1  
2  
3 clinical officers and nurses without specialty pediatric training see pediatric patients at both  
4 sites. The peri-urban site also staffs a few general medical doctors, but they are not always on  
5 site. All health workers reported they received IMCI training, from which Uganda Clinical  
6 Guidelines are derived.<sup>26</sup> Health workers reported that visit length typically ranges from 10-15  
7 minutes, but a few reported they often take less than 10 minutes.  
8  
9  
10  
11  
12

13  
14  
15  
16 “In assessing children, we have a challenge with patient load with few trained health  
17 workers who can assess patients. It’s a facility in a semi-urban area so the numbers are  
18 big with few health workers, and treatment is not always available.” HA-001  
19  
20  
21  
22  
23

#### 24 *Limited resources for the diagnosis of pediatric respiratory disease*

25  
26 To diagnose respiratory disease, both sites reported use of stethoscopes, although these are  
27 not universally available, nor are they required to use IMCI. They rely on personal watches to  
28 count respiratory rate, but not everyone has a watch. Pulse oximetry is not typically available.  
29  
30  
31  
32  
33

34  
35 “We have one pulse oximeter in [the operating] theater, but we are currently not using it  
36 because it gives confusing results.” HA-003  
37  
38  
39  
40

41  
42 “It is not a problem [to use a stethoscope], but if it is not available, we resort to the IMCI  
43 approach where you depend on a physical exam [without a stethoscope]. In addition,  
44 what compromises quality is the number of patients waiting in the line to be reviewed,  
45 and you may end up missing out on an important indicator.” HW-002-FG3  
46  
47  
48  
49  
50

#### 51 *Limited resources and training affecting adherence to WHO IMCI*

52  
53 All health workers received WHO IMCI training. However, they reported that adherence to IMCI  
54 can be challenging for a number of reasons. Firstly, IMCI incorporates respiratory rate and  
55  
56  
57  
58  
59  
60

1  
2  
3 evaluation of respiratory distress into its clinical decision algorithm. Some health workers  
4 reported that counting respiratory rate is impossible without a watch or timer. Secondly, IMCI  
5 recommends evaluation of wheezing, but this exam finding is challenging to diagnose,  
6 especially without a stethoscope.  
7  
8  
9  
10

11  
12  
13  
14 “[Chest] indrawing is easier [to assess] compared to wheezing.” HW-001-FG3  
15

16  
17  
18 “Monitoring during the care of these children or reassessing the vitals is a challenge.”  
19  
20 HW-003-FG3  
21

22  
23  
24 Health workers frequently denied opportunities for robust continuing medical education or  
25 refresher trainings for IMCI.  
26  
27

28  
29  
30 “We have sent people for IMCI training. We also have a national trainer at the facility  
31 who organizes [continuous medical education], but the turnout of health workers is  
32 usually not good. Usually, when people do something for many years, they tend to  
33 think there is nothing new they can learn.” HA-003  
34  
35  
36  
37  
38  
39  
40

41 Thirdly, availability and use of the IMCI materials are limited in health centers. IMCI can be  
42 available in paper or electronic form. However, health workers reported that the paper form is  
43 not convenient to use due to the size of the booklet and the likelihood of misplacing it. One  
44 health administrator reported that his health center had IMCI installed on a laptop, but the laptop  
45 broke and was not replaced.  
46  
47  
48  
49  
50

51  
52  
53 ALRITE integration into existing health system

54  
55  
56 *Change to workflow*  
57  
58



1  
2  
3 Integrating ALRITE into clinical practice will inevitably change clinic workflow. It may contribute  
4 to duplicative work because the current system includes entering data into a written health  
5 record. Interestingly, this was not brought up as a concern during focus groups or interviews.  
6  
7 Furthermore, using a new technology will be slow at first and may make patient encounters  
8 longer rather than shorter in an already busy clinic. Health workers reported that they would  
9 need to practice with ALRITE prior to using it with patients to improve work efficiency.  
10  
11  
12  
13  
14  
15  
16  
17

18 “At first, it’s likely to slow the work because we may be learning the app but with time  
19 it will become part of us, and we become part of it so it will ease the work... we need  
20 to be familiar with it to help us save time so that patients do not see us take a lot of  
21 time on the phones.” HW-002-FG2  
22  
23  
24  
25  
26  
27

28 “I think we shall have to sort out those with respiratory illnesses at triage which is  
29 different from what is being done currently where all patients follow the same  
30 assessment route regardless of condition.” HW-001-FG1  
31  
32  
33  
34  
35  
36

37 Furthermore, current practice in Ugandan health centers does not routinely include  
38 reassessment of patients after a bronchodilator trial, which is necessary to ascertain whether  
39 patients would benefit from treatment with a bronchodilator. Most health workers thought it  
40 would be feasible to reassess patients if warranted; however, a few health workers reported that  
41 many patients leave after the initial assessment. Lack of reassessment would limit providers’  
42 ability to determine bronchodilator responsiveness, an important factor in diagnosing wheezing  
43 illnesses and asthma in young children and therefore an important component of ALRITE.  
44  
45  
46  
47  
48  
49  
50  
51  
52

53 “We reassess only those who are admitted on the wards. We reassess if the child  
54 worsens, but if they are improving, we reassess them the next day during the ward  
55  
56  
57  
58  
59  
60

1  
2  
3 rounds. I think it's important to integrate the app into the system because it gives  
4 reminders about reassessing a patient." HA-001  
5  
6  
7

8  
9 "There is no opportunity [to reassess children] because most of them come from far  
10 and do not usually come back [after treatment is prescribed]." HW-001-FG3  
11  
12  
13

### 14 15 *Triage*

16 One current challenge and potential opportunity for ALRITE integration is in patient triage.  
17  
18 Health administrators reported no formal triage process to risk-stratify patients as they present  
19 to care. There is also no separate pediatric clinic. All patients are seen in the order they arrive,  
20 whether adults or children. One health administrator saw ALRITE implementation as an  
21 opportunity to establish triage at their health center. He suggested that ALRITE could be used  
22 earlier when pediatric patients arrive to the clinic to prioritize those with WHO danger signs and  
23 acute respiratory distress.  
24  
25  
26  
27  
28  
29  
30  
31  
32  
33  
34

35 "[Challenges include] lack of a dedicated clinician to manage children and lack of  
36 enough consultation rooms. There is also a knowledge gap in assessing children. We do  
37 not have a triage area where we are able to prioritize those with worse conditions. We  
38 usually just do visual observation of who is an emergency situation instead of taking  
39 medical history and a few vitals. The other issue is we don't differentiate children from  
40 adults, they all go through the same entry point... The other [issue] is lack of an  
41 emergency unit for children with severe difficulty in breathing." HA-003  
42  
43  
44  
45  
46  
47  
48  
49  
50

### 51 **Systems-level**

52 Medication shortages impacting ALRITE management  
53  
54  
55  
56  
57  
58  
59  
60

1  
2  
3 Aside from features of ALRITE itself, we explored other factors that would impact feasibility of  
4 ALRITE at a systems level. ALRITE recommends treatment for children with respiratory  
5 illnesses, including antibiotics for pneumonia and inhaled bronchodilators with/without systemic  
6 corticosteroids for wheezing. Oral salbutamol is generally available at the health centers and  
7 sometimes used for children but carries a high side effect profile and is not recommended for  
8 acute wheezing in children.<sup>27 28</sup> Health administrator at both sites reported very limited  
9 availability of inhaled bronchodilators (2-3 inhalers every 2 months). Health workers may  
10 prescribe medications if not available on site, but this requires family members to pay out-of-  
11 pocket for prescribed medications at an off-site pharmacy or higher-level health center. Even if  
12 ALRITE improves diagnosis of wheezing illness, its impact and feasibility will be greatly limited if  
13 appropriate treatment is not readily available.  
14  
15  
16  
17  
18  
19  
20  
21  
22  
23  
24  
25  
26  
27

28 “We are not independent when it comes to drugs. Supplies are from National Medical  
29 Stores, and they usually give what they have unless you have an independent  
30 source outside of the usual supply chain.” HA-002  
31  
32  
33  
34  
35  
36

37 “The app talks about the bronchodilator, but it doesn’t talk about other drugs to give.  
38 Here at the low-level facilities we do not have the bronchodilators.” HW-002-FG1  
39  
40  
41  
42

### 43 Stakeholder buy-in

44 While not a common theme, one health administrator emphasized the importance of engaging  
45 stakeholders early for successful implementation. Specifically, the administrator explained that  
46 the Ministry of Health in Uganda and local district health officials would need to approve the app  
47 prior to large scale distribution across public and private facilities. Additionally, support at these  
48 leadership levels will be critical for widespread uptake and implementation of ALRITE.  
49  
50  
51  
52  
53  
54  
55  
56  
57  
58  
59  
60

## DISCUSSION

In this study, we identified key determinants towards successful implementation of ALRITE, our mHealth decision support tool, from frontline health workers' perspectives (Figure 2). In addition to ALRITE-specific determinants, health workers and administrators identified important individual-level, clinic-level, and health systems-level determinants and offered innovative ideas for future app development. Overall, these results support ongoing development of ALRITE for potential integration into routine clinical care and underscore the importance of user-centered design early in development prior to implementation of a new technology. ALRITE, if successfully implemented, has the potential to improve childhood morbidity and mortality in three major ways: 1) increased awareness, diagnosis and treatment of wheezing illness, 2) improved IMCI guideline adherence through prompts and education, and 3) effective triage of critically ill infants and children. Potential challenges identified include changes to the provider-patient relationship, time constraints, and medication shortages. However, through thoughtful design and implementation, ALRITE has potential to overcome these challenges by enhancing the provider-patient relationship through education and improved management, improving clinical efficiency through a streamlined process, and increasing supply of life-saving medications such as inhaled bronchodilators through increased awareness, advocacy, and demand.

Additional strengths of the study include using a technology probe and human-centered, participatory approach early in mHealth development to engage participants and gather information not only about the specific mHealth tool but also to build an underpinning knowledge of factors that are pivotal to the ultimate success of a mHealth application. We partnered with local health officials in the planning phase to encourage health worker attendance to information sessions, which translated in almost all eligible health workers at each site participating in the study to provide a more accurate and complete on-the-ground assessment at each study site.

1  
2  
3 We also included health administrators as participants to provide a broader understanding of the  
4 clinic context, challenges, day-to-day operations, and feasibility of ALRITE from a systems  
5 standpoint, adding a unique perspective to the health workers' responses.  
6  
7  
8  
9

10  
11 Previous studies have also evaluated mHealth decision support based on WHO IMCI.<sup>17-19</sup> The  
12 predecessor to ALRITE, mPneumonia, demonstrated high acceptability and usability in pilot  
13 studies in Ghana.<sup>17 18</sup> Unlike ALRITE, mPneumonia was designed to use on clinic-supplied  
14 tablets. Health workers were not as familiar with smartphones and had difficulty navigating the  
15 application and general tablet use.<sup>17</sup> Furthermore, health workers expressed potential  
16 challenges of mPneumonia including access to electricity and added time to patient  
17 encounters.<sup>18</sup> The disparate results between mPneumonia and ALRITE likely reflects interval  
18 improvements in devices and software as well as additional experience with smartphones given  
19 growing mobile phone use worldwide.  
20  
21  
22  
23  
24  
25  
26  
27  
28  
29  
30

31  
32 Two important systematic reviews of health workers' perspectives using mHealth in primary  
33 care highlighted similar themes.<sup>21 29</sup> Decision support mHealth tools achieved high acceptability,  
34 with health workers reporting increased efficiency, better access to information, and improved  
35 adherence to guidelines.<sup>21</sup> Similar to our results, some health workers were concerned mHealth  
36 may negatively impact the provider-patient relationship,<sup>21</sup> but this concern has not been  
37 evaluated by patients or caregivers. Contrary to our results, some health workers were  
38 concerned the algorithm was too prescriptive for clinical decision making.<sup>21</sup> We found that health  
39 workers appreciated the simple ALRITE algorithm, which may reflect the limited clinical training  
40 in our study population. Additional factors influencing health workers' acceptability of mHealth  
41 technologies were cost to the health worker, previous mobile phone experience, and increased  
42 time/workload.<sup>29</sup> While our study did not evaluate cost, as ALRITE would be a free application,  
43 health workers did appreciate that ALRITE had a small footprint (27 Mb) so would not require  
44  
45  
46  
47  
48  
49  
50  
51  
52  
53  
54  
55  
56  
57  
58  
59  
60

1  
2  
3 much data or take up much smartphone memory. Conversely, health worker perceptions of  
4 ALRITE did not change based on prior mobile phone experience, but those with smartphone  
5 experience were much more facile with the app.  
6  
7  
8  
9

10  
11 There has been a recent explosion of digital health tools for use in LMICs, but evidence on  
12 effectiveness and scale-up has been lacking.<sup>11 16 30 31</sup> An early human-centered approach to  
13 evaluation is critical to better understand determinants of successful implementation and to  
14 guide further mHealth design. Therefore, we included health administrators and frontline health  
15 workers early in the development of ALRITE as participants to better inform acceptability,  
16 appropriateness, and feasibility of its use in Ugandan health centers. Through stakeholder  
17 interviews and health worker focus groups, we not only received important feedback to improve  
18 ALRITE, but also gained a richer understanding of the health setting and potential systems-  
19 based and individual level challenges to implementation.  
20  
21  
22  
23  
24  
25  
26  
27  
28  
29  
30

31  
32 This study had important limitations. First, perceptions of health workers were limited to two  
33 health facilities in Uganda. We purposefully chose one peri-urban and one rural health center to  
34 better understand differences in resource availability, staffing, and health workers' perceptions.  
35 However, there may be additional regional differences in perceptions of and comfort with  
36 ALRITE that have yet to be explored. Secondly, it may be possible that we did not capture the  
37 full breadth of perspectives, as health workers with dissenting opinions may not have felt  
38 comfortable speaking up during focus groups. We tried to address this by probing for dissenting  
39 opinions during focus groups and while health workers were practicing with the app in smaller  
40 groups. Thirdly, we did not perform formal quantitative usability evaluations. A formal evaluation  
41 of end user proficiency was not the objective of this study because the ALRITE app was still in  
42 the prototype phase. Finally, health worker perceptions were obtained without experience using  
43  
44  
45  
46  
47  
48  
49  
50  
51  
52  
53  
54  
55  
56  
57  
58  
59  
60

1  
2  
3 ALRITE in clinical practice. This understanding of feasibility in clinical care will be a major focus  
4  
5 of future work.  
6  
7  
8

9  
10 Next steps include updating ALRITE based on user feedback and field testing with frontline  
11  
12 health workers. We will also address important potential barriers for implementation, including  
13  
14 engaging caregivers, streamlining the ALRITE app to limit any negative effect on existing  
15  
16 workflow, developing training programs, ensuring readily available technical support, and  
17  
18 engaging key stakeholders at the Uganda Ministry of Health and district health leadership to  
19  
20 support further research, medication supply, and ultimate implementation of ALRITE.  
21  
22  
23

## 24 **CONCLUSION**

25  
26 Taken together, these results provide a detailed, on-the-ground assessment of the opportunities  
27  
28 and challenges in the respiratory assessment, diagnosis and treatment of ALRI in young  
29  
30 children. Further, the engagement of health workers and richness of data collected support the  
31  
32 use of human-centered approaches early-on to identify factors that are pivotal to success of a  
33  
34 mHealth application. Finally, our results support the continued development of tailored mHealth  
35  
36 tools for decision support in LMICs based on high user acceptability and usability.  
37  
38  
39  
40  
41  
42  
43  
44  
45  
46  
47  
48  
49  
50  
51  
52  
53  
54  
55  
56  
57  
58  
59  
60

### **Data availability**

Data supporting the findings are available within the manuscript. Additional quotes are available upon reasonable request to the corresponding author.

### **Acknowledgements**

We would like to sincerely thank all health workers and health facility in-charges who participated in this study. We are also grateful to the Jinja District Health Office who gave permission and support to conduct the study.

### **Author contributions**

LEE, MR, JWS, AV, RA, and RN contributed to the concept and study design. AJK developed the mobile health application with mentorship from AV and RA. LEE, IN, and RN coordinated and supervised data collection from the sites. LEE, MR, SAF, IN, BN, and ZN performed data collection. LEE, SAF, and IN analyzed the data, and all authors contributed to interpretation. LEE wrote the draft of the manuscript. RN provided oversight of the project. All authors worked collaboratively to review, edit, and approve the final manuscript.

### **Competing interests**

The authors report no competing interests.

### **Funding**

This work was supported by the University of Washington Global Innovation Fund, the Firland Foundation, and the Arthur Rosenfeld Endowment for Pediatric Pulmonary Fellows.



## References

1. Liu L, Oza S, Hogan D, et al. Global, regional, and national causes of child mortality in 2000–13, with projections to inform post-2015 priorities: an updated systematic analysis. *The Lancet* 2015;385(9966):430-40. doi: 10.1016/s0140-6736(14)61698-6
2. GBD 2015 Child Mortality Collaborators. Global, regional, national, and selected subnational levels of stillbirths, neonatal, infant, and under-5 mortality, 1980-2015: a systematic analysis for the Global Burden of Disease Study 2015. *Lancet (London, England)* 2016;388(10053):1725-74. doi: 10.1016/s0140-6736(16)31575-6 [published Online First: 2016/10/14]
3. Walker CLF, Rudan I, Liu L, et al. Global burden of childhood pneumonia and diarrhoea. *The Lancet* 2013;381(9875):1405-16. doi: 10.1016/s0140-6736(13)60222-6
4. Zar HJ, Ferkol TW. The global burden of respiratory disease-impact on child health. *Pediatr Pulmonol* 2014;49(5):430-4. doi: 10.1002/ppul.23030 [published Online First: 2014/03/13]
5. McAllister DA, Liu L, Shi T, et al. Global, regional, and national estimates of pneumonia morbidity and mortality in children younger than 5 years between 2000 and 2015: a systematic analysis. *The Lancet Global Health* 2019;7(1):e47-e57. doi: 10.1016/s2214-109x(18)30408-x
6. IHME. Uganda Country Profile 2016 [updated 2016. Available from: <http://www.healthdata.org/uganda> accessed October 19 2018.
7. World Health Organization. Integrated Management of Childhood Illness, 2014.
8. Nantanda R, Tumwine JK, Ndeezi G, et al. Asthma and pneumonia among children less than five years with acute respiratory symptoms in Mulago Hospital, Uganda: evidence of under-diagnosis of asthma. *PLoS One* 2013;8(11):e81562. doi: 10.1371/journal.pone.0081562 [published Online First: 2013/12/07]

- 1  
2  
3 9. Kjaergaard J, Anastasaki M, Stubbe Ostergaard M, et al. Diagnosis and treatment of acute  
4  
5 respiratory illness in children under five in primary care in low-, middle-, and high-income  
6  
7 countries: A descriptive FRESH AIR study. *PLoS One* 2019;14(11):e0221389. doi:  
8  
9 10.1371/journal.pone.0221389 [published Online First: 2019/11/07]
- 10  
11 10. (CIPESA) TCoIIPfEaSA. National Information Technology Survey 2017/18 Report: CIPESA,  
12  
13 2018:274.
- 14  
15 11. Agarwal S, Perry HB, Long LA, et al. Evidence on feasibility and effective use of mHealth  
16  
17 strategies by frontline health workers in developing countries: systematic review. *Trop*  
18  
19 *Med Int Health* 2015;20(8):1003-14. doi: 10.1111/tmi.12525
- 20  
21 12. Kallander K, Tibenderana JK, Akpogheneta OJ, et al. Mobile health (mHealth) approaches  
22  
23 and lessons for increased performance and retention of community health workers in  
24  
25 low- and middle-income countries: a review. *J Med Internet Res* 2013;15(1):e17. doi:  
26  
27 10.2196/jmir.2130
- 28  
29 13. Lodhia V, Karanja S, Lees S, et al. Acceptability, Usability, and Views on Deployment of  
30  
31 Peek, a Mobile Phone mHealth Intervention for Eye Care in Kenya: Qualitative Study.  
32  
33 *JMIR mHealth and uHealth* 2016;4(2):e30. doi: 10.2196/mhealth.4746 [published Online  
34  
35 First: 2016/05/11]
- 36  
37 14. Medhanyie AA, Little A, Yebyo H, et al. Health workers' experiences, barriers, preferences  
38  
39 and motivating factors in using mHealth forms in Ethiopia. *Human Resources for Health*  
40  
41 2015;13(2) doi: doi:10.1186/1478-4491-13-2
- 42  
43 15. Velez O, Okyere PB, Kanter AS, et al. A usability study of a mobile health application for  
44  
45 rural Ghanaian midwives. *Journal of midwifery & women's health* 2014;59(2):184-91. doi:  
46  
47 10.1111/jmwh.12071 [published Online First: 2014/01/10]
- 48  
49 16. Aranda-Jan CB, Mohutsiwa-Dibe N, Loukanova S. Systematic review on what works, what  
50  
51 does not work and why of implementation of mobile health (mHealth) projects in Africa.  
52  
53 *BMC public health* 2014;144:188.
- 54  
55  
56  
57  
58  
59  
60

- 1  
2  
3 17. Ginsburg AS, Delarosa J, Brunette W, et al. mPneumonia: Development of an Innovative  
4  
5 mHealth Application for Diagnosing and Treating Childhood Pneumonia and Other  
6  
7 Childhood Illnesses in Low-Resource Settings. *PLoS One* 2015;10(10):e0139625. doi:  
8  
9 10.1371/journal.pone.0139625 [published Online First: 2015/10/17]  
10
- 11 18. Ginsburg AS, Tawiah Agyemang C, Ambler G, et al. mPneumonia, an Innovation for  
12  
13 Diagnosing and Treating Childhood Pneumonia in Low-Resource Settings: A Feasibility,  
14  
15 Usability and Acceptability Study in Ghana. *PLoS One* 2016;11(10):e0165201. doi:  
16  
17 10.1371/journal.pone.0165201  
18
- 19 19. Rambaud-Althaus C, Shao A, Samaka J, et al. Performance of Health Workers Using an  
20  
21 Electronic Algorithm for the Management of Childhood Illness in Tanzania: A Pilot  
22  
23 Implementation Study. *Am J Trop Med Hyg* 2017;96(1):249-57. doi: 10.4269/ajtmh.15-  
24  
25 0395  
26  
27
- 28 20. Keitel K, D'Acremont V. Electronic clinical decision algorithms for the integrated primary care  
29  
30 management of febrile children in low-resource settings: review of existing tools. *Clin*  
31  
32 *Microbiol Infect* 2018;24(8):845-55. doi: 10.1016/j.cmi.2018.04.014 [published Online  
33  
34 First: 2018/04/24]  
35  
36
- 37 21. WHO guideline: recommendations on digital interventions for health system strengthening.  
38  
39 Geneva: World Health Organization 2019.  
40
- 41 22. Hutchinson H, Mackay W, Westerlund B, et al. Technology probes: inspiring design for and  
42  
43 with families. Proceedings of the SIGCHI Conference on Human Factors in Computing  
44  
45 Systems. Ft. Lauderdale, Florida, USA: Association for Computing Machinery, 2003:17-  
46  
47 24.  
48
- 49 23. Creswell JW, Plano Clark VL. Designing and conducting mixed methods research. Third  
50  
51 edition. ed. Thousand Oaks, California: SAGE 2018.  
52
- 53 24. Harris PA, Taylor R, Thielke R, et al. Research electronic data capture (REDCap)--a  
54  
55 metadata-driven methodology and workflow process for providing translational research  
56  
57  
58  
59  
60

- 1  
2  
3 informatics support. *J Biomed Inform* 2009;42(2):377-81. doi: 10.1016/j.jbi.2008.08.010  
4  
5 [published Online First: 2008/10/22]  
6  
7 25. O'Brien BC, Harris IB, Beckman TJ, et al. Standards for reporting qualitative research: a  
8  
9 synthesis of recommendations. *Acad Med* 2014;89(9):1245-51. doi:  
10  
11 10.1097/ACM.0000000000000388 [published Online First: 2014/07/01]  
12  
13 26. Uganda Clinical Guidelines. Fourth ed. Kampala, Uganda: Ministry of Health Uganda 2016.  
14  
15 27. Global Strategy for Asthma Management and Prevention: MCR VISION, Inc. 2006.  
16  
17 28. World Health Organization Model List of Essential Medicines for Children. 7th Edition ed.  
18  
19 Geneva: World Health Organization 2019.  
20  
21 29. Odendaal WA, Anstey Watkins J, Leon N, et al. Health workers' perceptions and  
22  
23 experiences of using mHealth technologies to deliver primary healthcare services: a  
24  
25 qualitative evidence synthesis. *Cochrane Database Syst Rev* 2020;3:CD011942. doi:  
26  
27 10.1002/14651858.CD011942.pub2 [published Online First: 2020/03/28]  
28  
29 30. Tomlinson M, Rotheram-Borus MJ, Swartz L, et al. Scaling up mHealth: where is the  
30  
31 evidence? *PLoS Med* 2013;10(2):e1001382. doi: 10.1371/journal.pmed.1001382  
32  
33 [published Online First: 2013/02/21]  
34  
35 31. Hall CS, Fottrell E, Wilkinson S, et al. Assessing the impact of mHealth interventions in low-  
36  
37 and middle-income countries--what has been shown to work? *Global health action*  
38  
39 2014;7:25606. doi: 10.3402/gha.v7.25606 [published Online First: 2014/11/02]  
40  
41  
42  
43  
44  
45  
46  
47  
48  
49  
50  
51  
52  
53  
54  
55  
56  
57  
58  
59  
60

1  
2  
3 **Figure 1.** ALRITE sample screenshots. A) Menu screen. B) Respiratory rate counter. C)  
4 Example of diagnosis and treatment recommendations. D) Educational toolkit pop-up on  
5 bronchodilator administration. E) Educational toolkit pop-up on stridor.  
6  
7  
8  
9

10  
11 **Figure 2.** Frontline health workers' perspectives of determinants of ALRITE implementation.  
12  
13  
14  
15  
16  
17  
18  
19  
20  
21  
22  
23  
24  
25  
26  
27  
28  
29  
30  
31  
32  
33  
34  
35  
36  
37  
38  
39  
40  
41  
42  
43  
44  
45  
46  
47  
48  
49  
50  
51  
52  
53  
54  
55  
56  
57  
58  
59  
60



Figure 1. ALRITE sample screenshots. A) Menu screen. B) Respiratory rate counter. C) Example of diagnosis and treatment recommendations. D) Educational toolkit pop-up on bronchodilator administration. E) Educational toolkit pop-up on stridor.

325x87mm (72 x 72 DPI)

1  
2  
3  
4  
5  
6  
7  
8  
9  
10  
11  
12  
13  
14  
15  
16  
17  
18  
19  
20  
21  
22  
23  
24  
25  
26  
27  
28  
29  
30  
31  
32  
33  
34  
35  
36  
37  
38  
39  
40  
41  
42  
43  
44  
45  
46  
47  
48  
49  
50  
51  
52  
53  
54  
55  
56  
57  
58  
59  
60

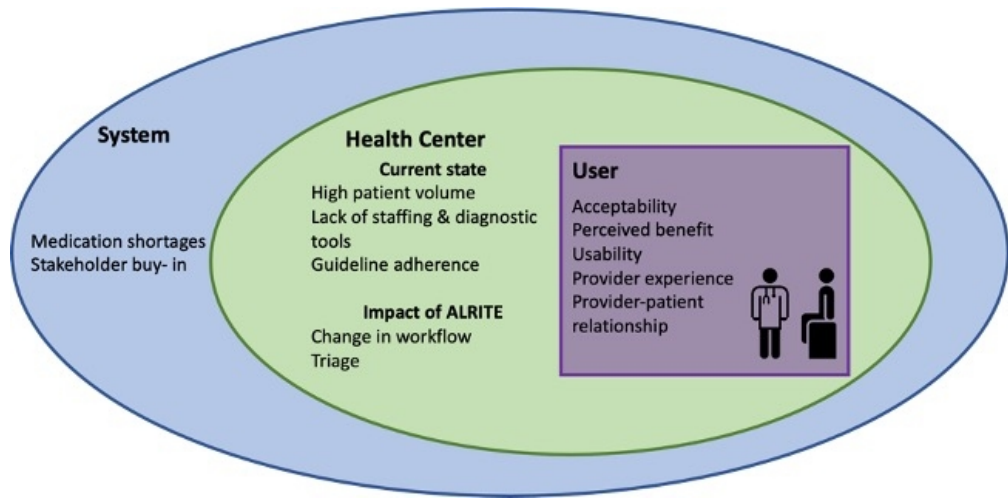

Figure 2. Frontline health workers' perspectives of determinants of ALRITE implementation.

228x112mm (72 x 72 DPI)

## In-depth Interviews: Facilitator's Guide

### I. Basic information

Tell me about your health center:

- how busy
- proportion of children you see vs adults
- common problems that children come with
- use of WHO IMCI routinely
- when thinking specifically about respiratory disease in children,
  - o what is the range of severity?
  - o Diagnostic tools available?
  - o Treatment?
  - o Diagnoses?
  - o Referral to hospital? Referrals to specialty care?
  - o How comfortable are providers in assessing and treating children?
  - o What kind of training do they receive? Is there any refresher training or CME?
  - o What are the biggest challenges at your health center in diagnosing and treating children with respiratory illness?
  - o how common do you think asthma/recurrent wheezing is in the young children that you see?
  - o Which asthma medicines do you commonly use in this health facility? Availability of asthma medications both in the clinic and to take home?

### II. Brief demonstration of ALRITE

This app is 27 Mb. Do you think providers would be willing/interested in downloading to their personal device?

*Start with brief demonstration, then give time to use the app.*

### III. General comments – ALRITE tool as mobile app (spend less time here)

- What did you like about the app?
- What did you think could be improved?
- How could this app help fill a need in your health center? What parts of the app could be the most helpful?
- Where do you see challenges with using the app?

### IV. Feasibility of ALRITE tool

1) Bronchodilator timing and reevaluation.

- Tell me about use of bronchodilators in this clinic. Are they often prescribed? How are they given (oral/inhaler/nebulizer)? How are they supplied to the clinic? How are they supplied to the patient?
- This tool requires reassessment if a bronchodilator is given to evaluate whether it was helpful or not. How is that different from current practice? Is reassessment usually done?
  - o What are barriers not to reassess?

2) Integration into clinical practice

- How can we avoid extra work that may be caused by using the app?



- 1 - Biggest challenges/barriers to use?
- 2 - What kind of training is required to use the app successfully?
- 3 - Interest in using stored information in the app as a form of electronic medical record?

11 **If there's time (and hasn't been addressed during the interview)...**

12 What is the supply chain like for bronchodilators and other medications? Are there some that are always  
13 reliably available vs others?

14 Limitations/challenges that you see regarding resource availability? If so, what specifically?

15 Challenges with diagnosis of asthma

- 16 - can patients access inhaled bronchodilator, spacers if they were helpful
- 17 - how often do you refer for specialty care; for what indications; level of respiratory support
- 18 - how common do you think asthma/recurrent wheezing is in the young children that you see
- 19 - Is there a stigma associated around the diagnosis of asthma?
- 20 - Availability of asthma medications both in the clinic and outpatient. Pharmacy – how often dispensed.

21 What supply is like in pharmacy. How often prescribed by clinicians?

- 22 - workflow of a patient from start to finish
- 23 - Limitations/challenges that you see regarding resource availability? If so, what specifically?

## Focus Group: Facilitator's Guide

### I. Brief demonstration of ALRITE (5 min)

This app is 27 Mb. Would you be willing/interested in downloading?

Outline for focus group

1. Information about your health center
2. Feedback on ALRITE app
3. Feasibility of using app within health setting

### II. Basic information

Please raise hand if:

- a. you own a mobile phone
- b. that mobile phone is a smart phone
- c. you regularly use applications on your phone (ex: Facebook, Whatsapp, games...)
- d. you have used a mobile health application
- e. you have completed the WHO IMCI training  
(count and record for each)

Ice breaking questions (choose 1 or 2)

- how often do you see kids compared to adults in your setting?
- What is the typical workflow of children coming into clinic with respiratory complaints? (*how patients move from arrival to discharge and treatment*)
- What are the most common diagnoses that you give to children who come to clinic with respiratory symptoms?
- what kind of equipment and treatments do you have to take care of children with respiratory disease?

### III. General comments – ALRITE tool as mobile app (25 min)

- What are your general thoughts about the app?
- What did you think could be improved?
- Is there anything that you would remove from the app? Or add?
- Would this be something you would prefer to have on your personal phone or keep on a hospital phone/tablet?
- How could this app help fill a need in your clinical setting?
- Where do you see challenges with using the app?

### IV. Feasibility of ALRITE tool (20 min)

3) Bronchodilator timing and reevaluation.

- Tell us about your experience treating children with inhaled bronchodilators.
- The ALRITE app asks to reassess children after receiving a bronchodilator after 10 minutes. If you give bronchodilators to children, do you typically reassess them afterwards? Tell more about it. What are the challenges to perform a reassessment?

4) Integration into clinical practice

- How do you think using this app would change your workload?

- 1 - Do you think this app will change the flow of patients that you described earlier? Please elaborate.  
2 - Biggest challenges/barriers to use?  
3

4 **V. IMCI decision tree & Respiratory assessment (if there is time)**

- 5 - How does this protocol/decision tree follow how you currently assess patients in your clinic?  
6 - Do you think the application impacts your ability to perform respiratory assessment? If so, how? If not,  
7 what would make it more useful?  
8  
9

10  
11 **Closing comments**  
12  
13  
14  
15  
16  
17  
18  
19  
20  
21  
22  
23  
24  
25  
26  
27  
28  
29  
30  
31  
32  
33  
34  
35  
36  
37  
38  
39  
40  
41  
42  
43  
44  
45  
46  
47  
48  
49  
50  
51  
52  
53  
54  
55  
56  
57  
58  
59  
60

For peer review only

# Introduction to ALRITE & Usability test

## Description of ALRITE

ALRITE is a mobile health application that was created to help diagnose and manage acute respiratory illnesses in young children. The goal of the app is to provide decision support to healthcare providers for children with acute respiratory complaints. The app contains a decision tree based on the World Health Organization's (WHO) Integrated Management of Childhood Illness (IMCI) case management guidelines.

One unique addition is that ALRITE will guide you through a respiratory assessment to help decide on whether a bronchodilator trial may be beneficial. Globally, wheezing illnesses are under-recognized and could contribute to severe respiratory illness in young children.

After the assessment, ALRITE will provide most likely diagnoses and treatment recommendations based on the information provided: 1) pneumonia, 2) pneumonia + wheezing illness, 3) severe disease requiring urgent referral/intervention, or 4) upper respiratory infection (supportive care only).

## Instructions to participant:

We will ask you to complete a series of tasks using simulated clinical scenarios. There is no time limit or one single solution to completing each task. The study is designed to test the app and not you. You are welcome to ask me any questions that you have while completing the task. There may be times in the study where I do not answer your question because we are interested in seeing how you solve the problem. I will let you know when I cannot answer your question.

As you complete these tasks, we are going to ask you to think aloud as you work. Thinking aloud will help provide us an idea of what you are thinking as you are completing the task. We understand that you may forget to think aloud. If this happens, we ask you to tell us what you are thinking about. After each task is completed, I will ask you a few questions about the task. After all tasks have been completed, I will ask you a few questions about your overall experience of the ALRITE mobile application. If any of the questions are unclear, please ask for clarification.

We ask that during the scenarios, you imagine that you are using the app in the middle of a busy clinical shift and answer the questions as such.

## Participant Comments & Feedback

Participant comments are verbal cues that indicate successes and failures in the app. We will record these comments digitally for later review as well as notetaking during the interview. Participants will be asked to answer a brief survey after completing the interview.

## Errors

Errors are mistakes that the participants make while using the app that slows or stops the participant from completing each task. This data is critical for fixing errors and increasing efficiency in the app. These errors will be documented by the notetaker.

## Scenario 1:

### **Task 1: Input information provided into the app to determine whether a bronchodilator trial is recommended.**

*A new patient enters your clinic with the following circumstances:*

- *Name: (choose your name)*
- *Female*
- *Birthdate (choose a date where the child is between 4-6 months old)*
- *Alert and playful*
- *Not Vomiting or convulsing*
- *No difficulty eating or drinking*
- *Coughing for 10 days*
- *No HIV exposure risk*
- *This is her third episode of coughing/difficulty breathing episode since birth.*
- *On exam, her temperature is 37.3C. Oxygen saturation 94%. Respiratory rate 64. She has moderate chest indrawing. No Stridor. When you listen with a stethoscope, you hear wheezing when she inhales and exhales.*

**Task 2: Read aloud whether a bronchodilator trial is recommended. If recommended, please find the tutorial on how to administer the bronchodilator and talk through how to administer to your patient. Input that you have administered the bronchodilator in the app.**

## Scenario 2:

### **Task 3: Input information for the respiratory assessment using the video of a child provided.**

*A new patient enters your clinic with the following circumstances:*

- *Name: (choose a friend's name)*
- *Male*
- *Birthdate (choose a date where the child is 3 years old)*
- *Alert and playful*
- *Not Vomiting or convulsing*
- *No difficulty eating or drinking*
- *Coughing for 7 days*
- *No HIV exposure risk*
- *This is his second episode of coughing/difficulty breathing episode since birth*

*Watch video and record respiratory assessment*

**Task 4: Read aloud whether a bronchodilator trial is recommended. Then close the encounter and return to the home screen.**

## Scenario 3:

1 **Task 5: Return to your first patient's encounter (Scenario 1). Is she ready for re-assessment? How do you**  
2 **know?**

3 **If ready, please input her follow up examination outlined below.**

- 4 • *Name: (your name)*
- 5 • *After the bronchodilator, she seems to be breathing a little easier than before the trial. On exam, her oxygen*  
6 *saturation 95%. Respiratory rate 54. She has mild chest indrawing. She still has wheezing but only when she*  
7 *exhales.*

8 **Task 6: Talk through the diagnosis and treatment recommendations provided by the app.**  
9  
10  
11  
12  
13  
14  
15  
16  
17  
18  
19  
20  
21  
22  
23  
24  
25  
26  
27  
28  
29  
30  
31  
32  
33  
34  
35  
36  
37  
38  
39  
40  
41  
42  
43  
44  
45  
46  
47  
48  
49  
50  
51  
52  
53  
54  
55  
56  
57  
58  
59  
60

# Reporting checklist for qualitative study.

Based on the SRQR guidelines.

|                                            | Reporting Item                                                                                                                                                                                                                                                                                                                                                                                                                                                                                                                                             | Page Number |
|--------------------------------------------|------------------------------------------------------------------------------------------------------------------------------------------------------------------------------------------------------------------------------------------------------------------------------------------------------------------------------------------------------------------------------------------------------------------------------------------------------------------------------------------------------------------------------------------------------------|-------------|
| <b>Title</b>                               |                                                                                                                                                                                                                                                                                                                                                                                                                                                                                                                                                            |             |
|                                            | <a href="#">#1</a> Concise description of the nature and topic of the study identifying the study as qualitative or indicating the approach (e.g. ethnography, grounded theory) or data collection methods (e.g. interview, focus group) is recommended                                                                                                                                                                                                                                                                                                    | 1           |
| <b>Abstract</b>                            |                                                                                                                                                                                                                                                                                                                                                                                                                                                                                                                                                            |             |
|                                            | <a href="#">#2</a> Summary of the key elements of the study using the abstract format of the intended publication; typically includes background, purpose, methods, results and conclusions                                                                                                                                                                                                                                                                                                                                                                | 2           |
| <b>Introduction</b>                        |                                                                                                                                                                                                                                                                                                                                                                                                                                                                                                                                                            |             |
| Problem formulation                        | <a href="#">#3</a> Description and significance of the problem / phenomenon studied: review of relevant theory and empirical work; problem statement                                                                                                                                                                                                                                                                                                                                                                                                       | 4-5         |
| Purpose or research question               | <a href="#">#4</a> Purpose of the study and specific objectives or questions                                                                                                                                                                                                                                                                                                                                                                                                                                                                               | 5           |
| <b>Methods</b>                             |                                                                                                                                                                                                                                                                                                                                                                                                                                                                                                                                                            |             |
| Qualitative approach and research paradigm | <a href="#">#5</a> Qualitative approach (e.g. ethnography, grounded theory, case study, phenomenology, narrative research) and guiding theory if appropriate; identifying the research paradigm (e.g. postpositivist, constructivist / interpretivist) is also recommended; rationale. The rationale should briefly discuss the justification for choosing that theory, approach, method or technique rather than other options available; the assumptions and limitations implicit in those choices and how those choices influence study conclusions and | 8           |

transferability. As appropriate the rationale for several items might be discussed together.

|    |                              |                     |            |
|----|------------------------------|---------------------|------------|
| 1  |                              |                     |            |
| 2  |                              |                     |            |
| 3  |                              |                     |            |
| 4  | Researcher characteristics   | <a href="#">#6</a>  | 7-8        |
| 5  | and reflexivity              |                     |            |
| 6  |                              |                     |            |
| 7  |                              |                     |            |
| 8  |                              |                     |            |
| 9  |                              |                     |            |
| 10 |                              |                     |            |
| 11 |                              |                     |            |
| 12 |                              |                     |            |
| 13 |                              |                     |            |
| 14 | Context                      | <a href="#">#7</a>  | 5-6        |
| 15 |                              |                     |            |
| 16 | Sampling strategy            | <a href="#">#8</a>  | 6,8        |
| 17 |                              |                     |            |
| 18 |                              |                     |            |
| 19 |                              |                     |            |
| 20 |                              |                     |            |
| 21 | Ethical issues pertaining to | <a href="#">#9</a>  | 9          |
| 22 | human subjects               |                     |            |
| 23 |                              |                     |            |
| 24 |                              |                     |            |
| 25 |                              |                     |            |
| 26 |                              |                     |            |
| 27 | Data collection methods      | <a href="#">#10</a> | 7-9        |
| 28 |                              |                     |            |
| 29 |                              |                     |            |
| 30 |                              |                     |            |
| 31 |                              |                     |            |
| 32 |                              |                     |            |
| 33 |                              |                     |            |
| 34 |                              |                     |            |
| 35 | Data collection              | <a href="#">#11</a> | 7,         |
| 36 | instruments and              |                     | supplement |
| 37 | technologies                 |                     |            |
| 38 |                              |                     |            |
| 39 |                              |                     |            |
| 40 |                              |                     |            |
| 41 |                              |                     |            |
| 42 | Units of study               | <a href="#">#12</a> | 9          |
| 43 |                              |                     |            |
| 44 |                              |                     |            |
| 45 |                              |                     |            |
| 46 |                              |                     |            |
| 47 | Data processing              | <a href="#">#13</a> | 7          |
| 48 |                              |                     |            |
| 49 |                              |                     |            |
| 50 |                              |                     |            |
| 51 |                              |                     |            |
| 52 |                              |                     |            |
| 53 |                              |                     |            |
| 54 | Data analysis                | <a href="#">#14</a> | 8          |
| 55 |                              |                     |            |
| 56 |                              |                     |            |
| 57 |                              |                     |            |
| 58 |                              |                     |            |
| 59 |                              |                     |            |
| 60 |                              |                     |            |



|    |                              |                     |                                                                 |       |
|----|------------------------------|---------------------|-----------------------------------------------------------------|-------|
| 1  | Techniques to enhance        | <a href="#">#15</a> | Techniques to enhance trustworthiness and credibility of        | 8     |
| 2  | trustworthiness              |                     | data analysis (e.g. member checking, audit trail,               |       |
| 3  |                              |                     | triangulation); rationale                                       |       |
| 4  |                              |                     |                                                                 |       |
| 5  |                              |                     |                                                                 |       |
| 6  | <b>Results/findings</b>      |                     |                                                                 |       |
| 7  |                              |                     |                                                                 |       |
| 8  |                              |                     |                                                                 |       |
| 9  | Syntheses and                | <a href="#">#16</a> | Main findings (e.g. interpretations, inferences, and themes);   | 9-19  |
| 10 | interpretation               |                     | might include development of a theory or model, or              |       |
| 11 |                              |                     | integration with prior research or theory                       |       |
| 12 |                              |                     |                                                                 |       |
| 13 |                              |                     |                                                                 |       |
| 14 | Links to empirical data      | <a href="#">#17</a> | Evidence (e.g. quotes, field notes, text excerpts,              | 10-19 |
| 15 |                              |                     | photographs) to substantiate analytic findings                  |       |
| 16 |                              |                     |                                                                 |       |
| 17 |                              |                     |                                                                 |       |
| 18 | <b>Discussion</b>            |                     |                                                                 |       |
| 19 |                              |                     |                                                                 |       |
| 20 | Intergration with prior      | <a href="#">#18</a> | Short summary of main findings; explanation of how              | 20-22 |
| 21 | work, implications,          |                     | findings and conclusions connect to, support, elaborate on,     |       |
| 22 | transferability and          |                     | or challenge conclusions of earlier scholarship; discussion     |       |
| 23 | contribution(s) to the field |                     | of scope of application / generalizability; identification of   |       |
| 24 |                              |                     | unique contributions(s) to scholarship in a discipline or field |       |
| 25 |                              |                     |                                                                 |       |
| 26 |                              |                     |                                                                 |       |
| 27 |                              |                     |                                                                 |       |
| 28 | Limitations                  | <a href="#">#19</a> | Trustworthiness and limitations of findings                     | 22    |
| 29 |                              |                     |                                                                 |       |
| 30 |                              |                     |                                                                 |       |
| 31 | <b>Other</b>                 |                     |                                                                 |       |
| 32 |                              |                     |                                                                 |       |
| 33 | Conflicts of interest        | <a href="#">#20</a> | Potential sources of influence of perceived influence on        | 24    |
| 34 |                              |                     | study conduct and conclusions; how these were managed           |       |
| 35 |                              |                     |                                                                 |       |
| 36 |                              |                     |                                                                 |       |
| 37 | Funding                      | <a href="#">#21</a> | Sources of funding and other support; role of funders in data   | 24    |
| 38 |                              |                     | collection, interpretation and reporting                        |       |
| 39 |                              |                     |                                                                 |       |

None The SRQR checklist is distributed with permission of Wolters Kluwer © 2014 by the Association of American Medical Colleges. This checklist can be completed online using <https://www.goodreports.org/>, a tool made by the [EQUATOR Network](#) in collaboration with [Penelope.ai](#)

# BMJ Open

## Health workers' perspectives of a mobile health tool to improve diagnosis and management of pediatric acute respiratory illnesses in Uganda: A qualitative study

|                                 |                                                                                                                                                                                                                                                                                                                                                                                                                                                                                                                                                                                                                                                                                                                                                                                                                                                                                                                                                                                                                                                                                                   |
|---------------------------------|---------------------------------------------------------------------------------------------------------------------------------------------------------------------------------------------------------------------------------------------------------------------------------------------------------------------------------------------------------------------------------------------------------------------------------------------------------------------------------------------------------------------------------------------------------------------------------------------------------------------------------------------------------------------------------------------------------------------------------------------------------------------------------------------------------------------------------------------------------------------------------------------------------------------------------------------------------------------------------------------------------------------------------------------------------------------------------------------------|
| Journal:                        | <i>BMJ Open</i>                                                                                                                                                                                                                                                                                                                                                                                                                                                                                                                                                                                                                                                                                                                                                                                                                                                                                                                                                                                                                                                                                   |
| Manuscript ID                   | bmjopen-2021-049708.R2                                                                                                                                                                                                                                                                                                                                                                                                                                                                                                                                                                                                                                                                                                                                                                                                                                                                                                                                                                                                                                                                            |
| Article Type:                   | Original research                                                                                                                                                                                                                                                                                                                                                                                                                                                                                                                                                                                                                                                                                                                                                                                                                                                                                                                                                                                                                                                                                 |
| Date Submitted by the Author:   | 27-Jun-2021                                                                                                                                                                                                                                                                                                                                                                                                                                                                                                                                                                                                                                                                                                                                                                                                                                                                                                                                                                                                                                                                                       |
| Complete List of Authors:       | Ellington, Laura; University of Washington School of Medicine, Pediatrics<br>Najjingo, Irene; Makerere University College of Health Sciences,<br>Makerere University Lung Institute<br>Rosenfeld, Margaret; University of Washington School of Medicine,<br>Pediatrics; University of Washington School of Public Health<br>Stout, James ; University of Washington School of Medicine, Pediatrics;<br>University of Washington School of Public Health<br>Farquhar, Stephanie ; University of Washington School of Public Health<br>Vashistha, Aditya; Cornell University, Computer Science<br>Nekesa, Bridget; Makerere University College of Health Sciences,<br>Makerere University Lung Institute<br>Namiya, Zaituni; Makerere University College of Health Sciences,<br>Makerere University Lung Institute<br>Kruse, Agatha ; University of Washington, Computer Science and<br>Engineering<br>Anderson, Richard; University of Washington, Computer Science and<br>Engineering<br>Nantanda, Rebecca; Makerere University College of Health Sciences,<br>Makerere University Lung Institute |
| <b>Primary Subject Heading</b>: | Global health                                                                                                                                                                                                                                                                                                                                                                                                                                                                                                                                                                                                                                                                                                                                                                                                                                                                                                                                                                                                                                                                                     |
| Secondary Subject Heading:      | Paediatrics, Qualitative research, Respiratory medicine, Public health, Infectious diseases                                                                                                                                                                                                                                                                                                                                                                                                                                                                                                                                                                                                                                                                                                                                                                                                                                                                                                                                                                                                       |
| Keywords:                       | Respiratory infections < THORACIC MEDICINE, International health services < HEALTH SERVICES ADMINISTRATION & MANAGEMENT, Community child health < PAEDIATRICS, Paediatric thoracic medicine < PAEDIATRICS, PUBLIC HEALTH, QUALITATIVE RESEARCH                                                                                                                                                                                                                                                                                                                                                                                                                                                                                                                                                                                                                                                                                                                                                                                                                                                    |
|                                 |                                                                                                                                                                                                                                                                                                                                                                                                                                                                                                                                                                                                                                                                                                                                                                                                                                                                                                                                                                                                                                                                                                   |

SCHOLARONE™  
Manuscripts



I, the Submitting Author has the right to grant and does grant on behalf of all authors of the Work (as defined in the below author licence), an exclusive licence and/or a non-exclusive licence for contributions from authors who are: i) UK Crown employees; ii) where BMJ has agreed a CC-BY licence shall apply, and/or iii) in accordance with the terms applicable for US Federal Government officers or employees acting as part of their official duties; on a worldwide, perpetual, irrevocable, royalty-free basis to BMJ Publishing Group Ltd ("BMJ") its licensees and where the relevant Journal is co-owned by BMJ to the co-owners of the Journal, to publish the Work in this journal and any other BMJ products and to exploit all rights, as set out in our [licence](#).

The Submitting Author accepts and understands that any supply made under these terms is made by BMJ to the Submitting Author unless you are acting as an employee on behalf of your employer or a postgraduate student of an affiliated institution which is paying any applicable article publishing charge ("APC") for Open Access articles. Where the Submitting Author wishes to make the Work available on an Open Access basis (and intends to pay the relevant APC), the terms of reuse of such Open Access shall be governed by a Creative Commons licence – details of these licences and which [Creative Commons](#) licence will apply to this Work are set out in our licence referred to above.

Other than as permitted in any relevant BMJ Author's Self Archiving Policies, I confirm this Work has not been accepted for publication elsewhere, is not being considered for publication elsewhere and does not duplicate material already published. I confirm all authors consent to publication of this Work and authorise the granting of this licence.

1  
2  
3  
4  
5  
6  
7  
8  
9  
10  
11 **Health workers' perspectives of a mobile health tool to improve diagnosis and**  
12 **management of pediatric acute respiratory illnesses in Uganda: A qualitative study**  
13  
14  
15  
16  
17  
18  
19

20 Laura E Ellington, MD MS<sup>1\*</sup>; Irene Najjingo<sup>2</sup>; Margaret Rosenfeld, MD MPH<sup>1,3</sup>; James W Stout,  
21 MD MPH<sup>1,3</sup>; Stephanie A Farquhar, PhD<sup>3</sup>; Aditya Vashistha, PhD MS<sup>4</sup>; Bridget Nekesa<sup>2</sup>; Zaituni  
22 Namiya<sup>2</sup>; Agatha J Kruse<sup>5</sup>; Richard Anderson, PhD<sup>5</sup>; Rebecca Nantanda, MBChB, PhD<sup>2</sup>  
23  
24  
25

26 <sup>1</sup> Department of Pediatrics, University of Washington School of Medicine, Seattle, Washington,  
27  
28 USA  
29

30 <sup>2</sup> Makerere University Lung Institute, Makerere University College of Health Sciences, Kampala,  
31  
32 Uganda  
33

34 <sup>3</sup> University of Washington School of Public Health, Seattle, Washington, USA  
35

36 <sup>4</sup> Cornell University School of Computer Science, Ithaca, NY, USA  
37

38 <sup>5</sup> University of Washington School of Computer Science and Engineering, Seattle, Washington,  
39  
40 USA  
41  
42  
43  
44

45 \*Corresponding author: Laura E. Ellington, 4800 Sand Point Way NE, Seattle, WA 98105;

46 [lelling@uw.edu](mailto:lelling@uw.edu)  
47  
48  
49  
50  
51  
52  
53

54 **Word count: 5831**  
55  
56  
57  
58  
59  
60

## Abstract

Objectives: Mobile health tools have potential to improve the diagnosis and management of acute lower respiratory illnesses (ALRI), a leading cause of pediatric mortality worldwide. The objectives were to evaluate health workers' perceptions of acceptability, usability, and feasibility of ALRITE, a novel mobile health tool to help frontline health workers diagnose, treat and provide education about ALRI in children <5 years.

Design: A qualitative study including semi-structured interviews with health facility administrators and focus groups with primary care health workers.

Setting: Two federally funded Ugandan primary care health facilities, one peri-urban and one rural.

Participants: We enrolled 3 health administrators and 28 health workers (clinical officers and nurses).

Intervention: The ALRITE smartphone application was developed to help frontline health workers adhere to ALRI guidelines and differentiate wheezing illnesses from pneumonia in children under 5 years of age. ALRITE contains a simple decision tree, a partially automated respiratory rate counter, educational videos, and an adapted respiratory assessment score to determine bronchodilator responsiveness. We performed a demonstration of ALRITE for participants at the beginning of interviews and focus groups. No participant had used ALRITE prior.

Results: Themes impacting the potential implementation of ALRITE were organized using individual-level, clinic-level, and health-system level determinants. Individual-level determinants were acceptability and perceived benefit, usability, provider needs, and provider-patient relationship. Clinic-level determinants were limited resources and integration within the health center. Systems-level determinants included medication shortages and stakeholder engagement.

1  
2  
3 Conclusions: Incorporation of these themes will ready ALRITE for field testing. Early  
4  
5 engagement of end-users provides insights critical to the development of tailored mHealth  
6  
7 decision support tools.  
8  
9  
10  
11  
12  
13  
14  
15  
16  
17  
18  
19  
20  
21  
22  
23  
24  
25  
26  
27  
28  
29  
30  
31  
32  
33  
34  
35  
36  
37  
38  
39  
40  
41  
42  
43  
44  
45  
46  
47  
48  
49  
50  
51  
52  
53  
54  
55  
56  
57  
58  
59  
60

For peer review only

### Strengths and limitations of this study

- By using a technology probe and human-centered participatory approach early in mHealth development, we engaged participants and gathered information not only about the ALRITE tool but also contextual factors that are pivotal to the ultimate success of a mHealth application in this setting
- We partnered with local health officials in the planning phase to encourage health worker attendance to information sessions, which translated to enrolling almost all eligible health workers, thus providing a more accurate and complete assessment at each study site
- This study was limited by perspectives at two health centers, which may not reflect regional differences in resource availability, staffing, and health workers' perceptions.
- Health worker perceptions were obtained without experience using ALRITE in clinical practice, which will be a focus of future work.
- We acknowledge that key team members who participated in all aspects of this project are American physicians/researchers who bring a different set of experiences and lens to this work, which may have influenced participants' responses and interpretation, but American team members worked in close partnership with Ugandan team members to ensure shared decision-making and engagement with study participants.

**Keywords:** Community child Health, international health services, paediatric thoracic medicine, respiratory infections, qualitative research, public health, mobile health

## INTRODUCTION

Acute lower respiratory illnesses (ALRI) remain a leading cause of mortality in children under 5, responsible for 15% of all deaths in this age range.<sup>1,2</sup> Over 800,000 young children worldwide die of ALRI each year; 500,000 of these deaths occur in sub-Saharan Africa.<sup>1-5</sup> In Uganda, ALRI is responsible for 11% deaths in children under 5.<sup>5,6</sup> ALRI encompass multiple disease processes that include bacterial pneumonia, viral pneumonia, and wheezing illnesses. Differentiating between these diseases and choosing the appropriate treatment plan is challenging, especially where skilled personnel and diagnostic tools are lacking. The World Health Organization (WHO) Integrated Management of Childhood Illnesses (IMCI) provides guidelines for ALRI diagnosis and management, with emphasis on pneumonia and treatment with antibiotics. The IMCI was updated in 2014 to include assessment of wheezing and treatment with inhaled bronchodilators,<sup>7</sup> but wheezing illness remains underdiagnosed and undertreated in low- and middle-income countries (LMICs).<sup>8,9</sup>

Mobile phone use recently surpassed two-thirds of the global population and over 70% in Uganda<sup>10</sup>, offering opportunities for digital health tools to enhance adherence to guidelines and build capacity through clinician education.<sup>11-16</sup> Importantly, small pilot studies of mHealth tools based on WHO IMCI ALRI guidelines demonstrated promising preliminary results but have not addressed wheezing illness.<sup>17-20</sup> To promote responsible, sustainable, and high impact mHealth interventions in LMICs, the WHO recently released digital health guidelines recommending high quality research in fields of decision support and education.<sup>21</sup>

We developed the Acute Lower Respiratory Illness Treatment and Evaluation (ALRITE) mHealth application as a decision support tool to aid frontline health workers to improve diagnosis and treatment of ALRI in children under 5 years of age, with a particular focus on distinguishing wheezing illness from pneumonia. In order to address potential challenges with



1  
2  
3 widespread ALRITE use, this study sought to understand determinants of successful ALRITE  
4 implementation from the end users' perspective. The objective of this study was to evaluate  
5 health workers' perceptions of feasibility, usability, and acceptability of the ALRITE mHealth tool  
6 in two Ugandan primary care health centers. This user-centered, formative approach will inform  
7 further development of a locally relevant decision support tool to improve the diagnosis and  
8 treatment of ALRI in Ugandan health centers.  
9  
10  
11  
12  
13  
14  
15  
16  
17

## 18 **METHODS**

### 19 **Study design**

20  
21 This study uses a human-centered, or participatory, approach to examine frontline health  
22 workers' perceptions of ALRITE and its impact on their workflows and patient care. We  
23 developed an initial prototype of ALRITE and used it as a technology probe to gather insights  
24 about its feasibility, usability, and acceptability. Technology probes are defined as instruments  
25 to "[collect] information about the use and users of the technology in a real-world setting",  
26 improve the intervention's design by meeting the needs and wishes of the user, and field-test.<sup>22</sup>  
27 We used an exploratory qualitative study design to allow for deeper exploration into feasibility,  
28 usability, and acceptability for the purposes of 1) improving the mHealth tool, 2) identifying  
29 barriers/facilitators beyond the tool itself to inform feasibility and implementation strategies, and  
30 3) determining quantitative outcomes measures for future studies (qual to QUAN mixed  
31 methods approach).<sup>23</sup> The research team determined that quantitative survey data would have  
32 been inadequate to answer our research questions due to lack of depth, opportunity to probe,  
33 and concerns about social desirability bias.  
34  
35  
36  
37  
38  
39  
40  
41  
42  
43  
44  
45  
46  
47  
48  
49  
50

51 We conducted in-depth semi-structured interviews with health facility administrators to  
52 understand clinic context, availability of resources, challenges, day-to-day operations, and  
53 feasibility of ALRITE from a systems standpoint (Supplementary Material). We conducted focus  
54  
55  
56  
57  
58  
59  
60

1  
2  
3 groups with primary care health workers (clinical officers and nurses) to understand how  
4 participants respond to peer responses and the forces that may influence their thinking and  
5 behavior around the app, how this would affect patient-provider interactions, and their reactions  
6 towards technology. All health worker participants had time to practice using ALRITE with  
7 clinical scenarios (Supplementary Material) before focus groups to give participants a better  
8 understanding of the app, its content, and usability to better inform their focus group responses.  
9  
10  
11  
12  
13  
14  
15  
16  
17

### 18 **Study sites**

19 Both study sites were federally funded Health Center IV in Jinja district, Uganda and offer free  
20 healthcare. The peri-urban site is located 15 minutes driving from the city center of Jinja, the  
21 second largest city in Uganda, and the rural site is located 45-60 minutes driving from Jinja.  
22 Both sites have inpatient and outpatient facilities and an operating theater for obstetrics and  
23 urgent surgical cases.  
24  
25  
26  
27  
28  
29  
30  
31

32 The health care delivery system in Uganda has 6 levels that build on the previous level: 1)  
33 Health Center II provides basic outpatient care; 2) Health Center III has maternity services; 3)  
34 Health Center IV has primary care, basic inpatient facilities and emergency obstetric care; 4)  
35 District Hospitals have general surgery, dental services, and diagnostic services (i.e. chest  
36 radiography and laboratory); 5) Regional Referral Hospitals have specialized care; 6) National  
37 Referral Hospital has additional specialized and sub-specialized services.  
38  
39  
40  
41  
42  
43  
44  
45  
46

47 The two specific Health Center IV were selected for this study based on prior research  
48 indicating that 1) adherence to IMCI was low, 2) consultations were performed by health  
49 workers with limited training, 3) antibiotics were over-prescribed, and 4) inhaled bronchodilators  
50 for wheezing illness were not prescribed.<sup>9</sup>  
51  
52  
53  
54  
55  
56  
57  
58  
59  
60

## Participants

We recruited at least 1 health administrator for semi-structured interviews from each study site. Health administrators were clinicians (medical doctors or clinical officers) who serve a director role in leadership and staff supervision at an individual health center, termed locally as “health facility in-charges”. Eligible participants for focus groups were health workers (clinical officers or nurses) who had been working at the study site for at least 6 months and were responsible for outpatient care of children. None had used ALRITE prior. Clinical officers complete a three-year diploma course in clinical medicine. Nurses in these health centers primarily act as clinicians due to staff shortages and task shifting. Prior to data collection, research team members met with officials at the Jinja District Health Office for approval, plan for disseminating study information to participating study sites, and scheduling days for recruitment and data collection. Information sessions were coordinated with help from health administrators at each study site to maximize participation. All health workers were notified about the session dates one week in advance and were invited to attend the information session even if not scheduled to work that day. The study team employed in-person information sessions for recruitment using convenience sampling. Sample size was determined by the number of health workers who showed up the scheduled days of data collection with the goal of recruiting all eligible health workers at each study site. All participants provided a written informed consent in English for their participation.

## ALRITE mHealth tool

Based on a previous mHealth tool, mPneumonia<sup>17 18</sup>, the ALRITE mHealth application was developed for smartphones to help frontline health workers adhere to IMCI guidelines and differentiate wheezing illnesses from pneumonia in children under 5 years of age. ALRITE contains a simple decision tree, a partially automated respiratory rate counter, educational videos (brief clips providing examples of children in respiratory distress, taken from WHO IMCI

1  
2  
3 training videos with permission), and an adapted respiratory assessment score to determine  
4 bronchodilator responsiveness (Figure 1). The algorithm walks the user through basic  
5 demographics, IMCI danger signs, medical history, physical exam, and bronchodilator  
6 assessment (if appropriate). The final diagnoses include *severe pneumonia or very severe*  
7 *disease, pneumonia +/-, wheezing illness, and cough or cold +/- wheezing illness*. The WHO  
8 classification does not include a separate diagnosis of “wheezing illness” but rather includes the  
9 diagnosis and treatment of wheezing as additional recommendations for the diagnoses of  
10 “pneumonia” and “cough or cold”.<sup>7</sup> We added the term “wheezing illness” to ALRITE diagnoses  
11 to prompt health workers to provide bronchodilators and refer for further assessment as  
12 necessary. The app is 27 MB and was downloaded on supplied Android smartphones for study  
13 use.

### 24 25 26 27 28 **Data collection and management**

29  
30 Prior to data collection, research assistants were trained and pretested focus group/interview  
31 guides through simulations with the research team. Demographic information was collected first  
32 on paper forms, then transferred to REDCap (Research Electronic Data Capture).<sup>24</sup> Unique  
33 identifiers were used for each participant. Focus groups and interviews were performed  
34 primarily in English over the course of one week using interview/focus group guides  
35 (Supplementary information). Prior to focus groups, all health worker participants were given  
36 time to practice using ALRITE by going through at least 2 clinical scenarios individually or in  
37 small groups of up to 3 people (Supplementary information), while members of the study team  
38 (LEE, IN, MR, SAF, BN, ZN) asked for specific feedback, answered questions about the app,  
39 and took notes. We performed a demonstration of ALRITE for participants at the beginning of  
40 interviews and focus groups. Ugandan research assistants did provide clarifications and some  
41 probing in the local language; some participant responses were given in the local language and  
42 translated to English for the study notes. All interviews and focus groups were digitally recorded,  
43  
44  
45  
46  
47  
48  
49  
50  
51  
52  
53  
54  
55  
56  
57  
58  
59  
60

1  
2  
3 deidentified, and transcribed into English without identifiers by IN, who is fluent in English and  
4 the local language. Transcriptions were reviewed by IN and LEE for content and cultural  
5 accuracy. Members of the study team (LEE, IN, MR, SAF) took notes during focus groups and  
6 interviews to augment and clarify the transcribed notes. Hard copy data were securely  
7 transported to Makerere University Lung Institute (Kampala, Uganda) for secure storage. No  
8 personal data will be transferred from the primary institution in Kampala, Uganda.  
9  
10  
11  
12  
13  
14  
15

### 16 17 18 **Study team**

19  
20 This was an international collaboration, including experts in public health, pulmonology/asthma,  
21 information and communication technology for development, human-computer interaction, and  
22 community-based interventions. Research assistants BN and ZN from Uganda experienced in  
23 qualitative interviewing and fluent in the local language led focus groups and interviews with the  
24 guidance of LEE, a content expert in the ALRITE app with previous qualitative experience in  
25 technology implementation. SAF provided qualitative expertise in design, data collection, and  
26 analysis. RN provided local expertise in health systems, qualitative design and interview guides,  
27 and pediatrics. IN provided local research coordination and knowledge of the health system.  
28 Pediatric expertise was provided by RN and JS with additional pediatric pulmonology expertise  
29 by MR and LEE. RA was instrumental in the design of mPneumonia and senior author on both  
30 manuscripts.<sup>17 18</sup> ALRITE app design and development was performed by AK, AV, and RA, with  
31 additional expertise in usability testing and human-centered design by AV. We acknowledge  
32 that key team members who participated in all aspects of this project are American physicians  
33 and researchers who bring a different set of experiences and lens to this work, and that our  
34 positionality may have influenced participants' responses and interpretation. Working in  
35 partnership with our Ugandan team was critical to ensure shared decision-making and our  
36 ability to work closely with the clinicians.  
37  
38  
39  
40  
41  
42  
43  
44  
45  
46  
47  
48  
49  
50  
51  
52  
53  
54  
55  
56  
57  
58  
59  
60

## Analysis

We analyzed our detailed notes and transcripts using a deductive thematic approach, whereby the researchers LEE, SAF, and IN examined the data to identify common themes for each of the research questions based on a similar framework of a previously published mHealth technology.<sup>17 18</sup> During the analysis, the team documented outlier or dissenting perspectives in order to provide a more complete picture of participant responses to ALRITE. First, LEE and SAF read through each of the transcripts and set of notes and then we developed a provisional framework based on primary research questions. LEE, SAF, MR, IN, BN, and ZN held team meetings following each day of data collection to compile notes, review emerging themes, and refine the coding framework. Codes were aggregated into major themes and subthemes by first annotating an online document of transcripts, then reorganizing into a separate document, similar to but without the use of coding software. Additional meetings with the research team allowed for further refinement of themes and subthemes. Transcripts were reread to ensure that preliminary results represented the majority of user feedback. The quotes were chosen to confirm and highlight themes and introduce diverging viewpoints not previously captured. The Standards for Reporting Qualitative Research (SRQR) were used to guide reporting.<sup>25</sup>

## Ethics

The study was approved by the Mulago Hospital Research and Ethics Committee and Uganda National Council for Science and Technology (HS2692). The study was reviewed and received exempt status from the University of Washington (STUDY0007895). Written informed consent was obtained from all participants in accordance with international and local regulations.

## Patient and Public involvement

While not involved in the initial design, conduct, or reporting, study participants are involved in ultimate design and implementation of the intervention and are included in the dissemination plan, along with district- and national-level health system members and patient caregivers.

## RESULTS

### Participant & setting characteristics

In January 2020, we enrolled 28 healthcare provider participants across 2 health centers in Uganda. Key stakeholders, including 3 health administrators (HA), took part in individual in-depth interviews, while 5 clinical officers and 20 nurses (HW) took part in 3 focus groups (Table 1). Based on recommendations from the health administrators from each site, we conducted separate focus groups for clinical officers (n=3) and nurses (n=10) at the peri-urban site to limit concerns around potential unequal power dynamics, but this was not deemed a concern at the rural site where one focus group was recommended. Interviews were approximately 30 minutes long, while focus groups were approximately 1.5 hours in length.

**Table 1. Participant characteristics**

|                                         | Rural Site  | Peri-urban Site |
|-----------------------------------------|-------------|-----------------|
| <b><i>In-depth interviews</i></b>       | <b>n=1</b>  | <b>n=2</b>      |
| <b>Role</b>                             |             |                 |
| Medical officer                         | 0           | 2               |
| Clinical officer                        | 1           | 0               |
| <b>Male</b>                             | 1           | 2               |
| <b><i>Focus groups</i></b>              | <b>n=12</b> | <b>n=13</b>     |
| <b>Role</b>                             |             |                 |
| Clinical officer                        | 2           | 3               |
| Nurse                                   | 10          | 10              |
| <b>Female</b>                           | 9           | 10              |
| <b>Age</b>                              |             |                 |
| <30 years                               | 5           | 5               |
| 30-40 years                             | 5           | 6               |
| >40 years                               | 2           | 2               |
| <b>Experience in health care, years</b> |             |                 |
| < 5                                     | 2           | 3               |
| 5-10                                    | 8           | 4               |
| > 10                                    | 2           | 6               |

1  
2  
3  
4  
5 We identified several themes impacting the development and implementation of ALRITE in  
6  
7 Ugandan health centers from the perspective of health administrators and frontline health  
8  
9 workers. Themes were organized by a social ecological model of determinants: individual, clinic,  
10  
11 and health system (Figure 2). Individual-level determinants were acceptability and perceived  
12  
13 benefit, usability, provider needs, and provider-patient relationship. Clinic-level determinants  
14  
15 were limited resources, integration within the health center. Systems-level determinants  
16  
17 included medication shortages and stakeholder engagement. Each theme is presented below in  
18  
19 greater detail and with direct quotes that typify respondent comments.  
20  
21  
22  
23

#### 24 **Individual-level**

##### 25 Acceptability & perceived benefit of ALRITE

26  
27 All health workers indicated they would like to have ALRITE available to use in their healthcare  
28  
29 setting. Health workers also reported that they appreciated that ALRITE reminded them of  
30  
31 important medical questions to ask and key components of the physical exam.  
32  
33  
34  
35  
36

37 “It helps us to remember the clear assessment of these children because at times  
38  
39 you are rushing and forget to assess something. You go with what you see quickly,  
40  
41 but the app gives you the procedure to follow. It also helps in giving the right doses.”  
42

43 HW-002-FG2  
44  
45  
46

47 They responded positively to the integrated respiratory rate counter. Health workers’ eagerness  
48  
49 to learn was apparent during focus groups and interviews. Indeed, many health workers  
50  
51 reported the educational videos were one of their favorite features of ALRITE. In addition to data  
52  
53 gathering, health workers liked the information management capabilities, including medication  
54  
55 dosing, which is generally age- or weight-based for children.  
56  
57  
58  
59  
60



1  
2  
3  
4  
5 “The part of the app that I like mainly are the videos. It is good because it helps  
6 diagnosing and guides through the right treatment hence saving patient time.” HA-  
7  
8  
9 001  
10

11  
12  
13 “[The respiratory rate counter] is convenient because you may not have a watch.”  
14  
15 HW-007-FG3.  
16

17  
18  
19  
20 It is important to acknowledge the novelty of ALRITE as a mHealth app technology likely  
21  
22 contributed to high acceptability by health workers as well.  
23  
24  
25

26 “[Providers] usually like new technology, I think they will be excited to use it and  
27  
28 therefore they are likely to download [the app]. In addition, people prefer digital  
29  
30 information than opening and reading what is in the [IMCI] book.” HA-003  
31  
32  
33

34  
35 Respondents had ideas for improving acceptability, appropriateness, and potential benefit of  
36  
37 ALRITE. Health workers asked for additional automated or semi-automated smartphone tools,  
38  
39 such as pulse oximetry or digital auscultation to be integrated into ALRITE. Multiple health  
40  
41 workers commented on the potential for storage of clinical information. One health worker  
42  
43 wanted to use it as a personal quality control device to review his previous diagnoses and  
44  
45 treatment plans. A few wanted the app expanded to other disease processes and age groups.  
46  
47 Some health workers suggested incorporating additional educational components targeted to  
48  
49 patients and families. One health worker suggested incorporating risk stratification for children  
50  
51 with chronic disease and environmental risk factors (i.e. smoke exposure, crowded housing) in  
52  
53 order to focus on prevention.  
54  
55  
56  
57  
58  
59  
60

1  
2  
3 “[In the app], we are missing [a question on] the type of fuel used at home to cook  
4 and source of light. Some produce a lot of smoke. [By offering recommendations,  
5 families] can change the way of cooking, hence reducing exposures. This could help  
6 in prevention [of respiratory diseases]. We therefore can make a recommendation  
7 and follow up in about 6 months.” HW-005-FG3  
8  
9  
10  
11  
12  
13  
14  
15

### 16 ALRITE usability

17 We defined usability as “the design factors that affect the user experience of operating the  
18 application’s device and navigating the application for its intended purpose.”<sup>18</sup> ALRITE features  
19 that contributed to a positive user experience included overall design, simplicity, flow, and clarity  
20 of diagnosis. Generally, health workers thought the app was easy to follow and would be quick  
21 to get to diagnosis.  
22  
23  
24  
25  
26  
27  
28  
29

30 “It saves time. You diagnose very fast and you are able to know the treatment to give  
31 so it improves on the appropriate management of patients.” HW-001-FG1  
32  
33  
34  
35  
36

37 When given the opportunity to use the mHealth tool, health workers who owned smartphones  
38 were more facile with ALRITE than those who owned simple mobile phones. Importantly, after  
39 practicing with ALRITE and receiving coaching from the research team, all health workers  
40 became more facile using ALRITE. Proficiency with the app was not formally tested.  
41  
42  
43  
44  
45  
46

47 Health workers provided valuable feedback to improve the usability of ALRITE, including minor  
48 changes to the visual display, layout, and flow of the app. For example, health workers  
49 recommended larger font for better visualization. They also recommended using a patient age  
50 group instead of date of birth for 2 reasons: 1) health workers had difficulty using the calendar  
51  
52  
53  
54  
55  
56  
57  
58  
59  
60

1  
2  
3 function, and 2) caregivers may not know a child's date of birth, so asking for a child's age  
4 group is standard practice.  
5  
6  
7

#### 8 9 Provider-specific needs

10  
11 Another important consideration to ALRITE acceptability is the end user's experience with  
12 smartphones. In our study, all health workers owned a mobile phone, of which approximately  
13 60% owned a smartphone. Most who owned a smartphone used social media or communication  
14 apps. No health workers we spoke with were using mHealth apps, and only a few had heard of  
15 these types of apps.  
16  
17  
18  
19  
20  
21  
22  
23

24 All those with smartphones preferred that ALRITE be directly downloaded to their personal  
25 devices compared to clinic-supplied devices, as they would be more likely to use the app if it  
26 were readily available on their own smartphones. Additionally, if health workers used the app on  
27 their own smartphones rather than a clinic-supplied device, they said they would be less likely to  
28 lose or misplace the device. However, one health worker reminded the group that not everyone  
29 has a smartphone, so smartphones would need to be made available to individuals without a  
30 personal device. Health workers were pleased that the size of the app was only (27Mb).  
31  
32  
33  
34  
35  
36  
37  
38  
39  
40

41 The provider's training level was also an important factor. In different levels of health centers in  
42 Uganda, there are health workers with varying levels of training and provider roles, ranging from  
43 nurse to medical officer. End users with limited clinical training may be more likely to use  
44 ALRITE in practice to help with clinical decision-making than others with more training or clinical  
45 experience who may not think additional clinical decision support adds value to their clinical  
46 care.  
47  
48  
49  
50  
51  
52  
53  
54  
55  
56  
57  
58  
59  
60

1  
2  
3 “There are incidences when the doctors are not at the clinic and the nurse needs to  
4 make a diagnosis and give treatment as well. ALRITE will save time.” HA-001  
5  
6  
7  
8

#### 9 Provider-patient relationship

10 Health workers had some concerns regarding ALRITE use in their clinic. Some thought that  
11 using the app in front of patients and families would reduce the quality and quantity of personal  
12 interaction at a clinic visit. Some also expressed concern that if they used ALRITE to help make  
13 clinical decisions, families would lose trust in health workers’ ability to diagnose and treat.  
14 However, one respondent also suggested that the app could be used as an educational tool for  
15 families and help build trust during the visit.  
16  
17  
18  
19  
20  
21  
22  
23  
24  
25

26 “The first challenge is on the side of our clients. When you are busy using the app,  
27 the client might think you’re neglecting her or him and you’re busy on WhatsApp, and  
28 secondly, a client might think you’re not knowledgeable enough since you’re using a  
29 phone and lose trust in you thinking you don’t know what to do... But I think I can  
30 start by engaging the patients and informing them that what I am going to do is for  
31 your good, I am not just looking for answers but rather improving diagnosis for your  
32 child.” HW-003-FG2  
33  
34  
35  
36  
37  
38  
39  
40  
41  
42

#### 43 **Clinic-level**

44 Limited resources

##### 45 *High patient volume and limited staffing*

46  
47 At the peri-urban site, 100-300 patients are seen in the ambulatory clinic daily, 60% of which are  
48 children (IC-001). Similarly, at the rural site, a stakeholder reported, “we see about 100-200  
49 patients daily... and about 45% of these are children less than 5 years.” (IC-003). Stakeholders  
50 identified the most common pediatric conditions: malaria, ALRI, and diarrhea. A combination of  
51  
52  
53  
54  
55  
56  
57  
58  
59  
60

1  
2  
3 clinical officers and nurses without specialty pediatric training see pediatric patients at both  
4 sites. The peri-urban site also staffs a few general medical doctors, but they are not always on  
5 site. All health workers reported they received IMCI training, from which Uganda Clinical  
6 Guidelines are derived.<sup>26</sup> Health workers reported that visit length typically ranges from 10-15  
7 minutes, but a few reported they often take less than 10 minutes.  
8  
9  
10  
11  
12  
13  
14  
15

16 “In assessing children, we have a challenge with patient load with few trained health  
17 workers who can assess patients. It’s a facility in a semi-urban area so the numbers are  
18 big with few health workers, and treatment is not always available.” HA-001  
19  
20  
21  
22  
23

#### 24 *Limited resources for the diagnosis of pediatric respiratory disease*

25 To diagnose respiratory disease, both sites reported use of stethoscopes, although these are  
26 not universally available, nor are they required to use IMCI. They rely on personal watches to  
27 count respiratory rate, but not everyone has a watch. Pulse oximetry is not typically available.  
28  
29  
30  
31  
32  
33

34 “We have one pulse oximeter in [the operating] theater, but we are currently not using it  
35 because it gives confusing results.” HA-003  
36  
37  
38  
39  
40

41 “It is not a problem [to use a stethoscope], but if it is not available, we resort to the IMCI  
42 approach where you depend on a physical exam [without a stethoscope]. In addition,  
43 what compromises quality is the number of patients waiting in the line to be reviewed,  
44 and you may end up missing out on an important indicator.” HW-002-FG3  
45  
46  
47  
48  
49  
50

#### 51 *Limited resources and training affecting adherence to WHO IMCI*

52 All health workers received WHO IMCI training. However, they reported that adherence to IMCI  
53 can be challenging for a number of reasons. Firstly, IMCI incorporates respiratory rate and  
54  
55  
56  
57  
58  
59  
60

1  
2  
3 evaluation of respiratory distress into its clinical decision algorithm. Some health workers  
4 reported that counting respiratory rate is impossible without a watch or timer. Secondly, IMCI  
5 recommends evaluation of wheezing, but this exam finding is challenging to diagnose,  
6 especially without a stethoscope.  
7  
8  
9  
10

11  
12  
13  
14 “[Chest] indrawing is easier [to assess] compared to wheezing.” HW-001-FG3  
15

16  
17  
18 “Monitoring during the care of these children or reassessing the vitals is a challenge.”  
19  
20 HW-003-FG3  
21

22  
23  
24 Health workers frequently denied opportunities for robust continuing medical education or  
25 refresher trainings for IMCI.  
26  
27

28  
29  
30 “We have sent people for IMCI training. We also have a national trainer at the facility  
31 who organizes [continuous medical education], but the turnout of health workers is  
32 usually not good. Usually, when people do something for many years, they tend to  
33 think there is nothing new they can learn.” HA-003  
34  
35  
36  
37  
38  
39  
40

41 Thirdly, availability and use of the IMCI materials are limited in health centers. IMCI can be  
42 available in paper or electronic form. However, health workers reported that the paper form is  
43 not convenient to use due to the size of the booklet and the likelihood of misplacing it. One  
44 health administrator reported that his health center had IMCI installed on a laptop, but the laptop  
45 broke and was not replaced.  
46  
47  
48  
49  
50

51  
52  
53 ALRITE integration into existing health system

54  
55  
56 *Change to workflow*  
57  
58

1  
2  
3 Integrating ALRITE into clinical practice will inevitably change clinic workflow. It may contribute  
4 to duplicative work because the current system includes entering data into a written health  
5 record. Interestingly, this was not brought up as a concern during focus groups or interviews.  
6  
7 Furthermore, using a new technology will be slow at first and may make patient encounters  
8 longer rather than shorter in an already busy clinic. Health workers reported that they would  
9 need to practice with ALRITE prior to using it with patients to improve work efficiency.  
10  
11  
12  
13  
14  
15  
16  
17

18 “At first, it’s likely to slow the work because we may be learning the app but with time  
19 it will become part of us, and we become part of it so it will ease the work... we need  
20 to be familiar with it to help us save time so that patients do not see us take a lot of  
21 time on the phones.” HW-002-FG2  
22  
23  
24  
25  
26  
27

28 “I think we shall have to sort out those with respiratory illnesses at triage which is  
29 different from what is being done currently where all patients follow the same  
30 assessment route regardless of condition.” HW-001-FG1  
31  
32  
33  
34  
35  
36

37 Furthermore, current practice in Ugandan health centers does not routinely include  
38 reassessment of patients after a bronchodilator trial, which is necessary to ascertain whether  
39 patients would benefit from treatment with a bronchodilator. Most health workers thought it  
40 would be feasible to reassess patients if warranted; however, a few health workers reported that  
41 many patients leave after the initial assessment. Lack of reassessment would limit providers’  
42 ability to determine bronchodilator responsiveness, an important factor in diagnosing wheezing  
43 illnesses and asthma in young children and therefore an important component of ALRITE.  
44  
45  
46  
47  
48  
49  
50  
51  
52

53 “We reassess only those who are admitted on the wards. We reassess if the child  
54 worsens, but if they are improving, we reassess them the next day during the ward  
55  
56  
57  
58  
59  
60

1  
2  
3 rounds. I think it's important to integrate the app into the system because it gives  
4 reminders about reassessing a patient." HA-001  
5  
6  
7

8  
9 "There is no opportunity [to reassess children] because most of them come from far  
10 and do not usually come back [after treatment is prescribed]." HW-001-FG3  
11  
12  
13

### 14 15 *Triage*

16 One current challenge and potential opportunity for ALRITE integration is in patient triage.  
17  
18 Health administrators reported no formal triage process to risk-stratify patients as they present  
19 to care. There is also no separate pediatric clinic. All patients are seen in the order they arrive,  
20 whether adults or children. One health administrator saw ALRITE implementation as an  
21 opportunity to establish triage at their health center. He suggested that ALRITE could be used  
22 earlier when pediatric patients arrive to the clinic to prioritize those with WHO danger signs and  
23 acute respiratory distress.  
24  
25  
26  
27  
28  
29  
30  
31  
32  
33  
34

35 "[Challenges include] lack of a dedicated clinician to manage children and lack of  
36 enough consultation rooms. There is also a knowledge gap in assessing children. We do  
37 not have a triage area where we are able to prioritize those with worse conditions. We  
38 usually just do visual observation of who is an emergency situation instead of taking  
39 medical history and a few vitals. The other issue is we don't differentiate children from  
40 adults, they all go through the same entry point... The other [issue] is lack of an  
41 emergency unit for children with severe difficulty in breathing." HA-003  
42  
43  
44  
45  
46  
47  
48  
49  
50

### 51 **Systems-level**

52 Medication shortages impacting ALRITE management  
53  
54  
55  
56  
57  
58  
59  
60



1  
2  
3 Aside from features of ALRITE itself, we explored other factors that would impact feasibility of  
4 ALRITE at a systems level. ALRITE recommends treatment for children with respiratory  
5 illnesses, including antibiotics for pneumonia and inhaled bronchodilators with/without systemic  
6 corticosteroids for wheezing. Oral salbutamol is generally available at the health centers and  
7 sometimes used for children but carries a high side effect profile and is not recommended for  
8 acute wheezing in children.<sup>27 28</sup> Health administrator at both sites reported very limited  
9 availability of inhaled bronchodilators (2-3 inhalers every 2 months). Health workers may  
10 prescribe medications if not available on site, but this requires family members to pay out-of-  
11 pocket for prescribed medications at an off-site pharmacy or higher-level health center. Even if  
12 ALRITE improves diagnosis of wheezing illness, its impact and feasibility will be greatly limited if  
13 appropriate treatment is not readily available.  
14  
15  
16  
17  
18  
19  
20  
21  
22  
23  
24  
25  
26  
27

28 “We are not independent when it comes to drugs. Supplies are from National Medical  
29 Stores, and they usually give what they have unless you have an independent  
30 source outside of the usual supply chain.” HA-002  
31  
32  
33  
34  
35  
36

37 “The app talks about the bronchodilator, but it doesn’t talk about other drugs to give.  
38 Here at the low-level facilities we do not have the bronchodilators.” HW-002-FG1  
39  
40  
41  
42

### 43 Stakeholder buy-in

44 While not a common theme, one health administrator emphasized the importance of engaging  
45 stakeholders early for successful implementation. Specifically, the administrator explained that  
46 the Ministry of Health in Uganda and local district health officials would need to approve the app  
47 prior to large scale distribution across public and private facilities. Additionally, support at these  
48 leadership levels will be critical for widespread uptake and implementation of ALRITE.  
49  
50  
51  
52  
53  
54  
55  
56  
57  
58  
59  
60

## DISCUSSION

In this study, we identified key determinants towards successful implementation of ALRITE, our mHealth decision support tool, from frontline health workers' perspectives (Figure 2). In addition to ALRITE-specific determinants, health workers and administrators identified important individual-level, clinic-level, and health systems-level determinants and offered innovative ideas for future app development. Overall, these results support ongoing development of ALRITE for potential integration into routine clinical care and underscore the importance of user-centered design early in development prior to implementation of a new technology. ALRITE, if successfully implemented, has the potential to improve childhood morbidity and mortality in three major ways: 1) increased awareness, diagnosis and treatment of wheezing illness, 2) improved IMCI guideline adherence through prompts and education, and 3) effective triage of critically ill infants and children. Potential challenges identified include changes to the provider-patient relationship, time constraints, and medication shortages. However, through thoughtful design and implementation, ALRITE has potential to overcome these challenges by enhancing the provider-patient relationship through education and improved management, improving clinical efficiency through a streamlined process, and increasing supply of life-saving medications such as inhaled bronchodilators through increased awareness, advocacy, and demand.

Additional strengths of the study include using a technology probe and human-centered, participatory approach early in mHealth development to engage participants and gather information not only about the specific mHealth tool but also to build an underpinning knowledge of factors that are pivotal to the ultimate success of a mHealth application. We partnered with local health officials in the planning phase to encourage health worker attendance to information sessions, which translated in almost all eligible health workers at each site participating in the study to provide a more accurate and complete on-the-ground assessment at each study site.

1  
2  
3 We also included health administrators as participants to provide a broader understanding of the  
4 clinic context, challenges, day-to-day operations, and feasibility of ALRITE from a systems  
5 standpoint, adding a unique perspective to the health workers' responses.  
6  
7  
8  
9

10  
11 Previous studies have also evaluated mHealth decision support based on WHO IMCI.<sup>17-19</sup> The  
12 predecessor to ALRITE, mPneumonia, demonstrated high acceptability and usability in pilot  
13 studies in Ghana.<sup>17 18</sup> Unlike ALRITE, mPneumonia was designed to use on clinic-supplied  
14 tablets. Health workers were not as familiar with smartphones and had difficulty navigating the  
15 application and general tablet use.<sup>17</sup> Furthermore, health workers expressed potential  
16 challenges of mPneumonia including access to electricity and added time to patient  
17 encounters.<sup>18</sup> The disparate results between mPneumonia and ALRITE likely reflects interval  
18 improvements in devices and software as well as additional experience with smartphones given  
19 growing mobile phone use worldwide.  
20  
21  
22  
23  
24  
25  
26  
27  
28  
29  
30

31  
32 Two important systematic reviews of health workers' perspectives using mHealth in primary  
33 care highlighted similar themes.<sup>21 29</sup> Decision support mHealth tools achieved high acceptability,  
34 with health workers reporting increased efficiency, better access to information, and improved  
35 adherence to guidelines.<sup>21</sup> Similar to our results, some health workers were concerned mHealth  
36 may negatively impact the provider-patient relationship,<sup>21</sup> but this concern has not been  
37 evaluated by patients or caregivers. Contrary to our results, some health workers were  
38 concerned the algorithm was too prescriptive for clinical decision making.<sup>21</sup> We found that health  
39 workers appreciated the simple ALRITE algorithm, which may reflect the limited clinical training  
40 in our study population. Additional factors influencing health workers' acceptability of mHealth  
41 technologies were cost to the health worker, previous mobile phone experience, and increased  
42 time/workload.<sup>29</sup> While our study did not evaluate cost, as ALRITE would be a free application,  
43 health workers did appreciate that ALRITE had a small footprint (27 Mb) so would not require  
44  
45  
46  
47  
48  
49  
50  
51  
52  
53  
54  
55  
56  
57  
58  
59  
60

1  
2  
3 much data or take up much smartphone memory. Conversely, health worker perceptions of  
4 ALRITE did not change based on prior mobile phone experience, but those with smartphone  
5 experience were much more facile with the app.  
6  
7  
8  
9

10  
11 There has been a recent explosion of digital health tools for use in LMICs, but evidence on  
12 effectiveness and scale-up has been lacking.<sup>11 16 30 31</sup> An early human-centered approach to  
13 evaluation is critical to better understand determinants of successful implementation and to  
14 guide further mHealth design. Therefore, we included health administrators and frontline health  
15 workers early in the development of ALRITE as participants to better inform acceptability,  
16 appropriateness, and feasibility of its use in Ugandan health centers. Through stakeholder  
17 interviews and health worker focus groups, we not only received important feedback to improve  
18 ALRITE, but also gained a richer understanding of the health setting and potential systems-  
19 based and individual level challenges to implementation.  
20  
21  
22  
23  
24  
25  
26  
27  
28  
29  
30

31  
32 This study had important limitations. First, perceptions of health workers were limited to two  
33 health facilities in Uganda. We purposefully chose one peri-urban and one rural health center to  
34 better understand differences in resource availability, staffing, and health workers' perceptions.  
35 However, there may be additional regional differences in perceptions of and comfort with  
36 ALRITE that have yet to be explored. Secondly, it may be possible that we did not capture the  
37 full breadth of perspectives, as health workers with dissenting opinions may not have felt  
38 comfortable speaking up during focus groups. We tried to address this by probing for dissenting  
39 opinions during focus groups and while health workers were practicing with the app in smaller  
40 groups. Thirdly, we did not perform formal quantitative usability evaluations. A formal evaluation  
41 of end user proficiency was not the objective of this study because the ALRITE app was still in  
42 the prototype phase. Finally, health worker perceptions were obtained without experience using  
43  
44  
45  
46  
47  
48  
49  
50  
51  
52  
53  
54  
55  
56  
57  
58  
59  
60

1  
2  
3 ALRITE in clinical practice. This understanding of feasibility in clinical care will be a major focus  
4  
5 of future work.  
6  
7  
8

9  
10 Next steps include updating ALRITE based on user feedback and field testing with frontline  
11  
12 health workers. We will also address important potential barriers for implementation, including  
13  
14 engaging caregivers, streamlining the ALRITE app to limit any negative effect on existing  
15  
16 workflow, developing training programs, ensuring readily available technical support, and  
17  
18 engaging key stakeholders at the Uganda Ministry of Health and district health leadership to  
19  
20 support further research, medication supply, and ultimate implementation of ALRITE.  
21  
22  
23

## 24 **CONCLUSION**

25  
26 Taken together, these results provide a detailed, on-the-ground assessment of the opportunities  
27  
28 and challenges in the respiratory assessment, diagnosis and treatment of ALRI in young  
29  
30 children. Further, the engagement of health workers and richness of data collected support the  
31  
32 use of human-centered approaches early-on to identify factors that are pivotal to success of a  
33  
34 mHealth application. Finally, our results support the continued development of tailored mHealth  
35  
36 tools for decision support in LMICs based on high user acceptability and usability.  
37  
38  
39  
40  
41  
42  
43  
44  
45  
46  
47  
48  
49  
50  
51  
52  
53  
54  
55  
56  
57  
58  
59  
60

### **Data availability**

Data supporting the findings are available within the manuscript. Additional quotes are available upon reasonable request to the corresponding author.

### **Acknowledgements**

We would like to sincerely thank all health workers and health facility in-charges who participated in this study. We are also grateful to the Jinja District Health Office who gave permission and support to conduct the study.

### **Author contributions**

LEE, MR, JWS, AV, RA, and RN contributed to the concept and study design. AJK developed the mobile health application with mentorship from AV and RA. LEE, IN, and RN coordinated and supervised data collection from the sites. LEE, MR, SAF, IN, BN, and ZN performed data collection. LEE, SAF, and IN analyzed the data, and all authors contributed to interpretation. LEE wrote the draft of the manuscript. RN provided oversight of the project. All authors worked collaboratively to review, edit, and approve the final manuscript.

### **Competing interests**

The authors report no competing interests.

### **Funding**

This work was supported by the University of Washington Global Innovation Fund, the Firland Foundation, the Arthur Rosenfeld Endowment for Pediatric Pulmonary Fellows, and the NIH NHLBI (Grant number 5K12HL137940).

## References

1. Liu L, Oza S, Hogan D, et al. Global, regional, and national causes of child mortality in 2000–13, with projections to inform post-2015 priorities: an updated systematic analysis. *The Lancet* 2015;385(9966):430-40. doi: 10.1016/s0140-6736(14)61698-6
2. GBD 2015 Child Mortality Collaborators. Global, regional, national, and selected subnational levels of stillbirths, neonatal, infant, and under-5 mortality, 1980-2015: a systematic analysis for the Global Burden of Disease Study 2015. *Lancet (London, England)* 2016;388(10053):1725-74. doi: 10.1016/s0140-6736(16)31575-6 [published Online First: 2016/10/14]
3. Walker CLF, Rudan I, Liu L, et al. Global burden of childhood pneumonia and diarrhoea. *The Lancet* 2013;381(9875):1405-16. doi: 10.1016/s0140-6736(13)60222-6
4. Zar HJ, Ferkol TW. The global burden of respiratory disease-impact on child health. *Pediatr Pulmonol* 2014;49(5):430-4. doi: 10.1002/ppul.23030 [published Online First: 2014/03/13]
5. McAllister DA, Liu L, Shi T, et al. Global, regional, and national estimates of pneumonia morbidity and mortality in children younger than 5 years between 2000 and 2015: a systematic analysis. *The Lancet Global Health* 2019;7(1):e47-e57. doi: 10.1016/s2214-109x(18)30408-x
6. IHME. Uganda Country Profile 2016 [updated 2016. Available from: <http://www.healthdata.org/uganda> accessed October 19 2018.
7. World Health Organization. Integrated Management of Childhood Illness, 2014.
8. Nantanda R, Tumwine JK, Ndeezi G, et al. Asthma and pneumonia among children less than five years with acute respiratory symptoms in Mulago Hospital, Uganda: evidence of under-diagnosis of asthma. *PLoS One* 2013;8(11):e81562. doi: 10.1371/journal.pone.0081562 [published Online First: 2013/12/07]

- 1  
2  
3 9. Kjaergaard J, Anastasaki M, Stubbe Ostergaard M, et al. Diagnosis and treatment of acute  
4  
5 respiratory illness in children under five in primary care in low-, middle-, and high-income  
6  
7 countries: A descriptive FRESH AIR study. *PLoS One* 2019;14(11):e0221389. doi:  
8  
9 10.1371/journal.pone.0221389 [published Online First: 2019/11/07]
- 10  
11 10. (CIPESA) TCoIIPfEaSA. National Information Technology Survey 2017/18 Report: CIPESA,  
12  
13 2018:274.
- 14  
15 11. Agarwal S, Perry HB, Long LA, et al. Evidence on feasibility and effective use of mHealth  
16  
17 strategies by frontline health workers in developing countries: systematic review. *Trop*  
18  
19 *Med Int Health* 2015;20(8):1003-14. doi: 10.1111/tmi.12525
- 20  
21 12. Kallander K, Tibenderana JK, Akpogheneta OJ, et al. Mobile health (mHealth) approaches  
22  
23 and lessons for increased performance and retention of community health workers in  
24  
25 low- and middle-income countries: a review. *J Med Internet Res* 2013;15(1):e17. doi:  
26  
27 10.2196/jmir.2130
- 28  
29 13. Lodhia V, Karanja S, Lees S, et al. Acceptability, Usability, and Views on Deployment of  
30  
31 Peek, a Mobile Phone mHealth Intervention for Eye Care in Kenya: Qualitative Study.  
32  
33 *JMIR mHealth and uHealth* 2016;4(2):e30. doi: 10.2196/mhealth.4746 [published Online  
34  
35 First: 2016/05/11]
- 36  
37 14. Medhanyie AA, Little A, Yebyo H, et al. Health workers' experiences, barriers, preferences  
38  
39 and motivating factors in using mHealth forms in Ethiopia. *Human Resources for Health*  
40  
41 2015;13(2) doi: doi:10.1186/1478-4491-13-2
- 42  
43 15. Velez O, Okyere PB, Kanter AS, et al. A usability study of a mobile health application for  
44  
45 rural Ghanaian midwives. *Journal of midwifery & women's health* 2014;59(2):184-91. doi:  
46  
47 10.1111/jmwh.12071 [published Online First: 2014/01/10]
- 48  
49 16. Aranda-Jan CB, Mohutsiwa-Dibe N, Loukanova S. Systematic review on what works, what  
50  
51 does not work and why of implementation of mobile health (mHealth) projects in Africa.  
52  
53 *BMC public health* 2014;144:188.
- 54  
55  
56  
57  
58  
59  
60



- 1  
2  
3 17. Ginsburg AS, Delarosa J, Brunette W, et al. mPneumonia: Development of an Innovative  
4  
5 mHealth Application for Diagnosing and Treating Childhood Pneumonia and Other  
6  
7 Childhood Illnesses in Low-Resource Settings. *PLoS One* 2015;10(10):e0139625. doi:  
8  
9 10.1371/journal.pone.0139625 [published Online First: 2015/10/17]  
10
- 11 18. Ginsburg AS, Tawiah Agyemang C, Ambler G, et al. mPneumonia, an Innovation for  
12  
13 Diagnosing and Treating Childhood Pneumonia in Low-Resource Settings: A Feasibility,  
14  
15 Usability and Acceptability Study in Ghana. *PLoS One* 2016;11(10):e0165201. doi:  
16  
17 10.1371/journal.pone.0165201  
18
- 19 19. Rambaud-Althaus C, Shao A, Samaka J, et al. Performance of Health Workers Using an  
20  
21 Electronic Algorithm for the Management of Childhood Illness in Tanzania: A Pilot  
22  
23 Implementation Study. *Am J Trop Med Hyg* 2017;96(1):249-57. doi: 10.4269/ajtmh.15-  
24  
25 0395  
26  
27
- 28 20. Keitel K, D'Acremont V. Electronic clinical decision algorithms for the integrated primary care  
29  
30 management of febrile children in low-resource settings: review of existing tools. *Clin*  
31  
32 *Microbiol Infect* 2018;24(8):845-55. doi: 10.1016/j.cmi.2018.04.014 [published Online  
33  
34 First: 2018/04/24]  
35
- 36 21. WHO guideline: recommendations on digital interventions for health system strengthening.  
37  
38 Geneva: World Health Organization 2019.  
39
- 40 22. Hutchinson H, Mackay W, Westerlund B, et al. Technology probes: inspiring design for and  
41  
42 with families. Proceedings of the SIGCHI Conference on Human Factors in Computing  
43  
44 Systems. Ft. Lauderdale, Florida, USA: Association for Computing Machinery, 2003:17-  
45  
46 24.  
47  
48
- 49 23. Creswell JW, Plano Clark VL. Designing and conducting mixed methods research. Third  
50  
51 edition. ed. Thousand Oaks, California: SAGE 2018.  
52
- 53 24. Harris PA, Taylor R, Thielke R, et al. Research electronic data capture (REDCap)--a  
54  
55 metadata-driven methodology and workflow process for providing translational research  
56  
57  
58  
59  
60

- 1  
2  
3 informatics support. *J Biomed Inform* 2009;42(2):377-81. doi: 10.1016/j.jbi.2008.08.010  
4  
5 [published Online First: 2008/10/22]  
6  
7 25. O'Brien BC, Harris IB, Beckman TJ, et al. Standards for reporting qualitative research: a  
8  
9 synthesis of recommendations. *Acad Med* 2014;89(9):1245-51. doi:  
10  
11 10.1097/ACM.0000000000000388 [published Online First: 2014/07/01]  
12  
13 26. Uganda Clinical Guidelines. Fourth ed. Kampala, Uganda: Ministry of Health Uganda 2016.  
14  
15 27. Global Strategy for Asthma Management and Prevention: MCR VISION, Inc. 2006.  
16  
17 28. World Health Organization Model List of Essential Medicines for Children. 7th Edition ed.  
18  
19 Geneva: World Health Organization 2019.  
20  
21 29. Odendaal WA, Anstey Watkins J, Leon N, et al. Health workers' perceptions and  
22  
23 experiences of using mHealth technologies to deliver primary healthcare services: a  
24  
25 qualitative evidence synthesis. *Cochrane Database Syst Rev* 2020;3:CD011942. doi:  
26  
27 10.1002/14651858.CD011942.pub2 [published Online First: 2020/03/28]  
28  
29 30. Tomlinson M, Rotheram-Borus MJ, Swartz L, et al. Scaling up mHealth: where is the  
30  
31 evidence? *PLoS Med* 2013;10(2):e1001382. doi: 10.1371/journal.pmed.1001382  
32  
33 [published Online First: 2013/02/21]  
34  
35 31. Hall CS, Fottrell E, Wilkinson S, et al. Assessing the impact of mHealth interventions in low-  
36  
37 and middle-income countries--what has been shown to work? *Global health action*  
38  
39 2014;7:25606. doi: 10.3402/gha.v7.25606 [published Online First: 2014/11/02]  
40  
41  
42  
43  
44  
45  
46  
47  
48  
49  
50  
51  
52  
53  
54  
55  
56  
57  
58  
59  
60

1  
2  
3 **Figure 1.** ALRITE sample screenshots. A) Menu screen. B) Respiratory rate counter. C)  
4 Example of diagnosis and treatment recommendations. D) Educational toolkit pop-up on  
5 bronchodilator administration. E) Educational toolkit pop-up on stridor.  
6  
7  
8  
9

10  
11 **Figure 2.** Frontline health workers' perspectives of determinants of ALRITE implementation.  
12  
13  
14  
15  
16  
17  
18  
19  
20  
21  
22  
23  
24  
25  
26  
27  
28  
29  
30  
31  
32  
33  
34  
35  
36  
37  
38  
39  
40  
41  
42  
43  
44  
45  
46  
47  
48  
49  
50  
51  
52  
53  
54  
55  
56  
57  
58  
59  
60

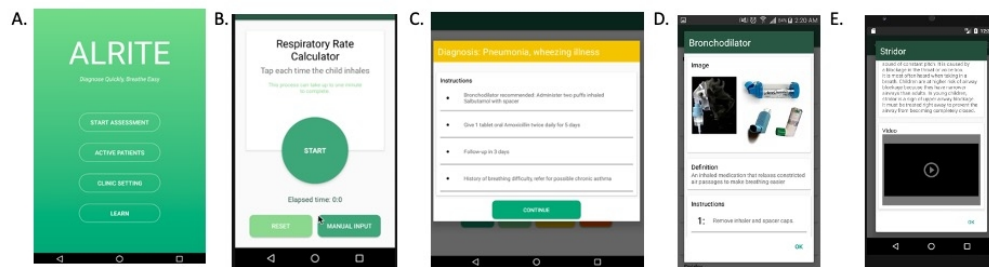

Figure 1. ALRITE sample screenshots. A) Menu screen. B) Respiratory rate counter. C) Example of diagnosis and treatment recommendations. D) Educational toolkit pop-up on bronchodilator administration. E) Educational toolkit pop-up on stridor.

325x87mm (72 x 72 DPI)

1  
2  
3  
4  
5  
6  
7  
8  
9  
10  
11  
12  
13  
14  
15  
16  
17  
18  
19  
20  
21  
22  
23  
24  
25  
26  
27  
28  
29  
30  
31  
32  
33  
34  
35  
36  
37  
38  
39  
40  
41  
42  
43  
44  
45  
46  
47  
48  
49  
50  
51  
52  
53  
54  
55  
56  
57  
58  
59  
60



Figure 2. Frontline health workers' perspectives of determinants of ALRITE implementation.

228x112mm (72 x 72 DPI)

## In-depth Interviews: Facilitator's Guide

### I. Basic information

Tell me about your health center:

- how busy
- proportion of children you see vs adults
- common problems that children come with
- use of WHO IMCI routinely
- when thinking specifically about respiratory disease in children,
  - o what is the range of severity?
  - o Diagnostic tools available?
  - o Treatment?
  - o Diagnoses?
  - o Referral to hospital? Referrals to specialty care?
  - o How comfortable are providers in assessing and treating children?
  - o What kind of training do they receive? Is there any refresher training or CME?
  - o What are the biggest challenges at your health center in diagnosing and treating children with respiratory illness?
  - o how common do you think asthma/recurrent wheezing is in the young children that you see?
  - o Which asthma medicines do you commonly use in this health facility? Availability of asthma medications both in the clinic and to take home?

### II. Brief demonstration of ALRITE

This app is 27 Mb. Do you think providers would be willing/interested in downloading to their personal device?

*Start with brief demonstration, then give time to use the app.*

### III. General comments – ALRITE tool as mobile app (spend less time here)

- What did you like about the app?
- What did you think could be improved?
- How could this app help fill a need in your health center? What parts of the app could be the most helpful?
- Where do you see challenges with using the app?

### IV. Feasibility of ALRITE tool

1) Bronchodilator timing and reevaluation.

- Tell me about use of bronchodilators in this clinic. Are they often prescribed? How are they given (oral/inhaler/nebulizer)? How are they supplied to the clinic? How are they supplied to the patient?
- This tool requires reassessment if a bronchodilator is given to evaluate whether it was helpful or not. How is that different from current practice? Is reassessment usually done?
  - o What are barriers not to reassess?

2) Integration into clinical practice

- How can we avoid extra work that may be caused by using the app?

- 1 - Biggest challenges/barriers to use?
- 2 - What kind of training is required to use the app successfully?
- 3 - Interest in using stored information in the app as a form of electronic medical record?

11 **If there's time (and hasn't been addressed during the interview)...**

12 What is the supply chain like for bronchodilators and other medications? Are there some that are always  
13 reliably available vs others?

14 Limitations/challenges that you see regarding resource availability? If so, what specifically?

15 Challenges with diagnosis of asthma

- 16 - can patients access inhaled bronchodilator, spacers if they were helpful
- 17 - how often do you refer for specialty care; for what indications; level of respiratory support
- 18 - how common do you think asthma/recurrent wheezing is in the young children that you see
- 19 - Is there a stigma associated around the diagnosis of asthma?
- 20 - Availability of asthma medications both in the clinic and outpatient. Pharmacy – how often dispensed.

21 What supply is like in pharmacy. How often prescribed by clinicians?

- 22 - workflow of a patient from start to finish
- 23 - Limitations/challenges that you see regarding resource availability? If so, what specifically?

## **Focus Group: Facilitator's Guide**

### **I. Brief demonstration of ALRITE (5 min)**

This app is 27 Mb. Would you be willing/interested in downloading?

Outline for focus group

1. Information about your health center
2. Feedback on ALRITE app
3. Feasibility of using app within health setting

### **II. Basic information**

Please raise hand if:

- a. you own a mobile phone
- b. that mobile phone is a smart phone
- c. you regularly use applications on your phone (ex: Facebook, Whatsapp, games...)
- d. you have used a mobile health application
- e. you have completed the WHO IMCI training  
(count and record for each)

Ice breaking questions (choose 1 or 2)

- how often do you see kids compared to adults in your setting?
- What is the typical workflow of children coming into clinic with respiratory complaints? (*how patients move from arrival to discharge and treatment*)
- What are the most common diagnoses that you give to children who come to clinic with respiratory symptoms?
- what kind of equipment and treatments do you have to take care of children with respiratory disease?

### **III. General comments – ALRITE tool as mobile app (25 min)**

- What are your general thoughts about the app?
- What did you think could be improved?
- Is there anything that you would remove from the app? Or add?
- Would this be something you would prefer to have on your personal phone or keep on a hospital phone/tablet?
- How could this app help fill a need in your clinical setting?
- Where do you see challenges with using the app?

### **IV. Feasibility of ALRITE tool (20 min)**

3) Bronchodilator timing and reevaluation.

- Tell us about your experience treating children with inhaled bronchodilators.
- The ALRITE app asks to reassess children after receiving a bronchodilator after 10 minutes. If you give bronchodilators to children, do you typically reassess them afterwards? Tell more about it. What are the challenges to perform a reassessment?

4) Integration into clinical practice

- How do you think using this app would change your workload?



- 1 - Do you think this app will change the flow of patients that you described earlier? Please elaborate.  
2 - Biggest challenges/barriers to use?  
3

4 **V. IMCI decision tree & Respiratory assessment (if there is time)**

- 5 - How does this protocol/decision tree follow how you currently assess patients in your clinic?  
6 - Do you think the application impacts your ability to perform respiratory assessment? If so, how? If not,  
7 what would make it more useful?  
8  
9

10  
11 **Closing comments**  
12  
13  
14  
15  
16  
17  
18  
19  
20  
21  
22  
23  
24  
25  
26  
27  
28  
29  
30  
31  
32  
33  
34  
35  
36  
37  
38  
39  
40  
41  
42  
43  
44  
45  
46  
47  
48  
49  
50  
51  
52  
53  
54  
55  
56  
57  
58  
59  
60

For peer review only

# Introduction to ALRITE & Usability test

## Description of ALRITE

ALRITE is a mobile health application that was created to help diagnose and manage acute respiratory illnesses in young children. The goal of the app is to provide decision support to healthcare providers for children with acute respiratory complaints. The app contains a decision tree based on the World Health Organization's (WHO) Integrated Management of Childhood Illness (IMCI) case management guidelines.

One unique addition is that ALRITE will guide you through a respiratory assessment to help decide on whether a bronchodilator trial may be beneficial. Globally, wheezing illnesses are under-recognized and could contribute to severe respiratory illness in young children.

After the assessment, ALRITE will provide most likely diagnoses and treatment recommendations based on the information provided: 1) pneumonia, 2) pneumonia + wheezing illness, 3) severe disease requiring urgent referral/intervention, or 4) upper respiratory infection (supportive care only).

## Instructions to participant:

We will ask you to complete a series of tasks using simulated clinical scenarios. There is no time limit or one single solution to completing each task. The study is designed to test the app and not you. You are welcome to ask me any questions that you have while completing the task. There may be times in the study where I do not answer your question because we are interested in seeing how you solve the problem. I will let you know when I cannot answer your question.

As you complete these tasks, we are going to ask you to think aloud as you work. Thinking aloud will help provide us an idea of what you are thinking as you are completing the task. We understand that you may forget to think aloud. If this happens, we ask you to tell us what you are thinking about. After each task is completed, I will ask you a few questions about the task. After all tasks have been completed, I will ask you a few questions about your overall experience of the ALRITE mobile application. If any of the questions are unclear, please ask for clarification.

We ask that during the scenarios, you imagine that you are using the app in the middle of a busy clinical shift and answer the questions as such.

## Participant Comments & Feedback

Participant comments are verbal cues that indicate successes and failures in the app. We will record these comments digitally for later review as well as notetaking during the interview. Participants will be asked to answer a brief survey after completing the interview.

## Errors

Errors are mistakes that the participants make while using the app that slows or stops the participant from completing each task. This data is critical for fixing errors and increasing efficiency in the app. These errors will be documented by the notetaker.

## Scenario 1:

### **Task 1: Input information provided into the app to determine whether a bronchodilator trial is recommended.**

*A new patient enters your clinic with the following circumstances:*

- *Name: (choose your name)*
- *Female*
- *Birthdate (choose a date where the child is between 4-6 months old)*
- *Alert and playful*
- *Not Vomiting or convulsing*
- *No difficulty eating or drinking*
- *Coughing for 10 days*
- *No HIV exposure risk*
- *This is her third episode of coughing/difficulty breathing episode since birth.*
- *On exam, her temperature is 37.3C. Oxygen saturation 94%. Respiratory rate 64. She has moderate chest indrawing. No Stridor. When you listen with a stethoscope, you hear wheezing when she inhales and exhales.*

**Task 2: Read aloud whether a bronchodilator trial is recommended. If recommended, please find the tutorial on how to administer the bronchodilator and talk through how to administer to your patient. Input that you have administered the bronchodilator in the app.**

## Scenario 2:

### **Task 3: Input information for the respiratory assessment using the video of a child provided.**

*A new patient enters your clinic with the following circumstances:*

- *Name: (choose a friend's name)*
- *Male*
- *Birthdate (choose a date where the child is 3 years old)*
- *Alert and playful*
- *Not Vomiting or convulsing*
- *No difficulty eating or drinking*
- *Coughing for 7 days*
- *No HIV exposure risk*
- *This is his second episode of coughing/difficulty breathing episode since birth*

*Watch video and record respiratory assessment*

**Task 4: Read aloud whether a bronchodilator trial is recommended. Then close the encounter and return to the home screen.**

## Scenario 3:

1 **Task 5: Return to your first patient's encounter (Scenario 1). Is she ready for re-assessment? How do you**  
2 **know?**

3 **If ready, please input her follow up examination outlined below.**

- 4 • *Name: (your name)*
- 5 • *After the bronchodilator, she seems to be breathing a little easier than before the trial. On exam, her oxygen*  
6 *saturation 95%. Respiratory rate 54. She has mild chest indrawing. She still has wheezing but only when she*  
7 *exhales.*

8 **Task 6: Talk through the diagnosis and treatment recommendations provided by the app.**  
9  
10  
11  
12  
13  
14  
15  
16  
17  
18  
19  
20  
21  
22  
23  
24  
25  
26  
27  
28  
29  
30  
31  
32  
33  
34  
35  
36  
37  
38  
39  
40  
41  
42  
43  
44  
45  
46  
47  
48  
49  
50  
51  
52  
53  
54  
55  
56  
57  
58  
59  
60

# Reporting checklist for qualitative study.

Based on the SRQR guidelines.

|                                            | Reporting Item                                                                                                                                                                                                                                                                                                                                                                                                                                                                                                                                             | Page Number |
|--------------------------------------------|------------------------------------------------------------------------------------------------------------------------------------------------------------------------------------------------------------------------------------------------------------------------------------------------------------------------------------------------------------------------------------------------------------------------------------------------------------------------------------------------------------------------------------------------------------|-------------|
| <b>Title</b>                               |                                                                                                                                                                                                                                                                                                                                                                                                                                                                                                                                                            |             |
|                                            | <a href="#">#1</a> Concise description of the nature and topic of the study identifying the study as qualitative or indicating the approach (e.g. ethnography, grounded theory) or data collection methods (e.g. interview, focus group) is recommended                                                                                                                                                                                                                                                                                                    | 1           |
| <b>Abstract</b>                            |                                                                                                                                                                                                                                                                                                                                                                                                                                                                                                                                                            |             |
|                                            | <a href="#">#2</a> Summary of the key elements of the study using the abstract format of the intended publication; typically includes background, purpose, methods, results and conclusions                                                                                                                                                                                                                                                                                                                                                                | 2           |
| <b>Introduction</b>                        |                                                                                                                                                                                                                                                                                                                                                                                                                                                                                                                                                            |             |
| Problem formulation                        | <a href="#">#3</a> Description and significance of the problem / phenomenon studied: review of relevant theory and empirical work; problem statement                                                                                                                                                                                                                                                                                                                                                                                                       | 4-5         |
| Purpose or research question               | <a href="#">#4</a> Purpose of the study and specific objectives or questions                                                                                                                                                                                                                                                                                                                                                                                                                                                                               | 5           |
| <b>Methods</b>                             |                                                                                                                                                                                                                                                                                                                                                                                                                                                                                                                                                            |             |
| Qualitative approach and research paradigm | <a href="#">#5</a> Qualitative approach (e.g. ethnography, grounded theory, case study, phenomenology, narrative research) and guiding theory if appropriate; identifying the research paradigm (e.g. postpositivist, constructivist / interpretivist) is also recommended; rationale. The rationale should briefly discuss the justification for choosing that theory, approach, method or technique rather than other options available; the assumptions and limitations implicit in those choices and how those choices influence study conclusions and | 8           |

transferability. As appropriate the rationale for several items might be discussed together.

|    |                              |                     |            |
|----|------------------------------|---------------------|------------|
| 1  |                              |                     |            |
| 2  |                              |                     |            |
| 3  |                              |                     |            |
| 4  | Researcher characteristics   | <a href="#">#6</a>  | 7-8        |
| 5  | and reflexivity              |                     |            |
| 6  |                              |                     |            |
| 7  |                              |                     |            |
| 8  |                              |                     |            |
| 9  |                              |                     |            |
| 10 |                              |                     |            |
| 11 |                              |                     |            |
| 12 |                              |                     |            |
| 13 |                              |                     |            |
| 14 | Context                      | <a href="#">#7</a>  | 5-6        |
| 15 |                              |                     |            |
| 16 | Sampling strategy            | <a href="#">#8</a>  | 6,8        |
| 17 |                              |                     |            |
| 18 |                              |                     |            |
| 19 |                              |                     |            |
| 20 |                              |                     |            |
| 21 | Ethical issues pertaining to | <a href="#">#9</a>  | 9          |
| 22 | human subjects               |                     |            |
| 23 |                              |                     |            |
| 24 |                              |                     |            |
| 25 |                              |                     |            |
| 26 |                              |                     |            |
| 27 | Data collection methods      | <a href="#">#10</a> | 7-9        |
| 28 |                              |                     |            |
| 29 |                              |                     |            |
| 30 |                              |                     |            |
| 31 |                              |                     |            |
| 32 |                              |                     |            |
| 33 |                              |                     |            |
| 34 |                              |                     |            |
| 35 | Data collection              | <a href="#">#11</a> | 7,         |
| 36 | instruments and              |                     | supplement |
| 37 | technologies                 |                     |            |
| 38 |                              |                     |            |
| 39 |                              |                     |            |
| 40 |                              |                     |            |
| 41 |                              |                     |            |
| 42 | Units of study               | <a href="#">#12</a> | 9          |
| 43 |                              |                     |            |
| 44 |                              |                     |            |
| 45 |                              |                     |            |
| 46 |                              |                     |            |
| 47 | Data processing              | <a href="#">#13</a> | 7          |
| 48 |                              |                     |            |
| 49 |                              |                     |            |
| 50 |                              |                     |            |
| 51 |                              |                     |            |
| 52 |                              |                     |            |
| 53 |                              |                     |            |
| 54 | Data analysis                | <a href="#">#14</a> | 8          |
| 55 |                              |                     |            |
| 56 |                              |                     |            |
| 57 |                              |                     |            |
| 58 |                              |                     |            |
| 59 |                              |                     |            |
| 60 |                              |                     |            |

|    |                              |                     |                                                                 |       |
|----|------------------------------|---------------------|-----------------------------------------------------------------|-------|
| 1  | Techniques to enhance        | <a href="#">#15</a> | Techniques to enhance trustworthiness and credibility of        | 8     |
| 2  | trustworthiness              |                     | data analysis (e.g. member checking, audit trail,               |       |
| 3  |                              |                     | triangulation); rationale                                       |       |
| 4  |                              |                     |                                                                 |       |
| 5  |                              |                     |                                                                 |       |
| 6  | <b>Results/findings</b>      |                     |                                                                 |       |
| 7  |                              |                     |                                                                 |       |
| 8  | Syntheses and                | <a href="#">#16</a> | Main findings (e.g. interpretations, inferences, and themes);   | 9-19  |
| 9  | interpretation               |                     | might include development of a theory or model, or              |       |
| 10 |                              |                     | integration with prior research or theory                       |       |
| 11 |                              |                     |                                                                 |       |
| 12 |                              |                     |                                                                 |       |
| 13 |                              |                     |                                                                 |       |
| 14 | Links to empirical data      | <a href="#">#17</a> | Evidence (e.g. quotes, field notes, text excerpts,              | 10-19 |
| 15 |                              |                     | photographs) to substantiate analytic findings                  |       |
| 16 |                              |                     |                                                                 |       |
| 17 |                              |                     |                                                                 |       |
| 18 | <b>Discussion</b>            |                     |                                                                 |       |
| 19 |                              |                     |                                                                 |       |
| 20 | Intergration with prior      | <a href="#">#18</a> | Short summary of main findings; explanation of how              | 20-22 |
| 21 | work, implications,          |                     | findings and conclusions connect to, support, elaborate on,     |       |
| 22 | transferability and          |                     | or challenge conclusions of earlier scholarship; discussion     |       |
| 23 | contribution(s) to the field |                     | of scope of application / generalizability; identification of   |       |
| 24 |                              |                     | unique contributions(s) to scholarship in a discipline or field |       |
| 25 |                              |                     |                                                                 |       |
| 26 |                              |                     |                                                                 |       |
| 27 |                              |                     |                                                                 |       |
| 28 | Limitations                  | <a href="#">#19</a> | Trustworthiness and limitations of findings                     | 22    |
| 29 |                              |                     |                                                                 |       |
| 30 |                              |                     |                                                                 |       |
| 31 | <b>Other</b>                 |                     |                                                                 |       |
| 32 |                              |                     |                                                                 |       |
| 33 | Conflicts of interest        | <a href="#">#20</a> | Potential sources of influence of perceived influence on        | 24    |
| 34 |                              |                     | study conduct and conclusions; how these were managed           |       |
| 35 |                              |                     |                                                                 |       |
| 36 |                              |                     |                                                                 |       |
| 37 | Funding                      | <a href="#">#21</a> | Sources of funding and other support; role of funders in data   | 24    |
| 38 |                              |                     | collection, interpretation and reporting                        |       |
| 39 |                              |                     |                                                                 |       |

None The SRQR checklist is distributed with permission of Wolters Kluwer © 2014 by the Association of American Medical Colleges. This checklist can be completed online using <https://www.goodreports.org/>, a tool made by the [EQUATOR Network](#) in collaboration with [Penelope.ai](#)
